# Supplementary material for: Total synthesis of (+)-petromyroxol via tandem α-aminoxylation–allylation and asymmetric dihydroxylation–SN2 cyclization approach
Source: Royal Society of Chemistry journal article supplement (doi:10.1039/c5ra10405j), 2015-01-01
Supplement: c5ra10405j1.pdf [file c5ra10405j1.pdf]

## Supporting information

(NMR Spectral Data)

### **Total Synthesis of (+)-petromyroxol via tandem $\alpha$ -aminoxylation-allylation and asymmetric dihydroxylation- $S_N2$ cyclization approach†‡**

**U. Nookaraju and Pradeep Kumar\***

*Division of Organic Chemistry, CSIR-National Chemical Laboratory, Pune*

*411008, India.*

Telephone number: +91-20-25902627

Fax number: +91-20-25902629

*E-mail:* pk.tripathi@ncl.res.in

#### **Table of Contents**

|                                                                            |        |
|----------------------------------------------------------------------------|--------|
| $^1\text{H}$ NMR, $^{13}\text{C}$ NMR and mass spectra                     | 2 - 47 |
| Spectroscopic data comparison of both synthetic & natural (+)-petromyroxol | 48-50  |

# $^1\text{H}$ NMR (500MHz, $\text{CDCl}_3$ ) of the compound (4*R*,5*R*)-5-((phenylamino)oxy)dec-1-en-4-ol 6:

Thu4av500#002(m) lower syn clean.001.001.1r.esp

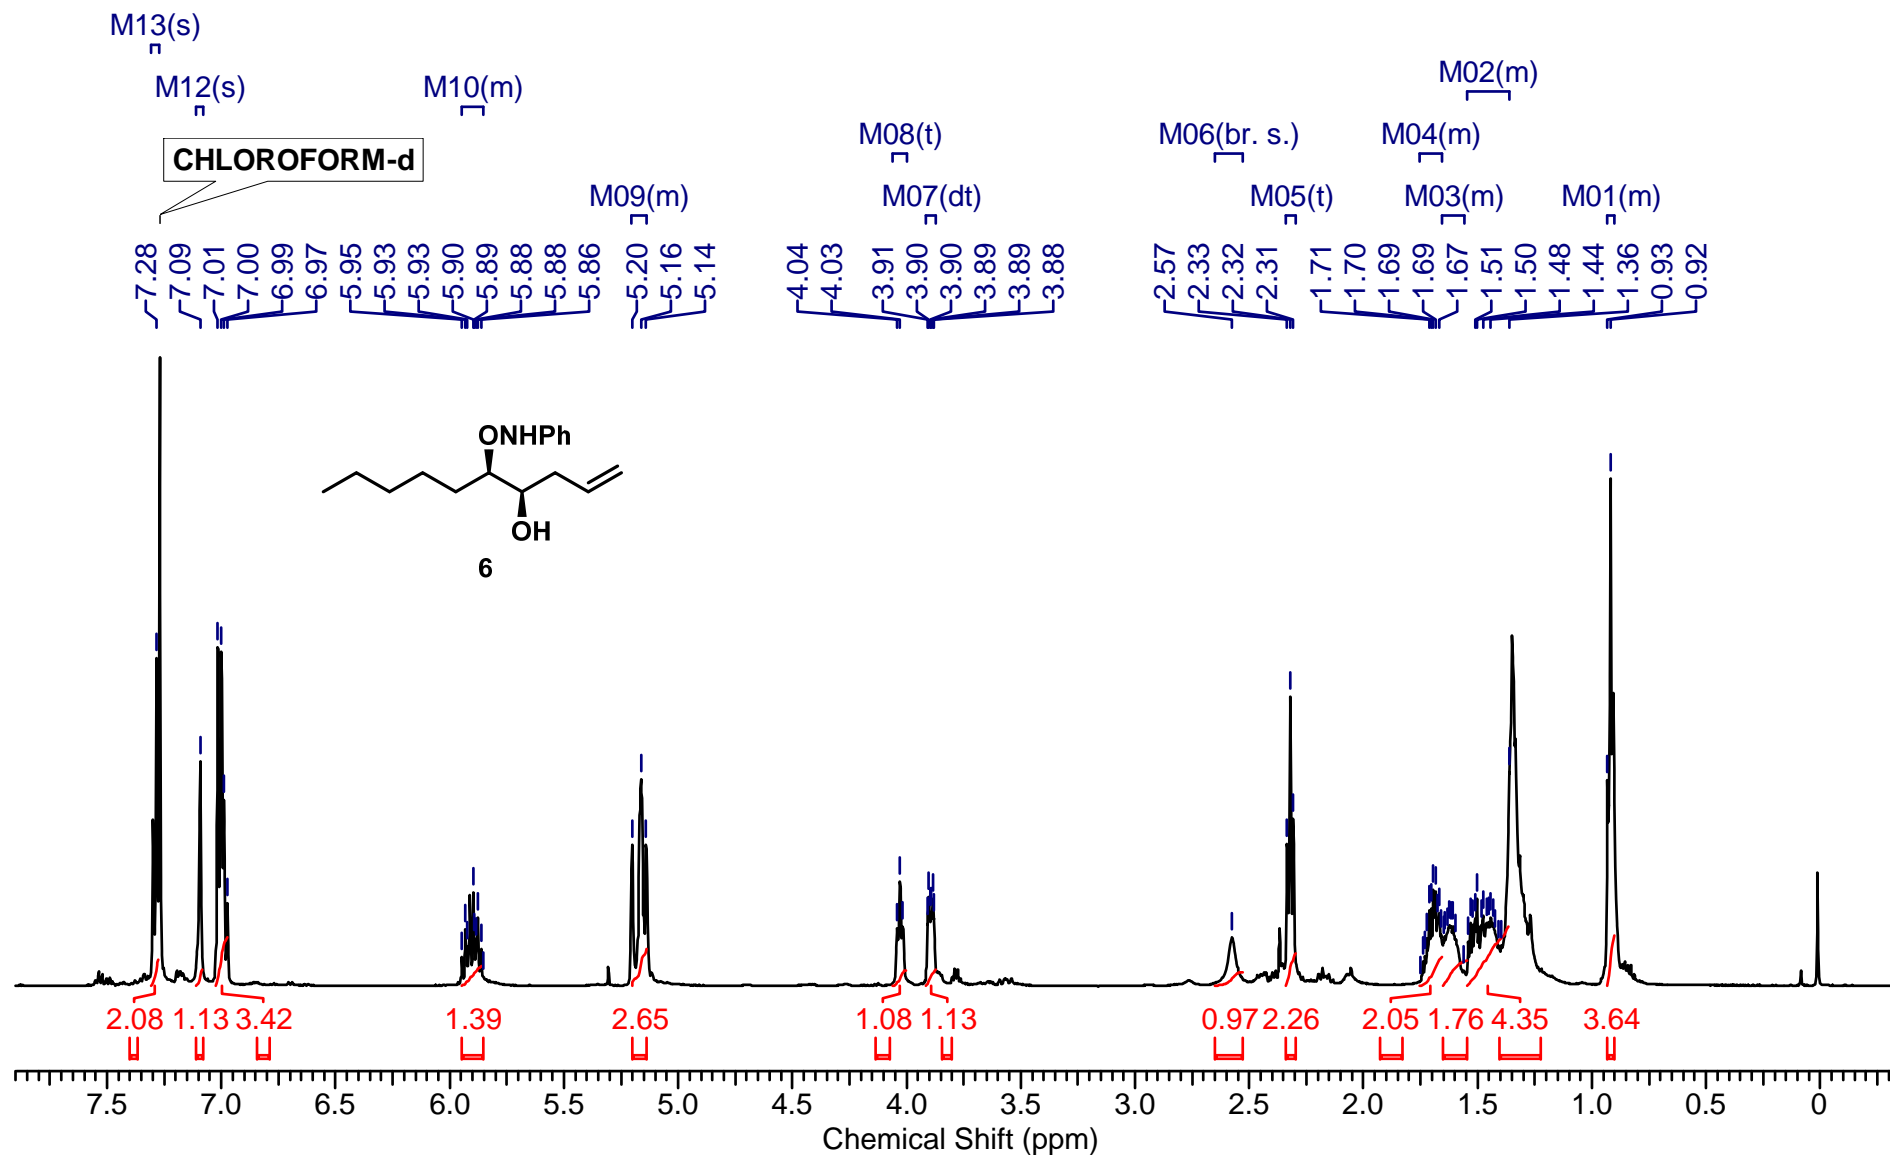

# $^{13}\text{C}$ NMR (125MHz, $\text{CDCl}_3$ ) of the compound (4*R*,5*R*)-5-((phenylamino)oxy)dec-1-en-4-ol 6:

Thu4av500#002,p-1 lower syn clean.003.001.1r.esp

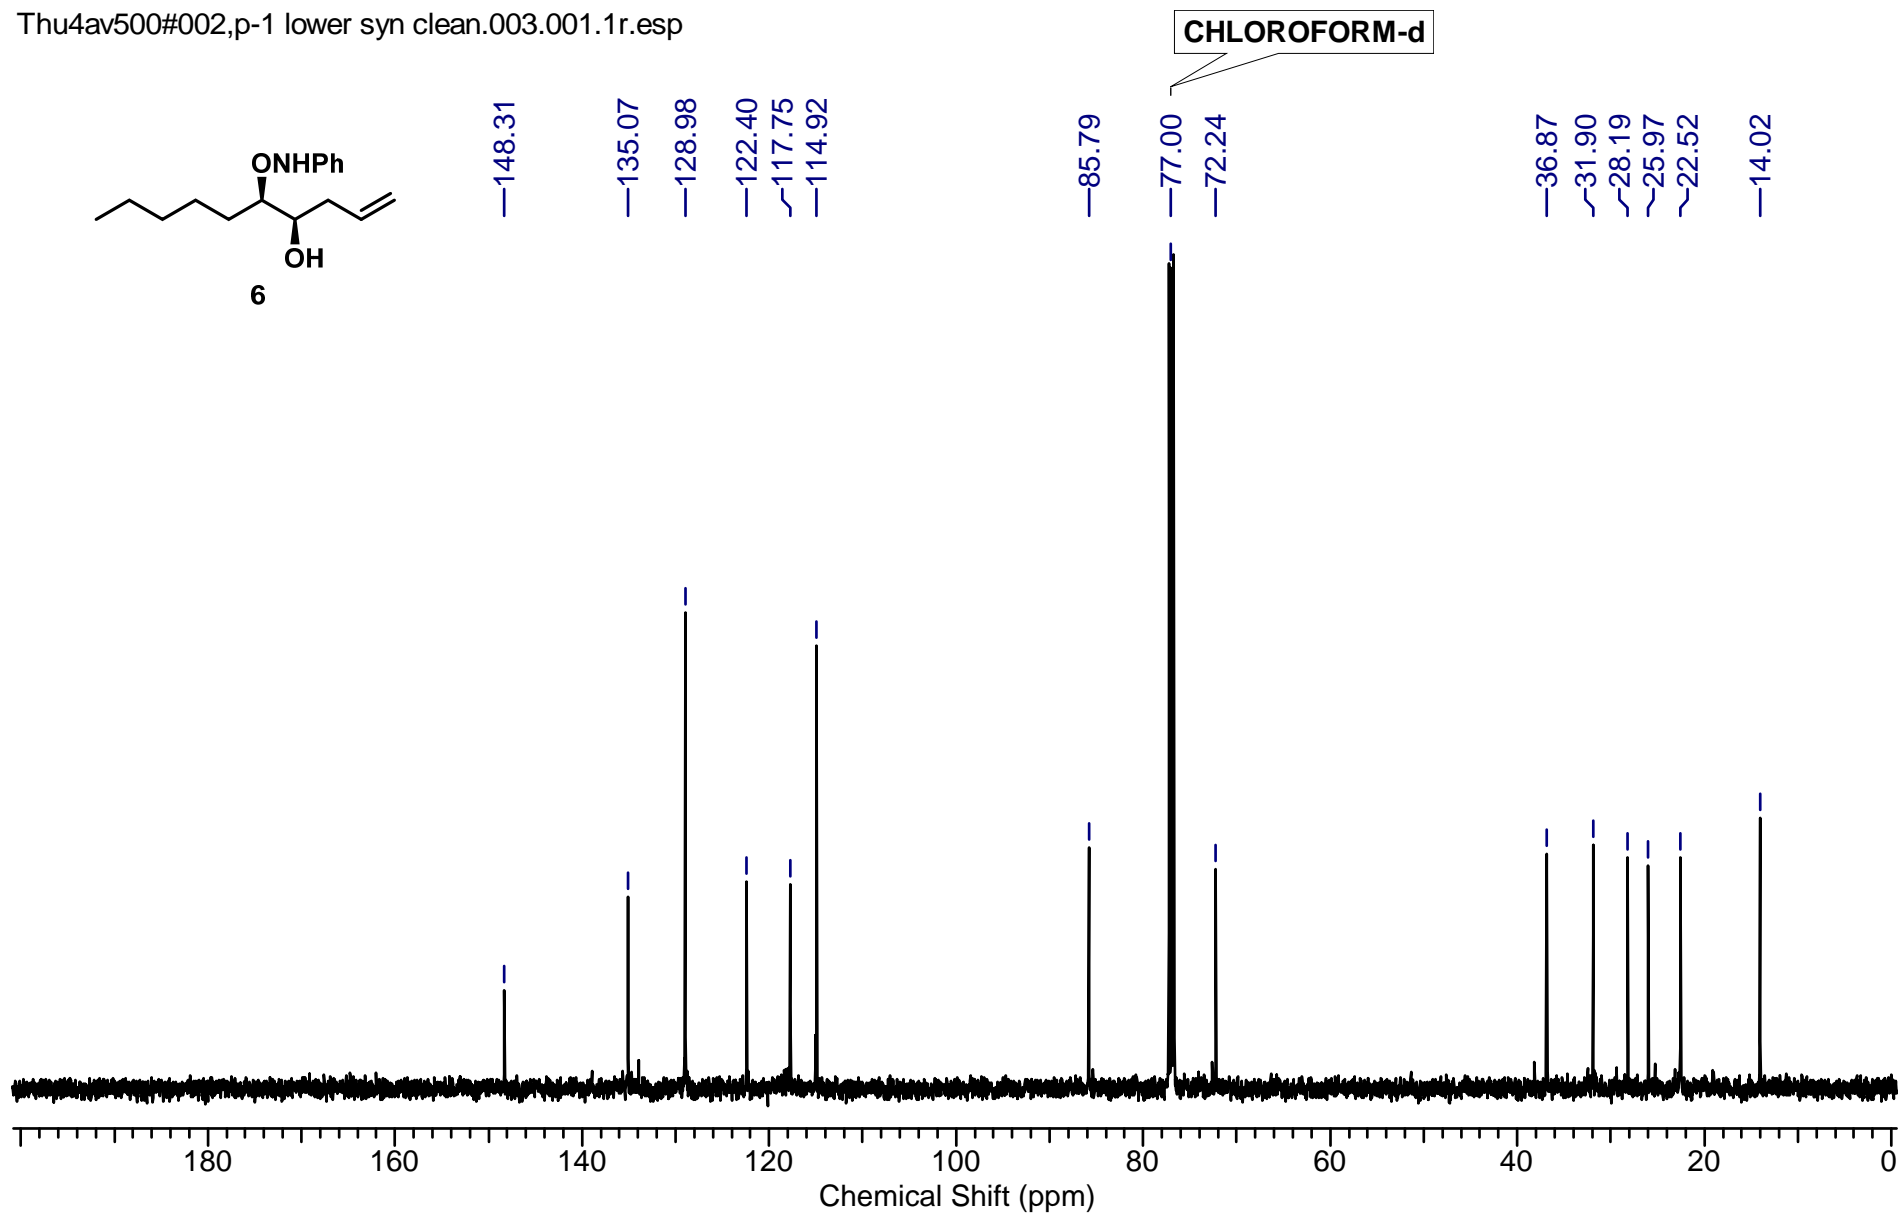

UNR-A-1 #132 RT: 0.59 AV: 1 NL: 2.54E7  
T: FTMS + p ESI Full ms [36.00-1290.00]

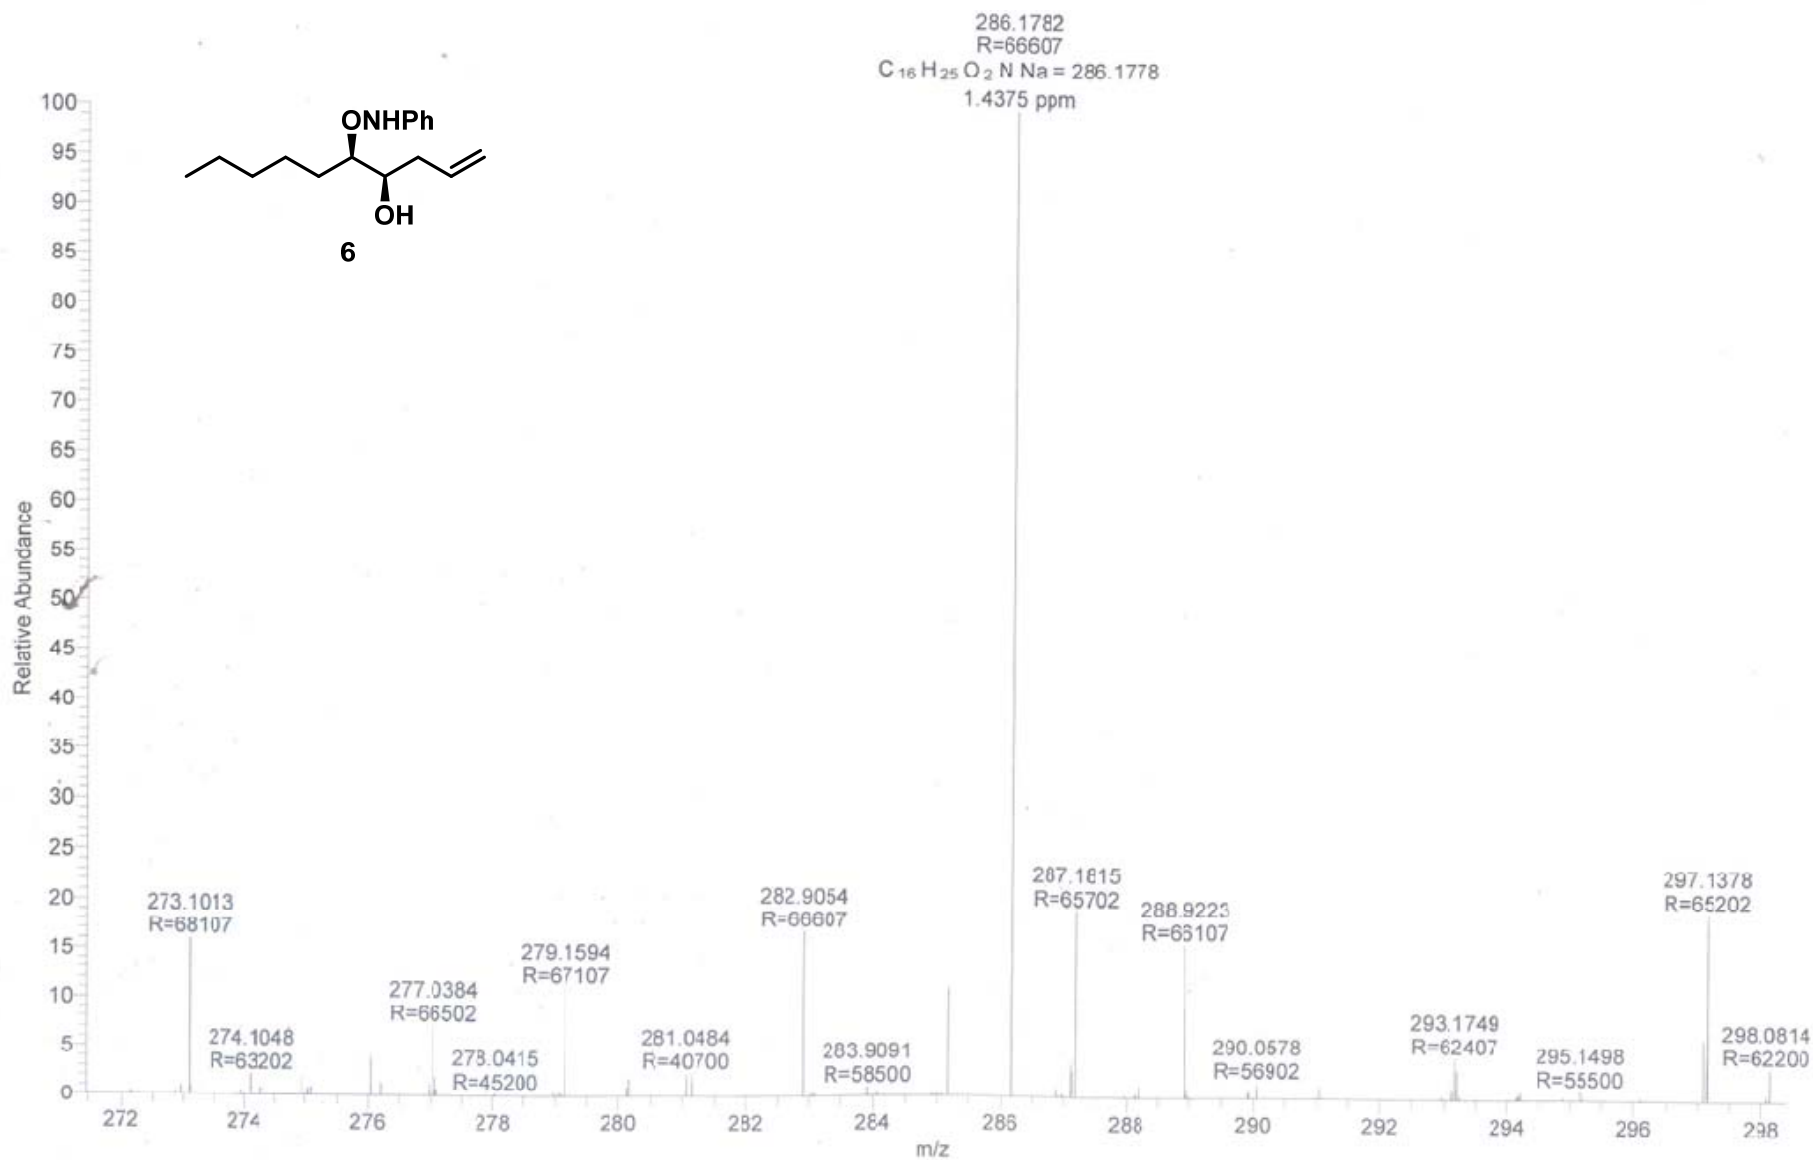

## HPLC (*ee*) of the compound (4*R*,5*R*)-5-((phenylamino)oxy)dec-1-en-4-ol 6:

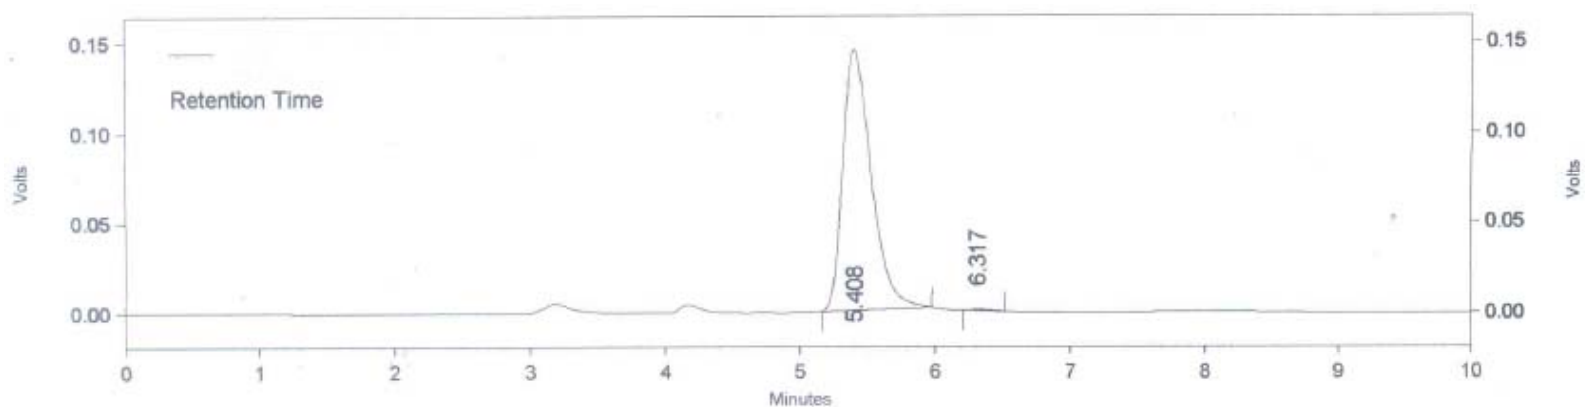

Detector A - 1 (230nm)

| Pk #          | Retention Time | Area           | Area %         |
|---------------|----------------|----------------|----------------|
| 1             | 5.408          | 2119412        | 99.713         |
| 2             | 6.317          | 6108           | 0.287          |
| <b>Totals</b> |                | <b>2125520</b> | <b>100.000</b> |

Project Leader :Dr. Tripathi P.K.  
 Column :Chiralcel OD-H (250mm x 4.6mm)  
 Mobile Phase :IPA:n-Hexane (10 : 90)  
 Wavelength : 230nm  
 Flow Rate :1mL/min (620psi)  
 Conc. : 1mg/1ml  
 Inj vol- : 2uL

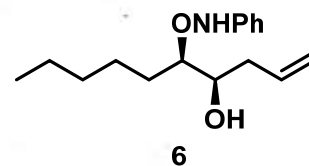

# $^1\text{H}$ NMR (500MHz, $\text{CDCl}_3$ ) of the compound (4*S*,5*R*)-5-((phenylamino)oxy)dec-1-en-4-ol 7:

Wed4av500#001\_P-1\_LIPFER.001.001.1r.esp

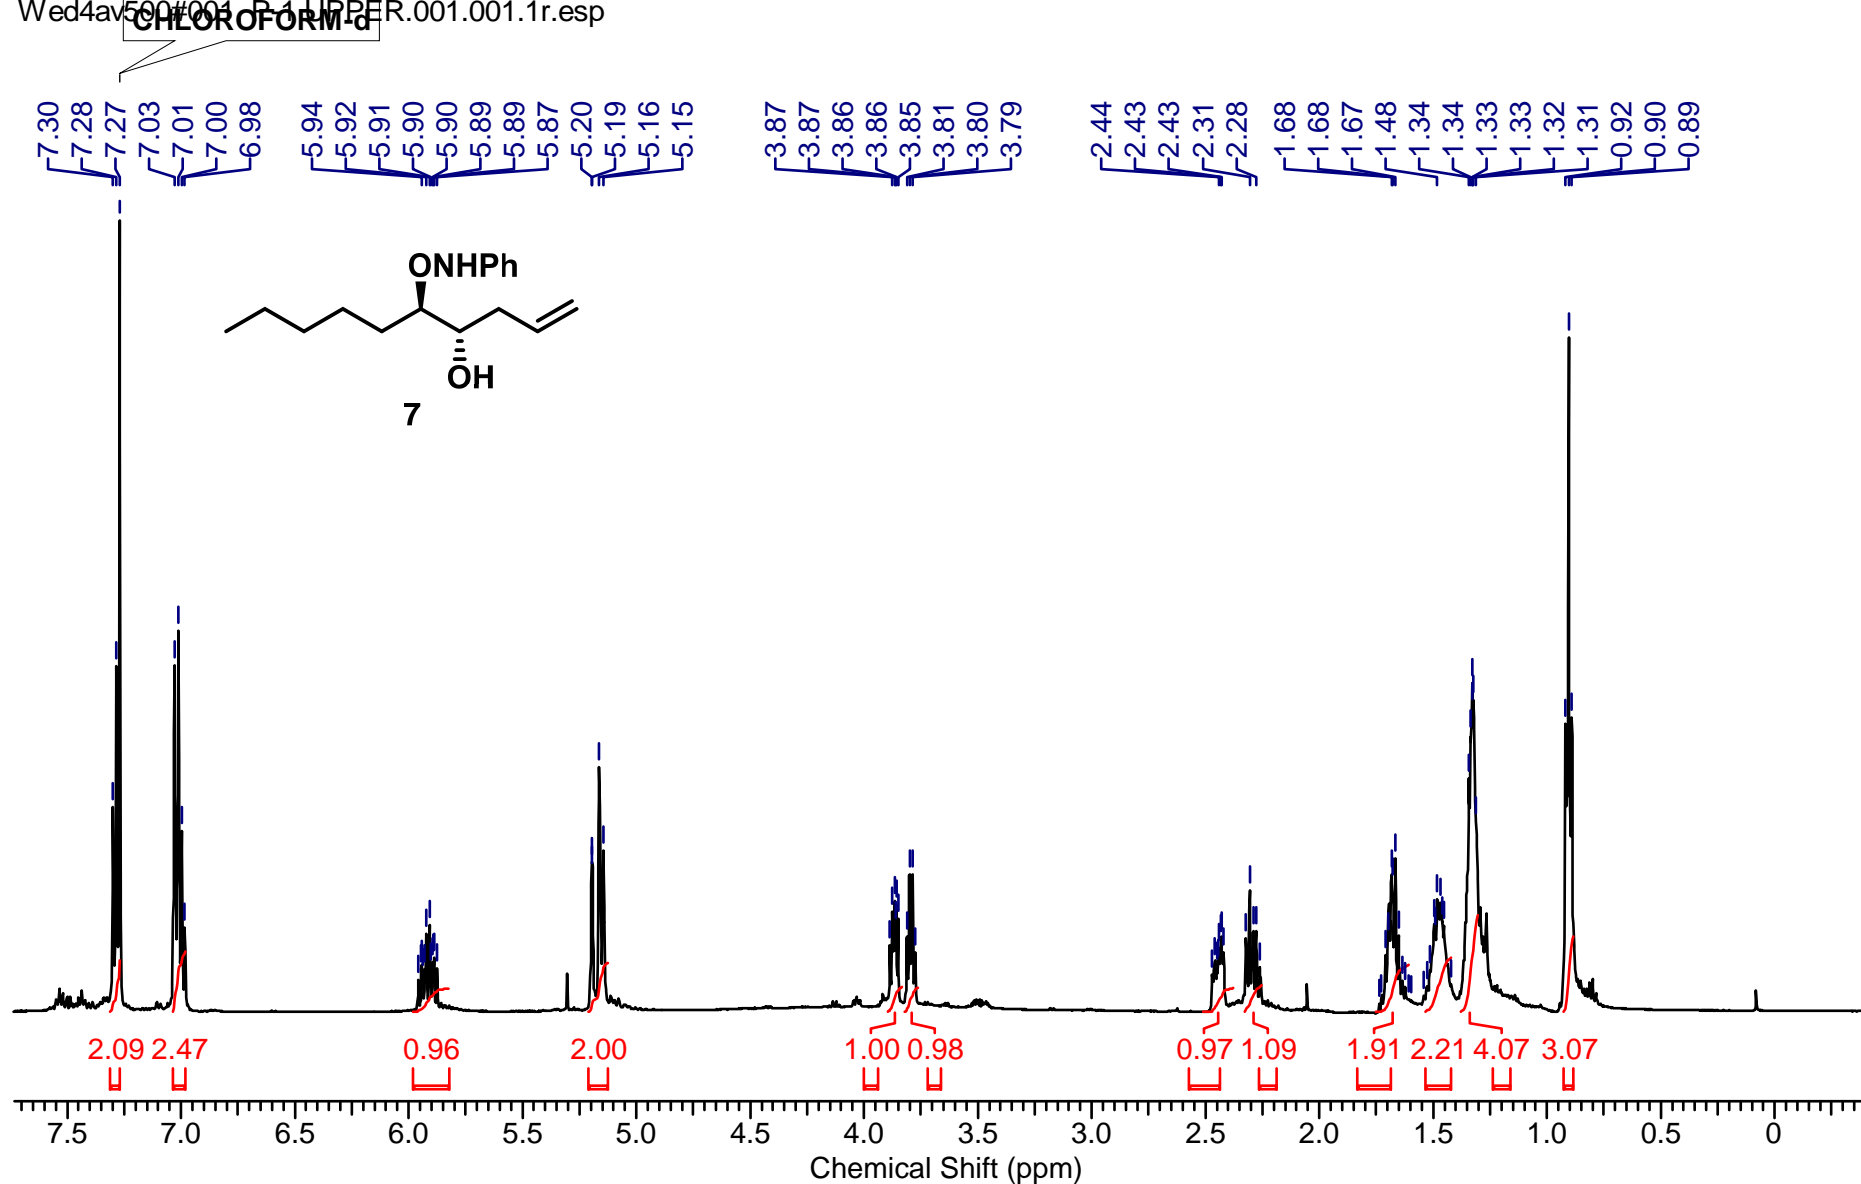

# $^{13}\text{C}$ NMR (125MHz, $\text{CDCl}_3$ ) of the compound (4*S*,5*R*)-5-((phenylamino)oxy)dec-1-en-4-ol 3:

Wed4av500#001, P-1 UPPER.003.001.1r.esp

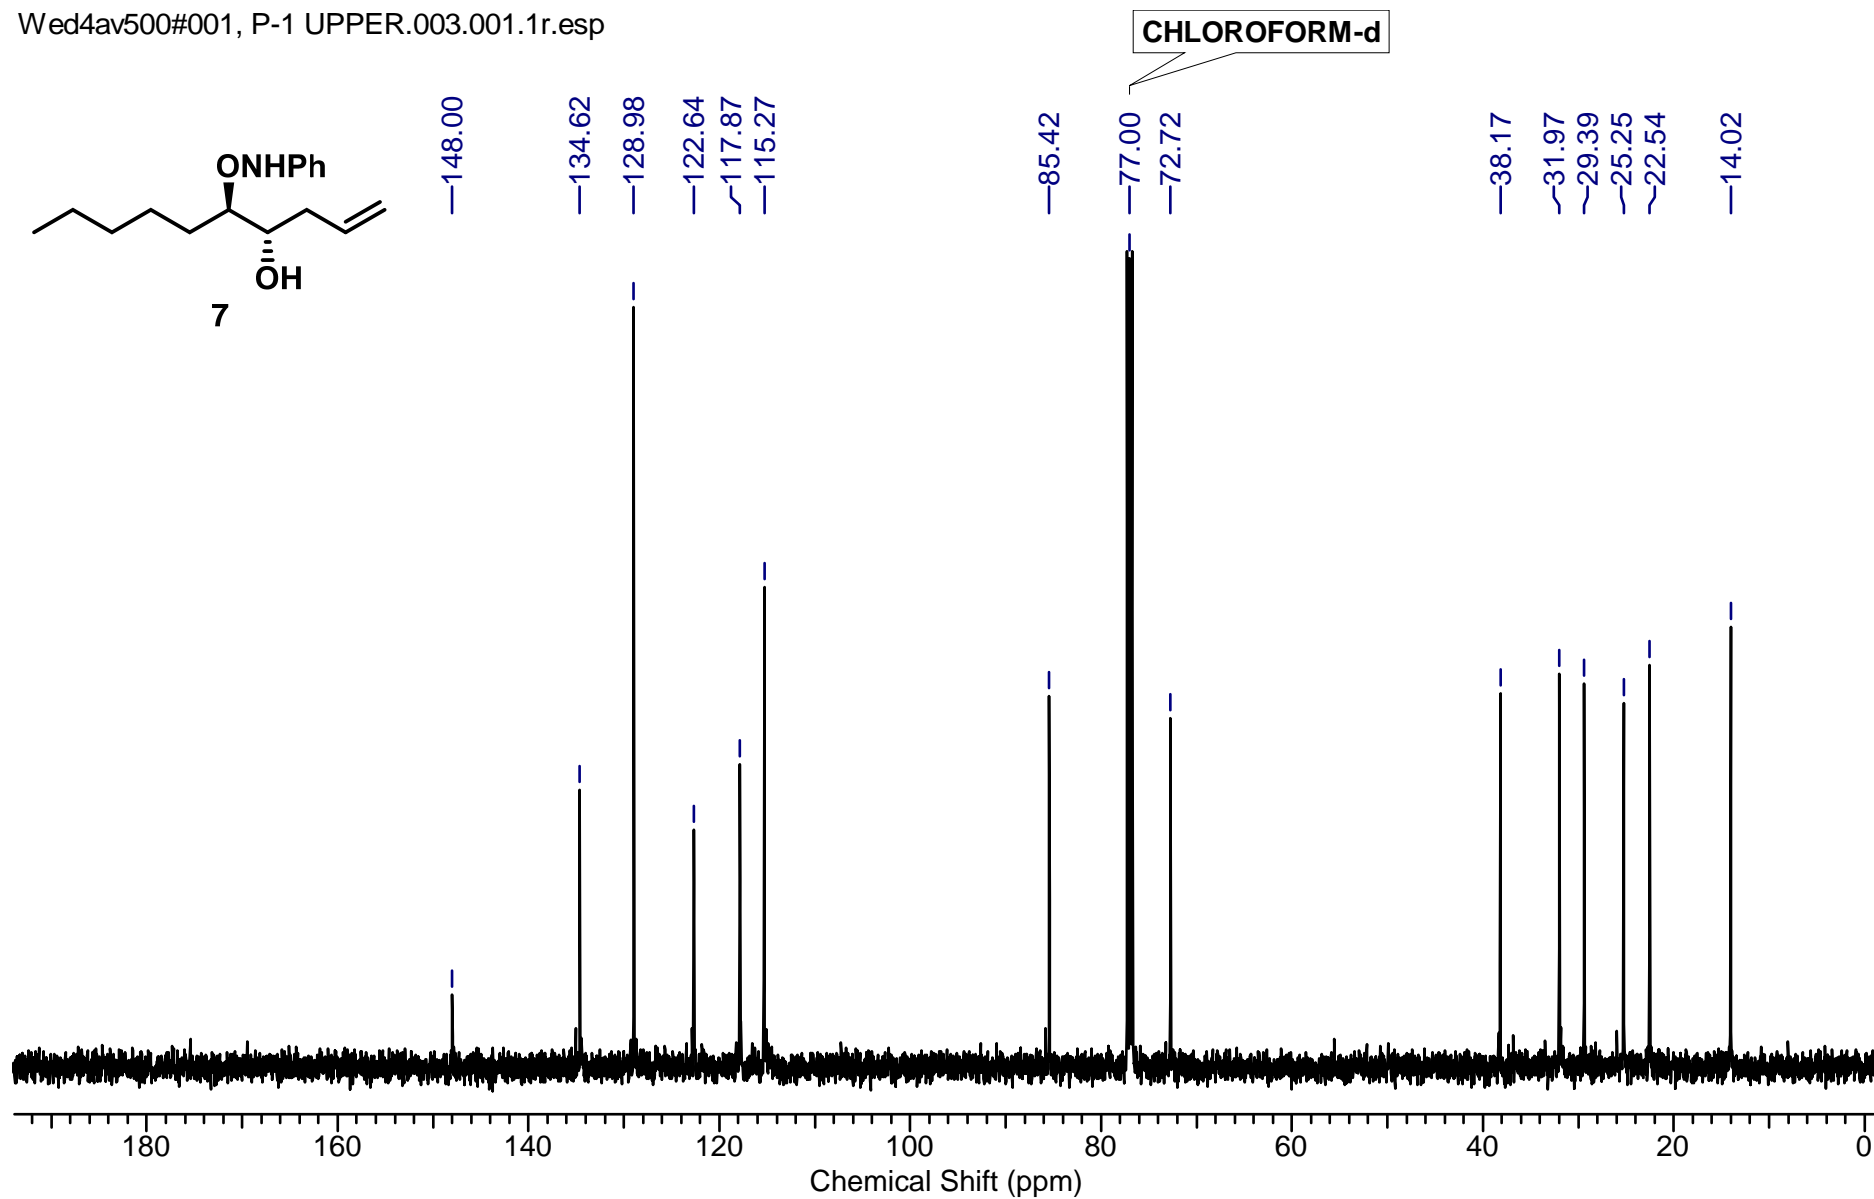

UNR-A-11 #137 RT: 0.61 AV: 1 NL: 1.80E7  
T: FTMS + p ESI Full ms [86.00-1290.00]

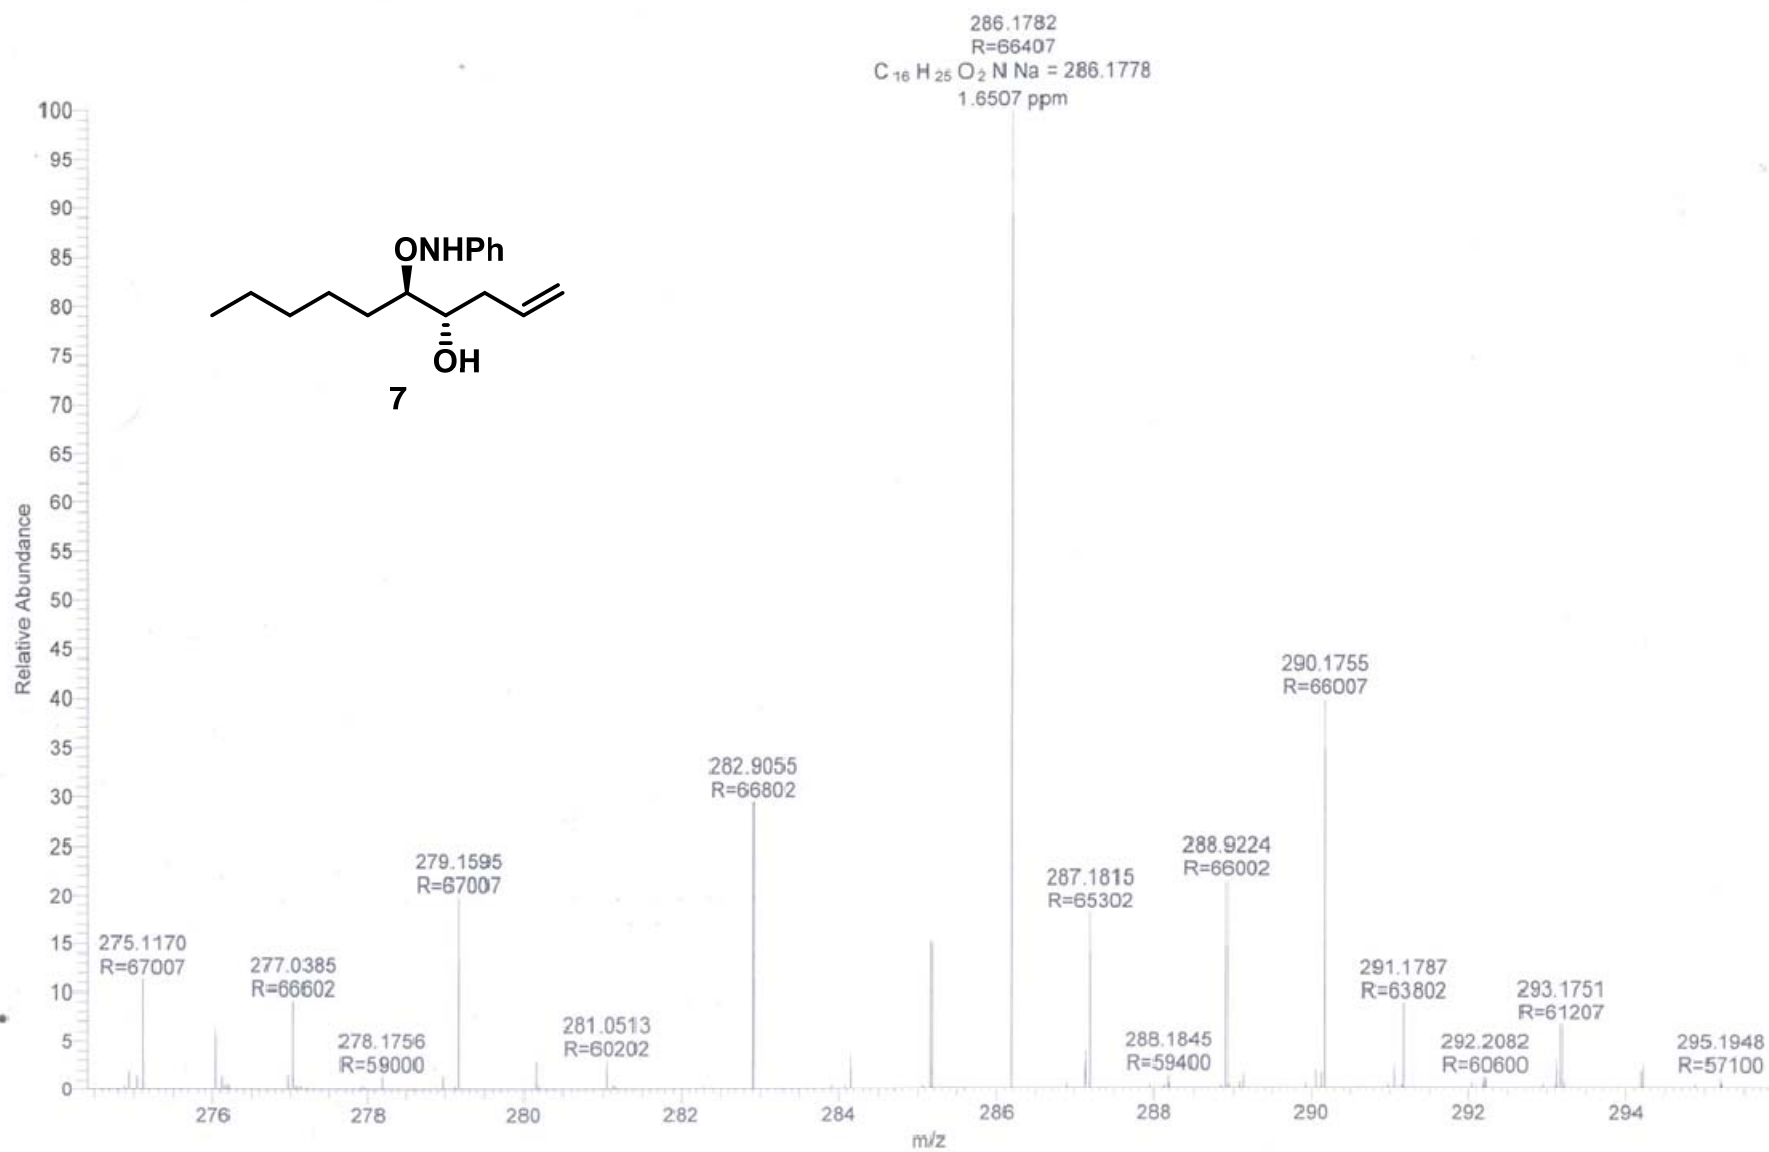



# HPLC (*ee*) of the compound (4*S*,5*R*)-5-((phenylamino)oxy)dec-1-en-4-ol 7:

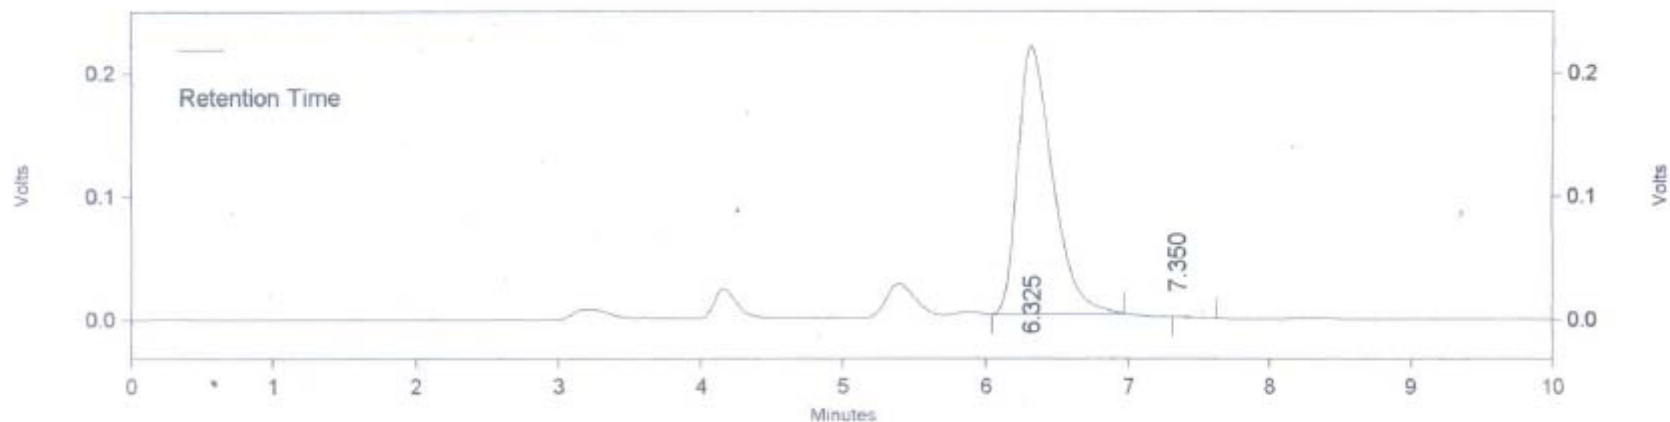

Detector A - 1 (230nm)

| Pk #   | Retention Time | Area    | Area %  |
|--------|----------------|---------|---------|
| 1      | 6.325          | 3693207 | 99.915  |
| 2      | 7.350          | 3129    | 0.085   |
| Totals |                | 3696336 | 100.000 |

Project Leader : Dr. Tripathi P.K.  
 Column : Chiralcel OD-H (250mm x 4.6mm)  
 Mobile Phase : IPA:n-Hexane (10 : 90)  
 Wavelength : 230nm  
 Flow Rate : 1mL/min (620psi)  
 Conc. : 1mg/1ml  
 Inj vol- : 2uL

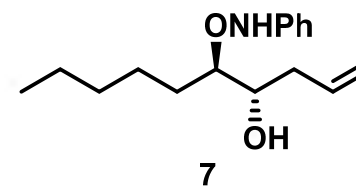

**$^1\text{H}$  NMR (400MHz,  $\text{CDCl}_3$ ) of the compound (4*S*,5*R*)-4-((tert-butyldimethylsilyl)oxy)dec-1-en-5-ol 9:**

Wed4av400#019\_A\_421004001\_1r.esp

CHLOROFORM-d

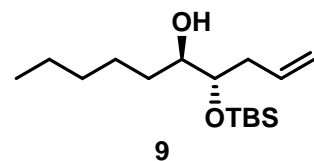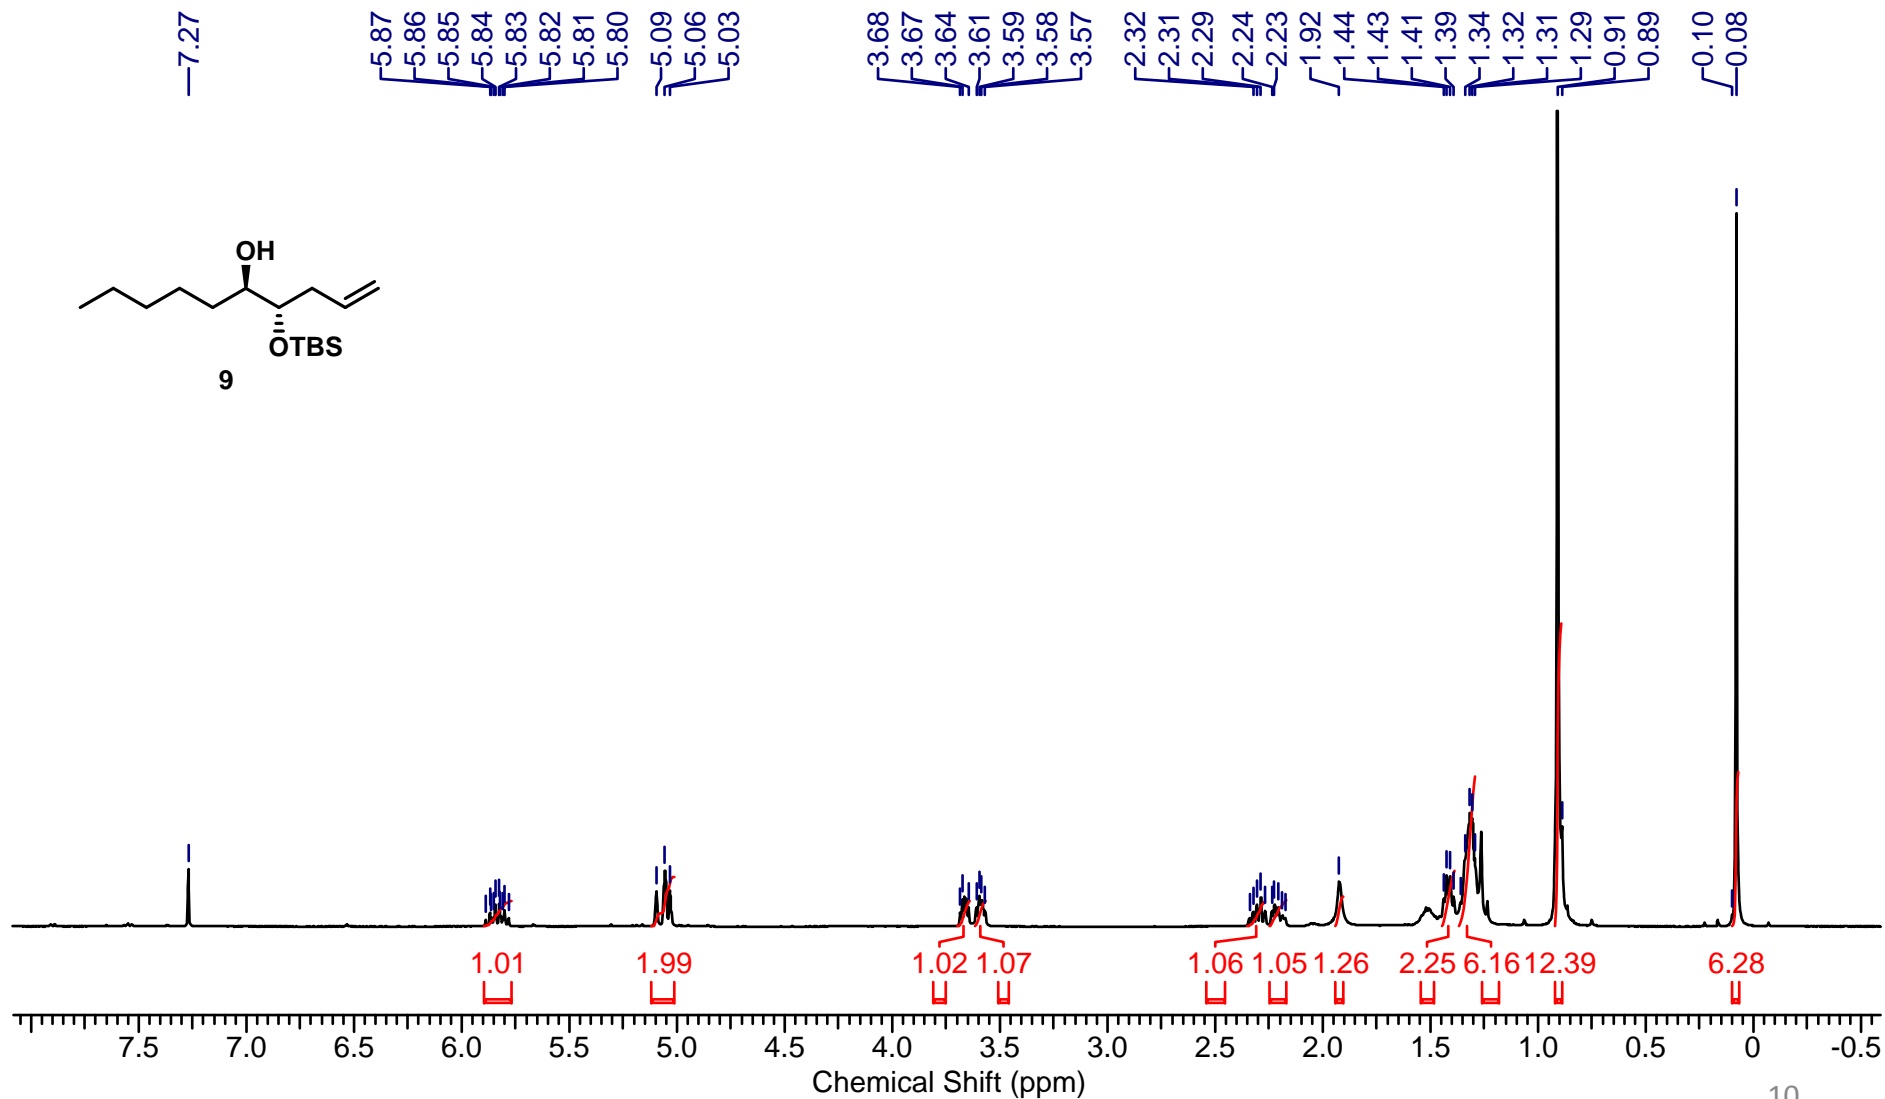

**$^{13}\text{C}$  NMR (100MHz,  $\text{CDCl}_3$ ) of the compound (4*S*,5*R*)-4-((tert-butyldimethylsilyl)oxy)dec-1-en-5-ol 9:**

Wed4av400#019, A-421.003.001.1r.esp

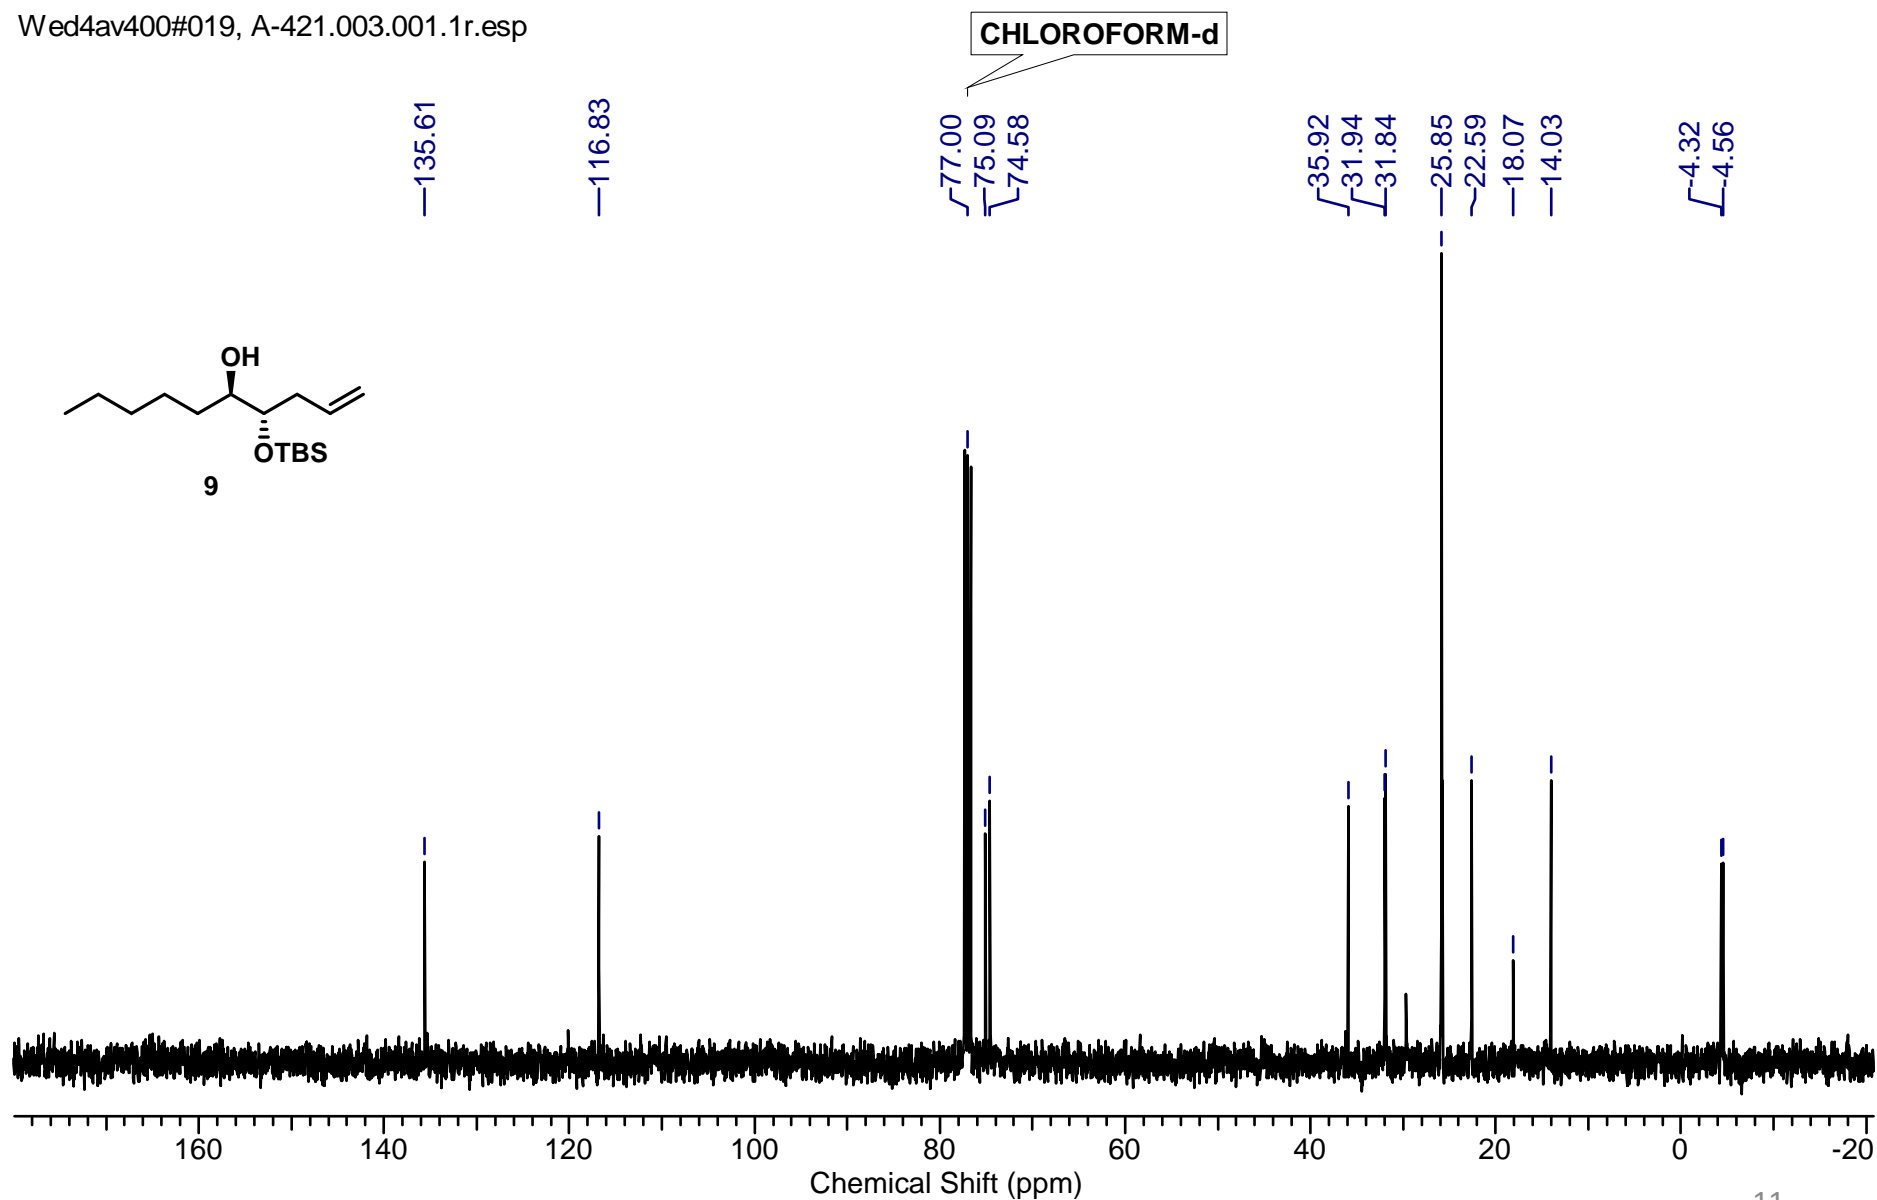

# DEPT NMR (100MHz, CDCl<sub>3</sub>) of the compound (4*S*,5*R*)-4-((*tert*-butyldimethylsilyl)oxy)dec-1-en-5-ol 9:

Wed4a04100#019, A-421.002.001.1r.esp

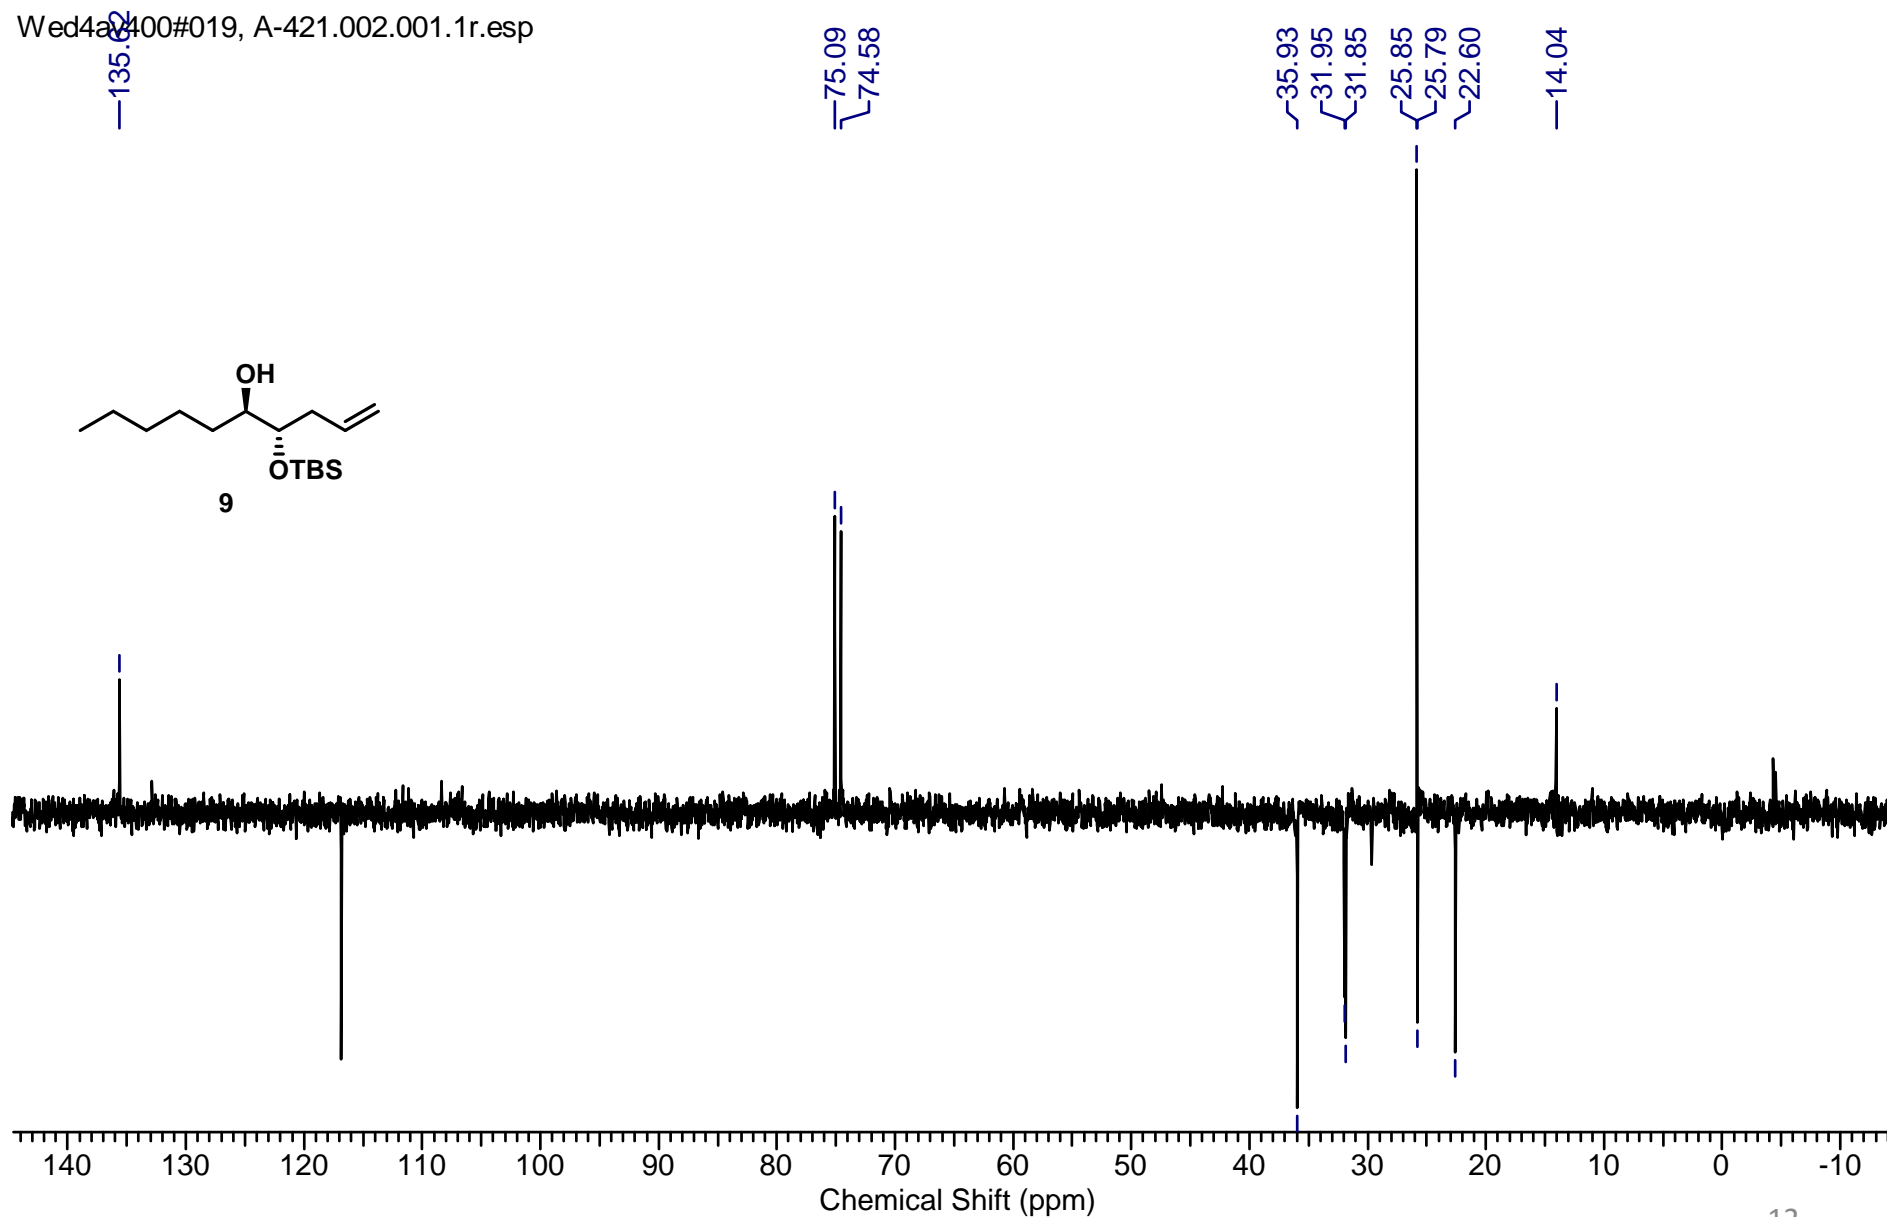

UNR-A-12 #253 RT: 1.12 AV: 1 NL 9.51E7  
T: FTMS + p ESI Full ms [80.00-1290.00]

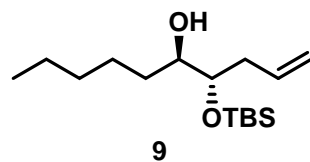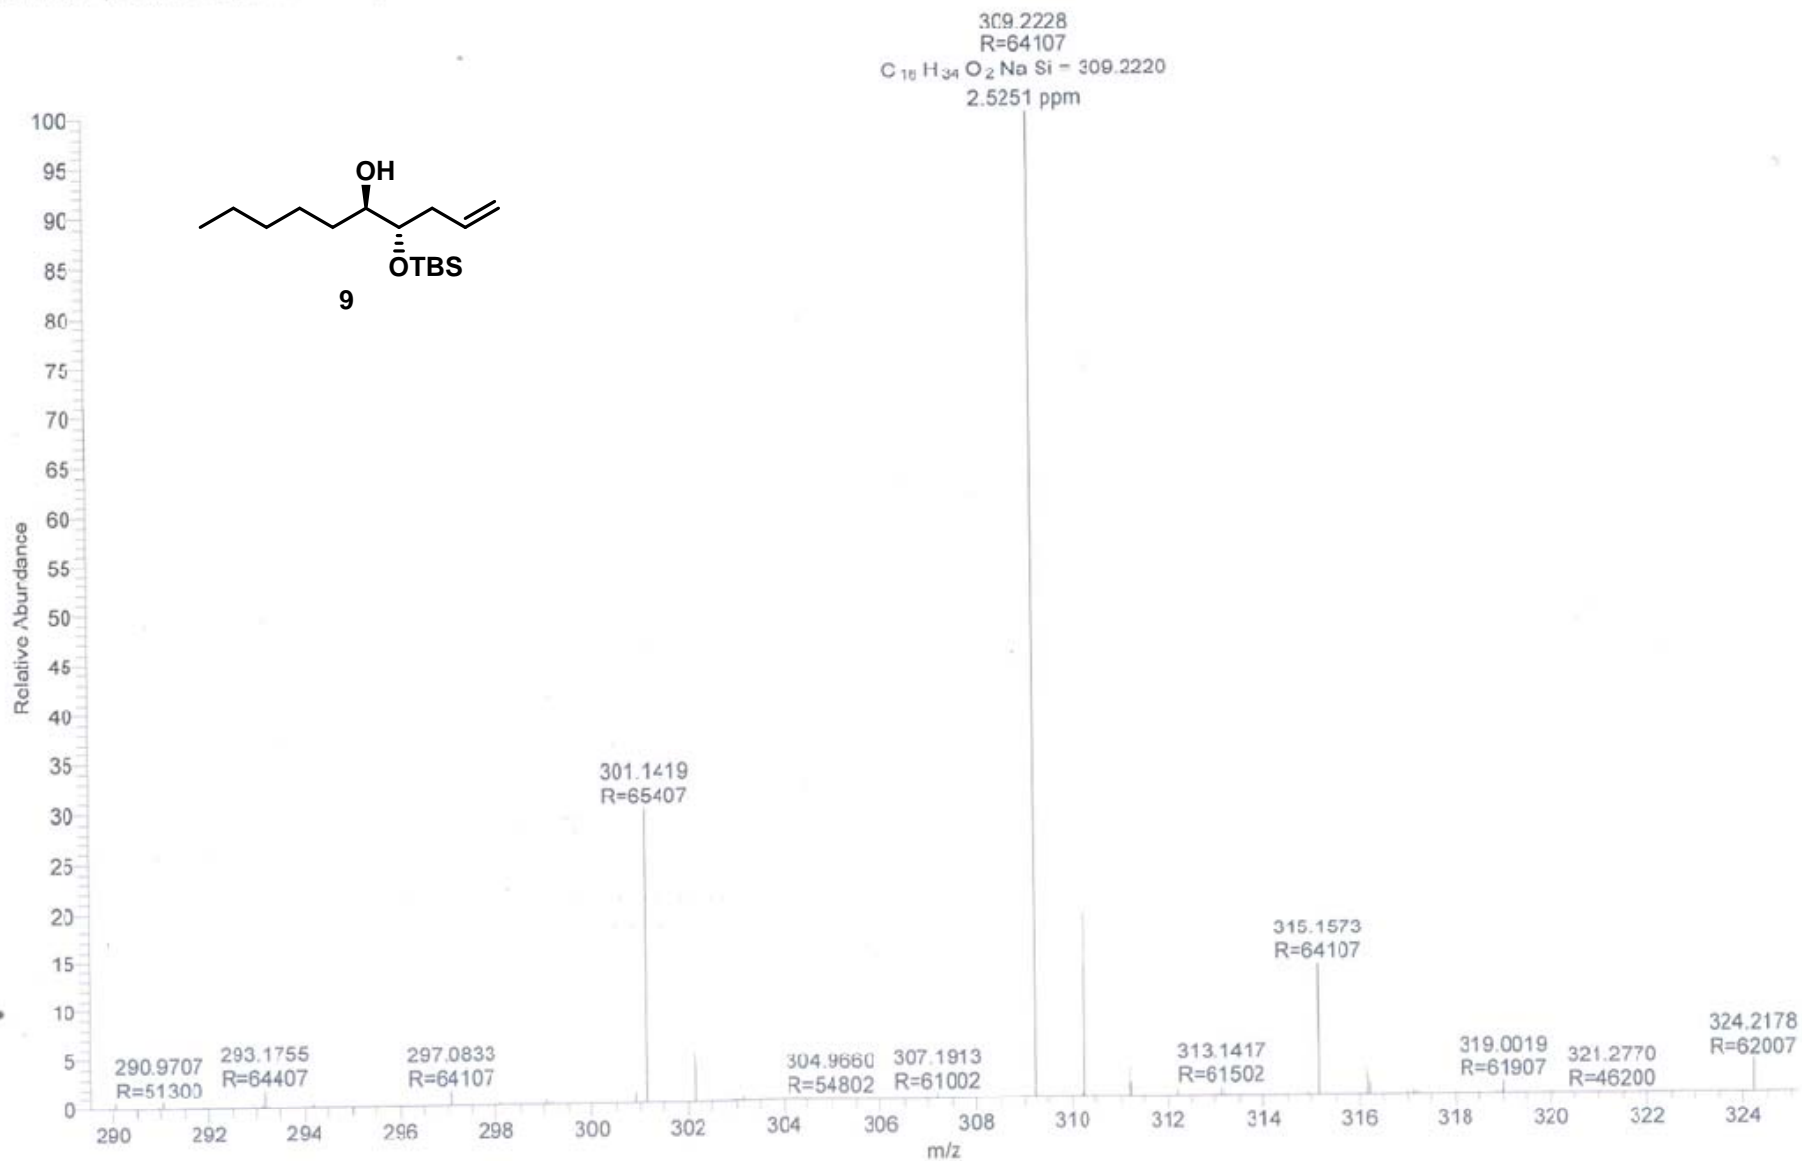

**$^1\text{H}$  NMR (400MHz,  $\text{CDCl}_3$ ) of the compound (((4*S*,5*R*)-5-(benzyloxy)dec-1-en-4-yl)oxy)(*tert*-butyl) dimethylsilane 10:**

Tue3av400#018.0010011-000  
CHLOROFORM-d

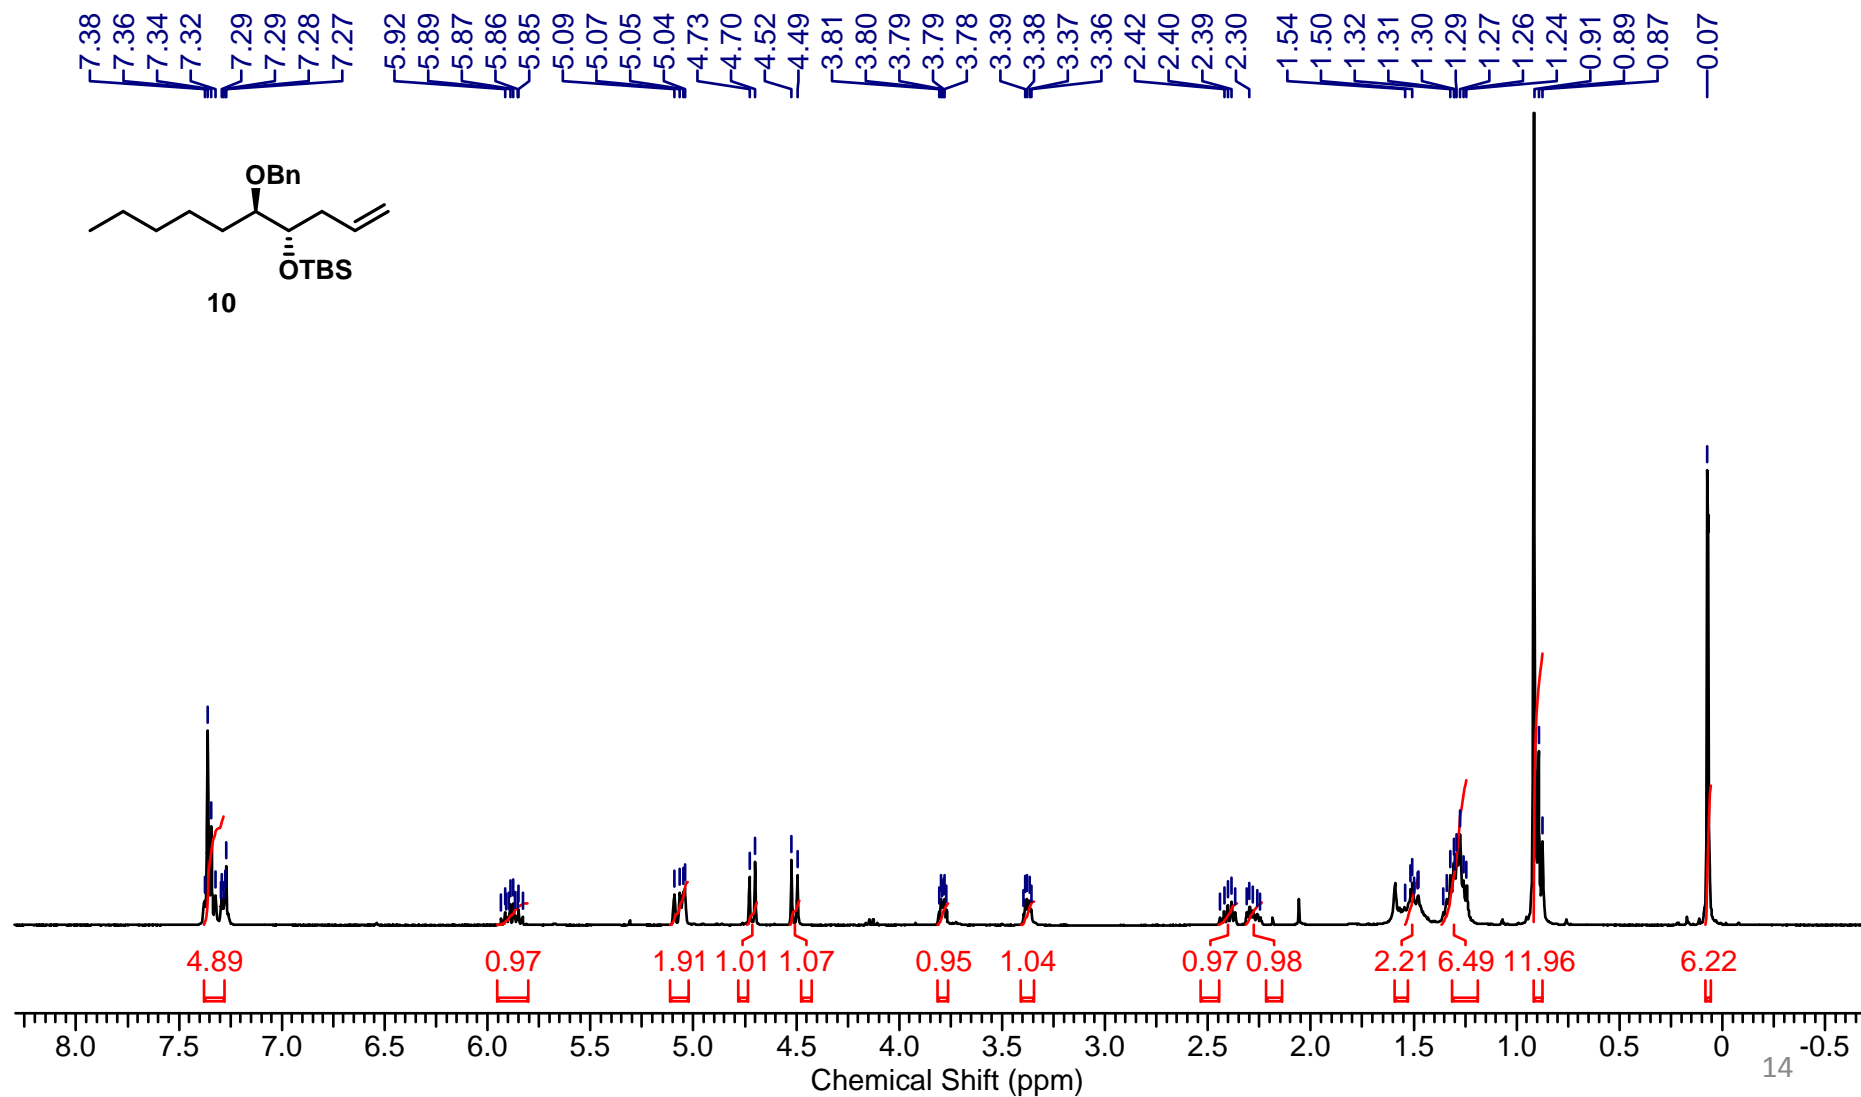

**$^{13}\text{C}$  NMR (100MHz,  $\text{CDCl}_3$ ) of the compound (((4*S*,5*R*)-5-(benzyloxy)dec-1-en-4-yl)oxy)(tert-butyl)dimethylsilane 10:**

Tue3av400#018.003.001.1r.esp

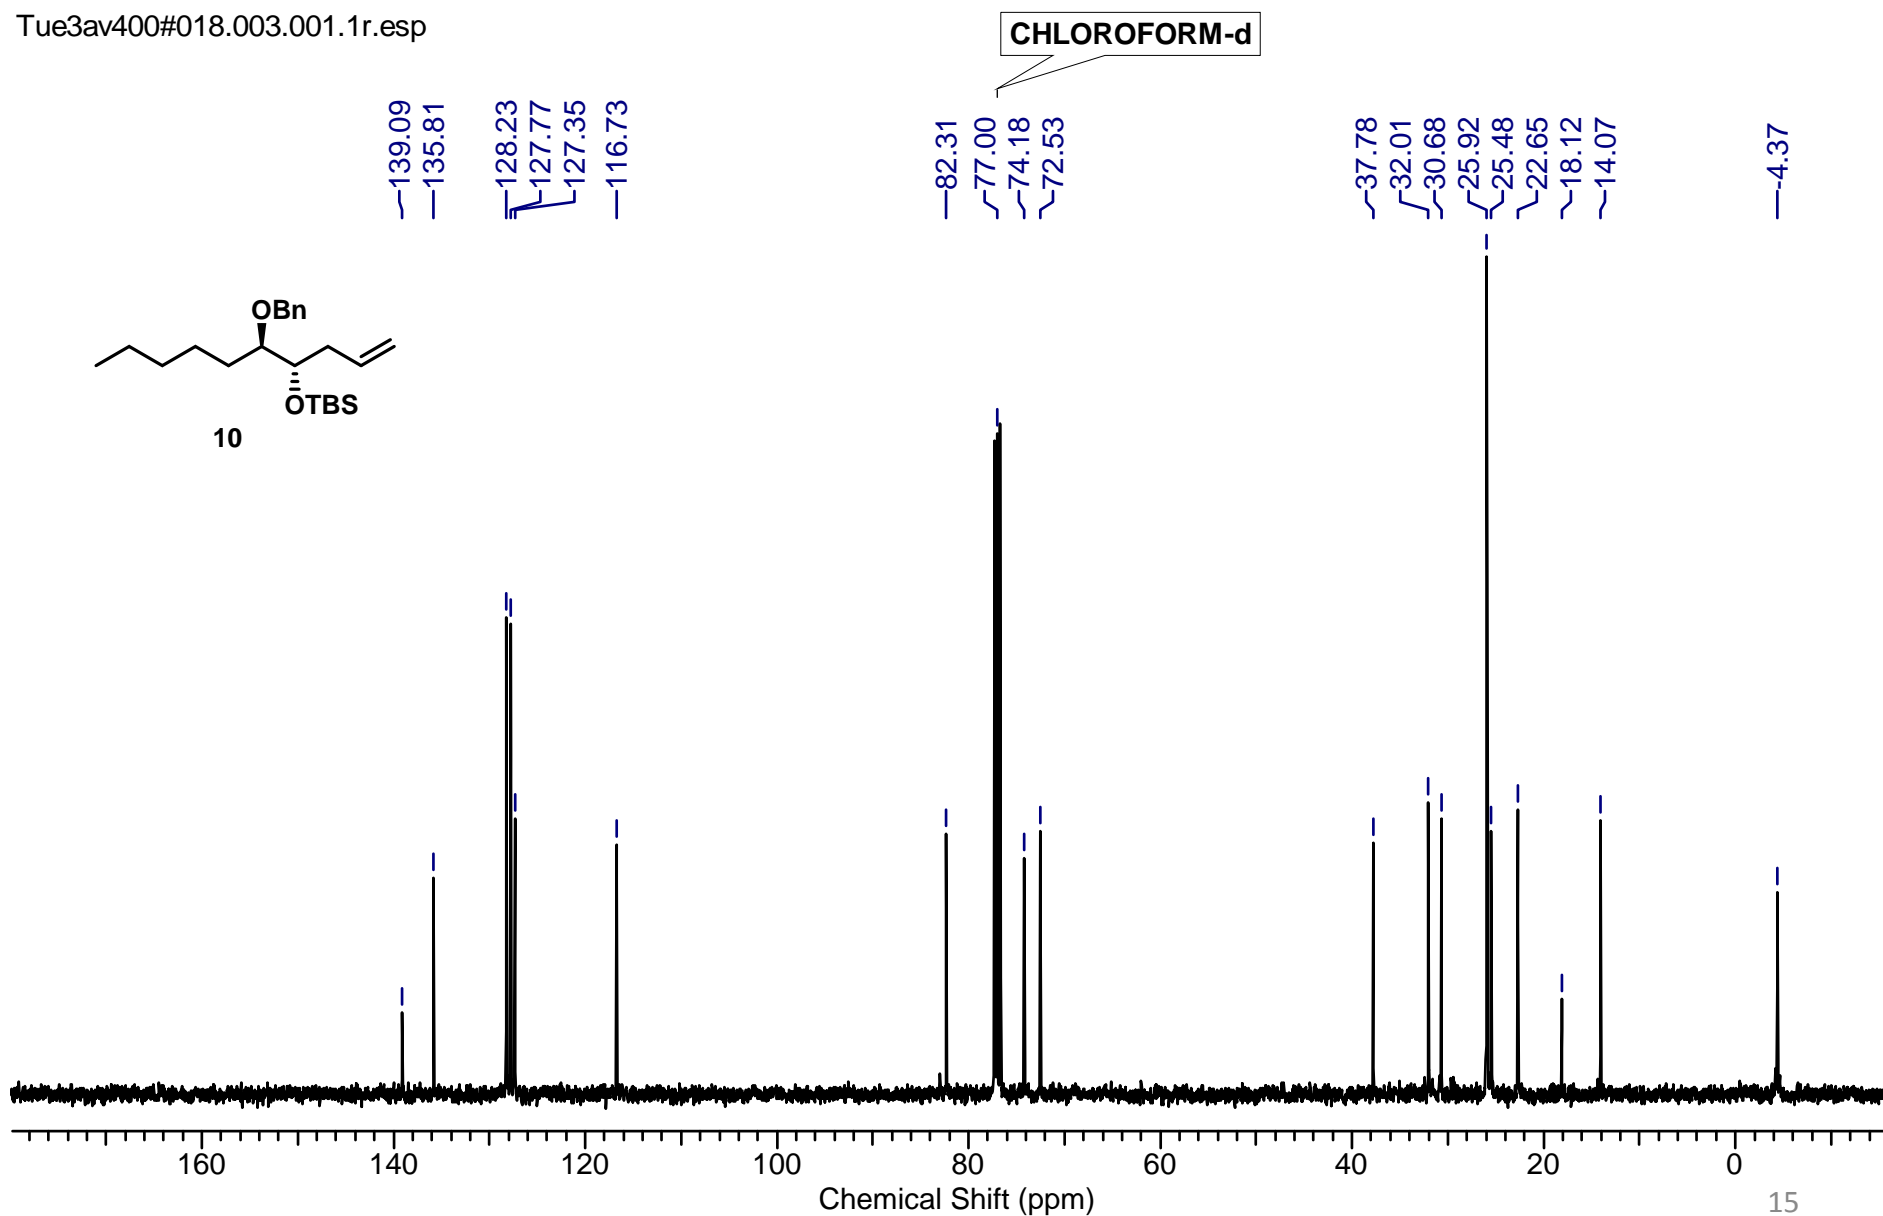

UNR-A-13 #709 RT: 3.16 AV: 1 NL: 3.97E8  
T: FTMS + p ESI Full ms [86.00-1290.00]

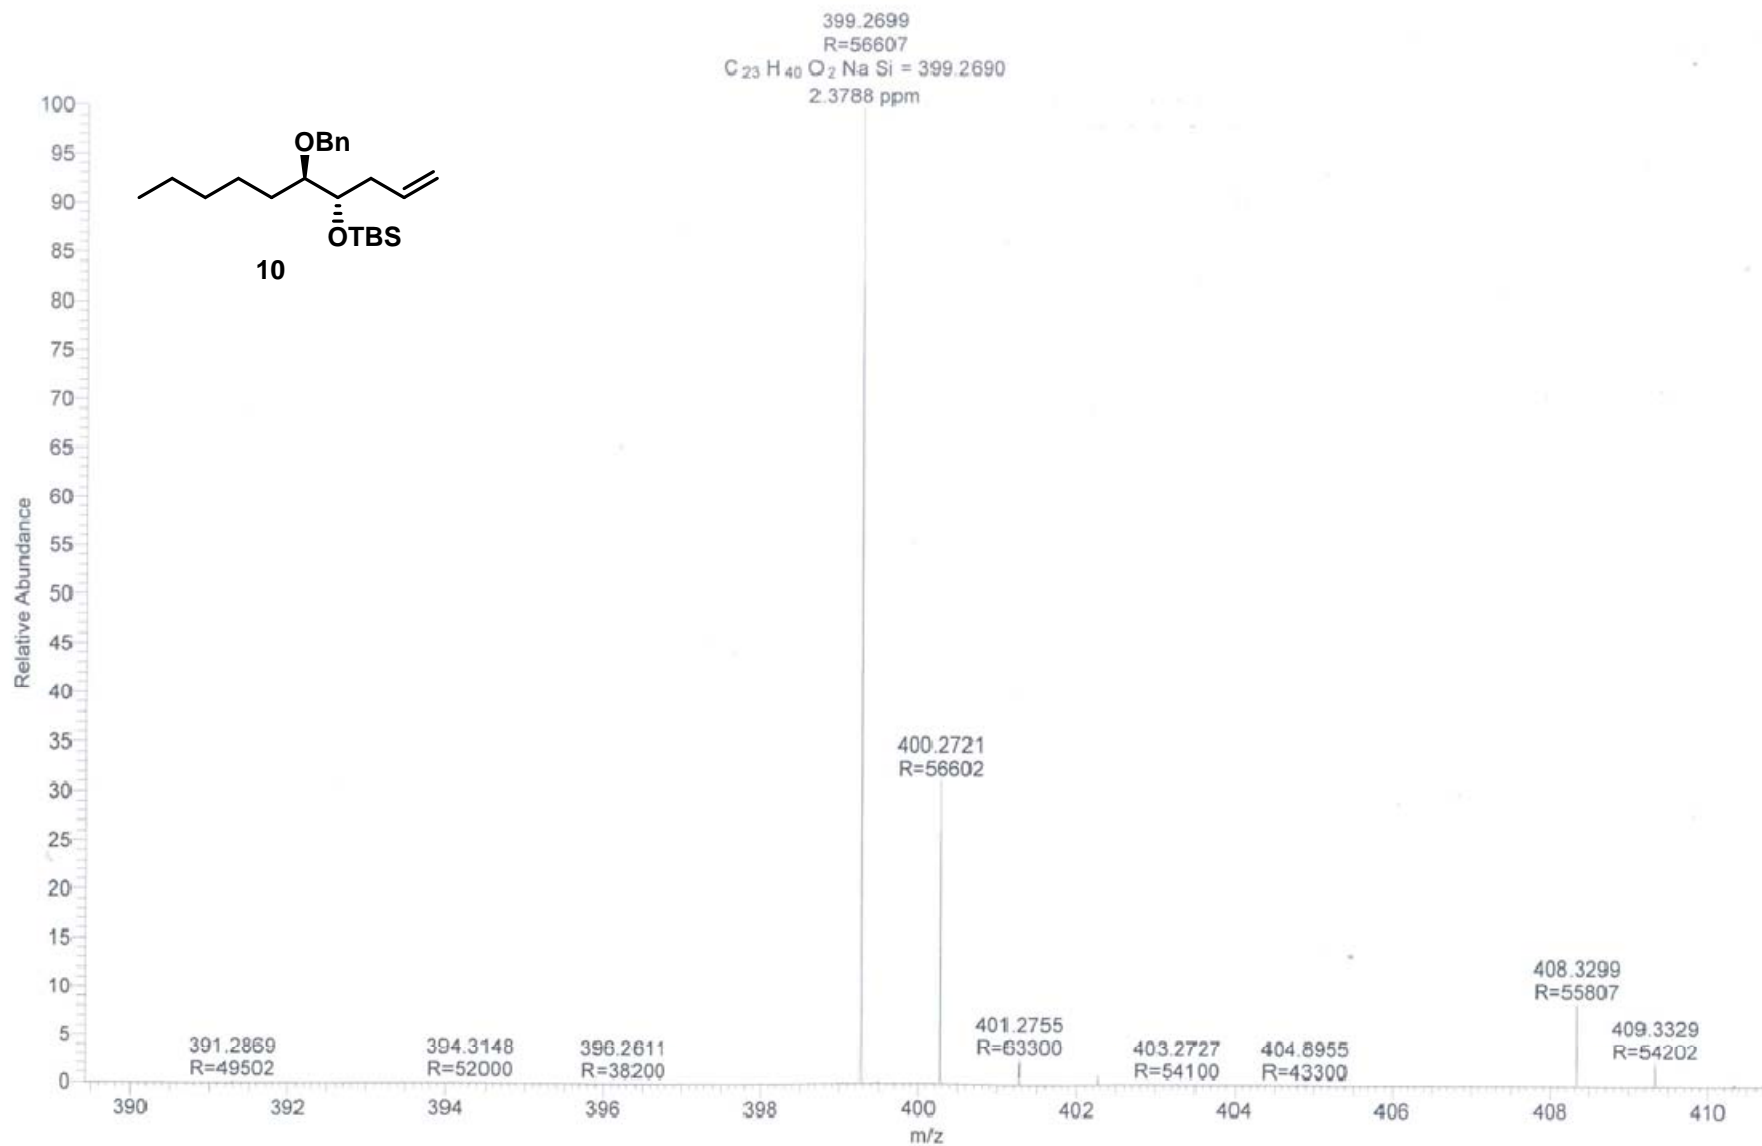



# $^1\text{H}$ NMR (500MHz, $\text{CDCl}_3$ ) of the compound (4*S*,5*R*)-5-(benzyloxy)dec-1-en-4-ol 11:

Mon2av500#013-001-001-1-esp  
CHLOROFORM-d

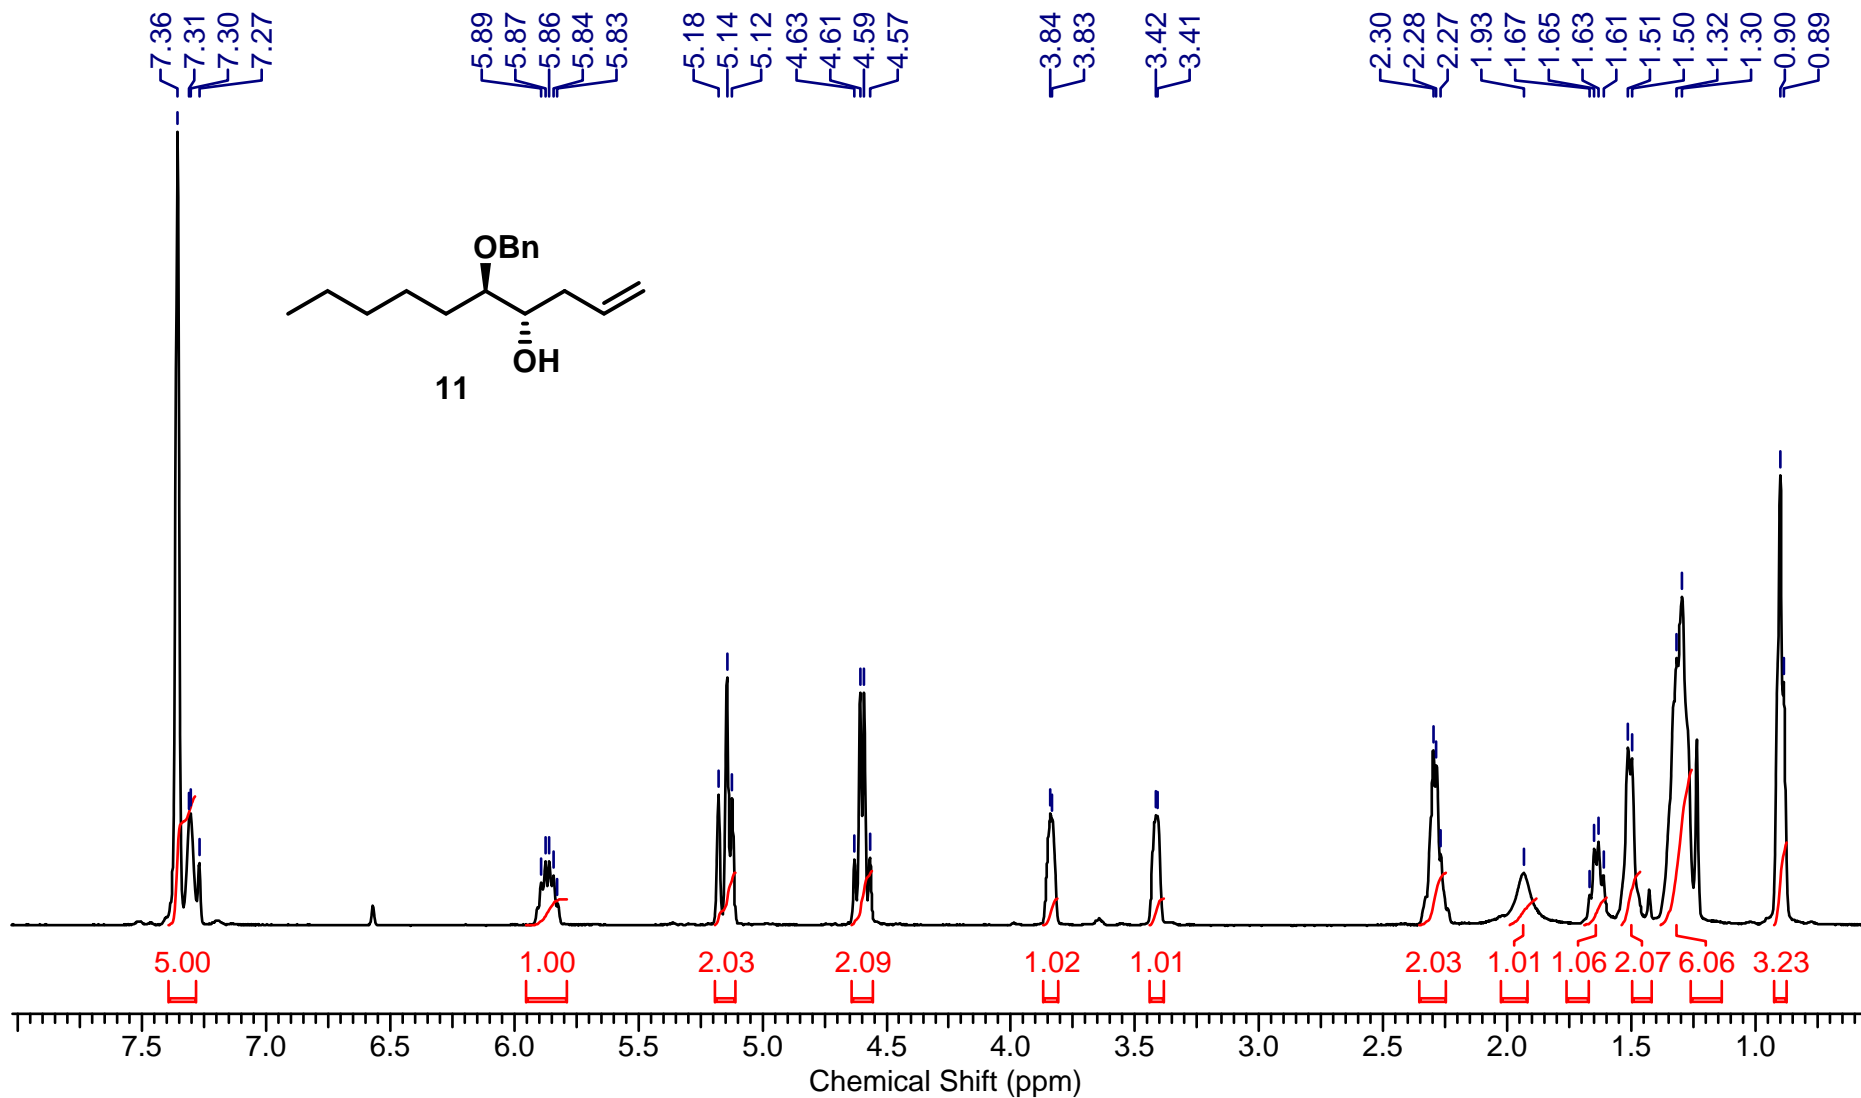

# $^{13}\text{C}$ NMR (125MHz, $\text{CDCl}_3$ ) of the compound (4*S*,5*R*)-5-(benzyloxy)dec-1-en-4-ol 11:

Mon2av500#013.003.001.1r.esp

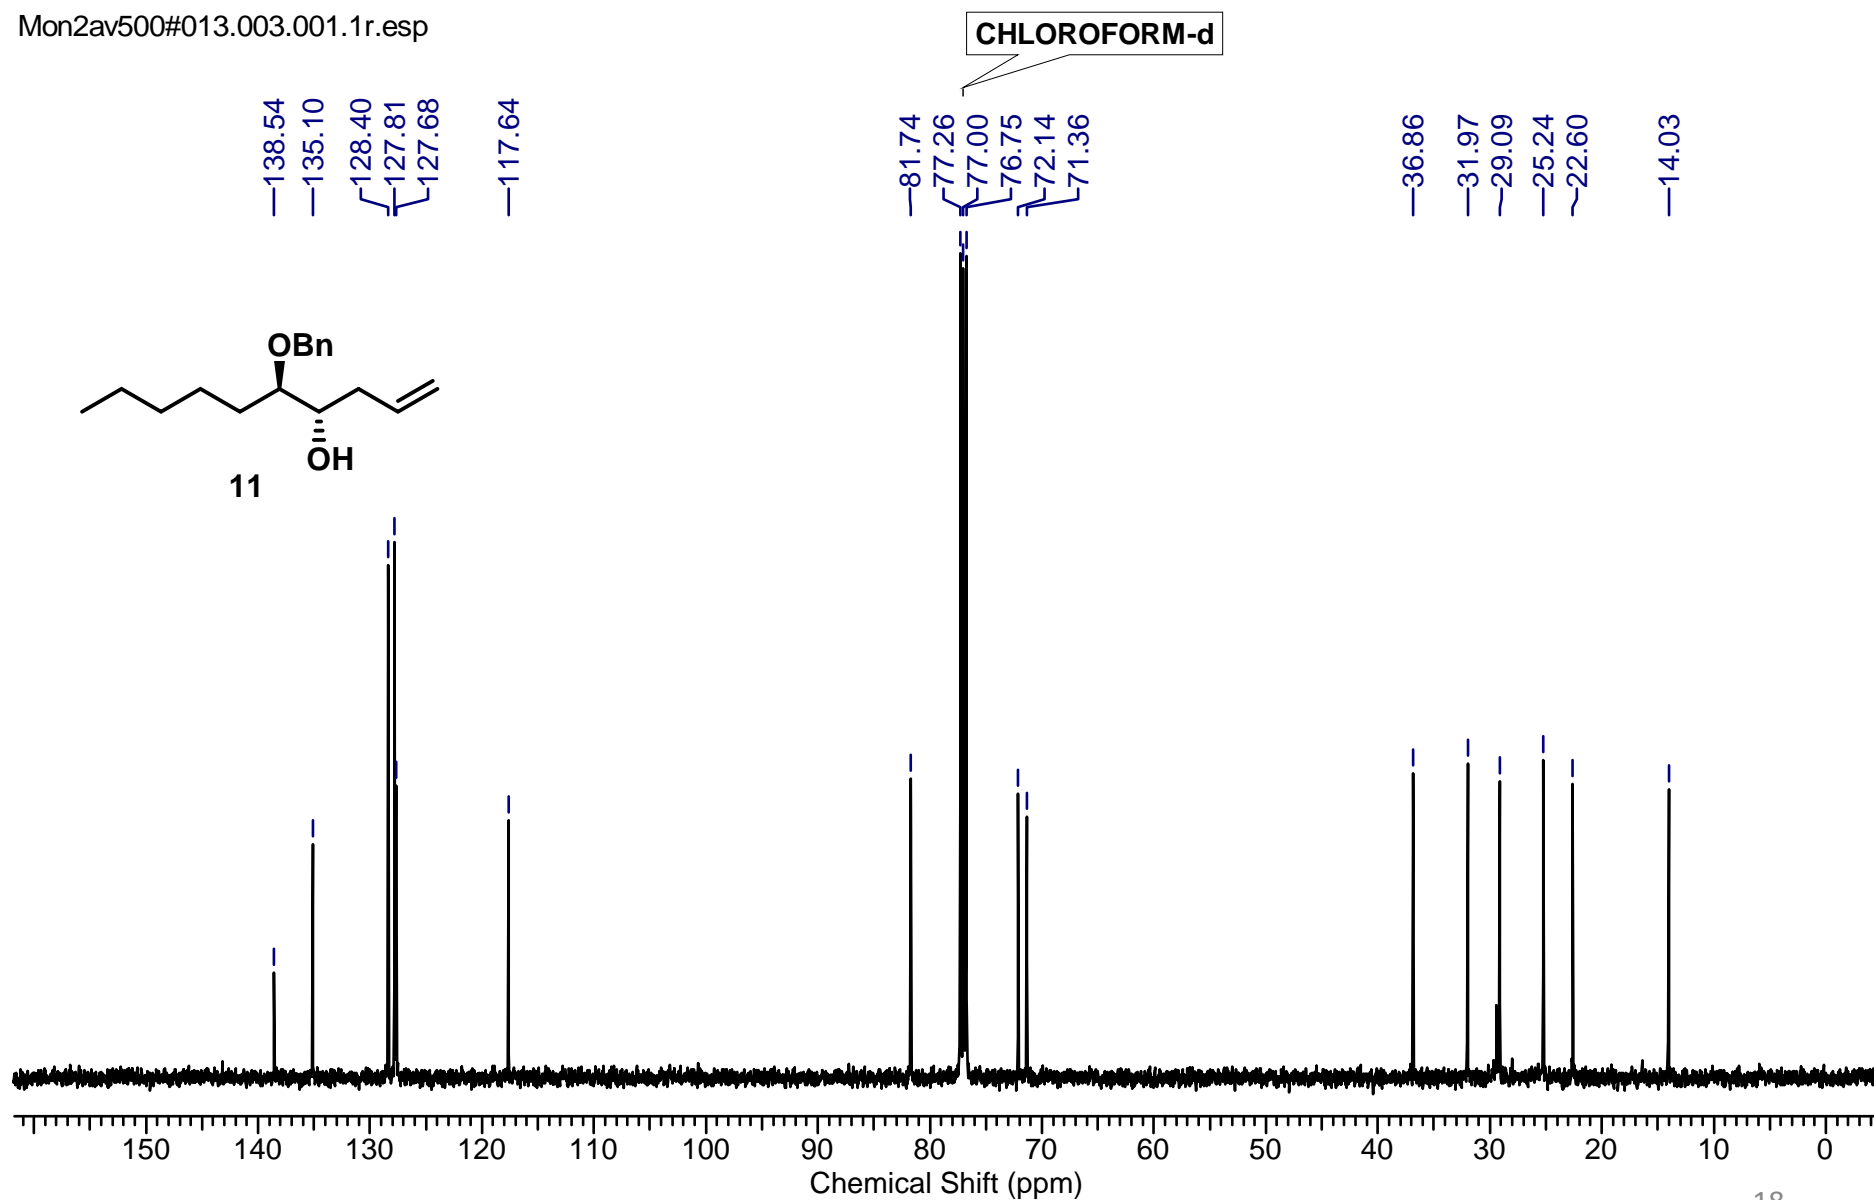

UNR-A-6 #140 RT: 0.62 AV: 1 NL: 1.64E8  
T: FTMS + p ESI Full ms [86.00-1290.00]

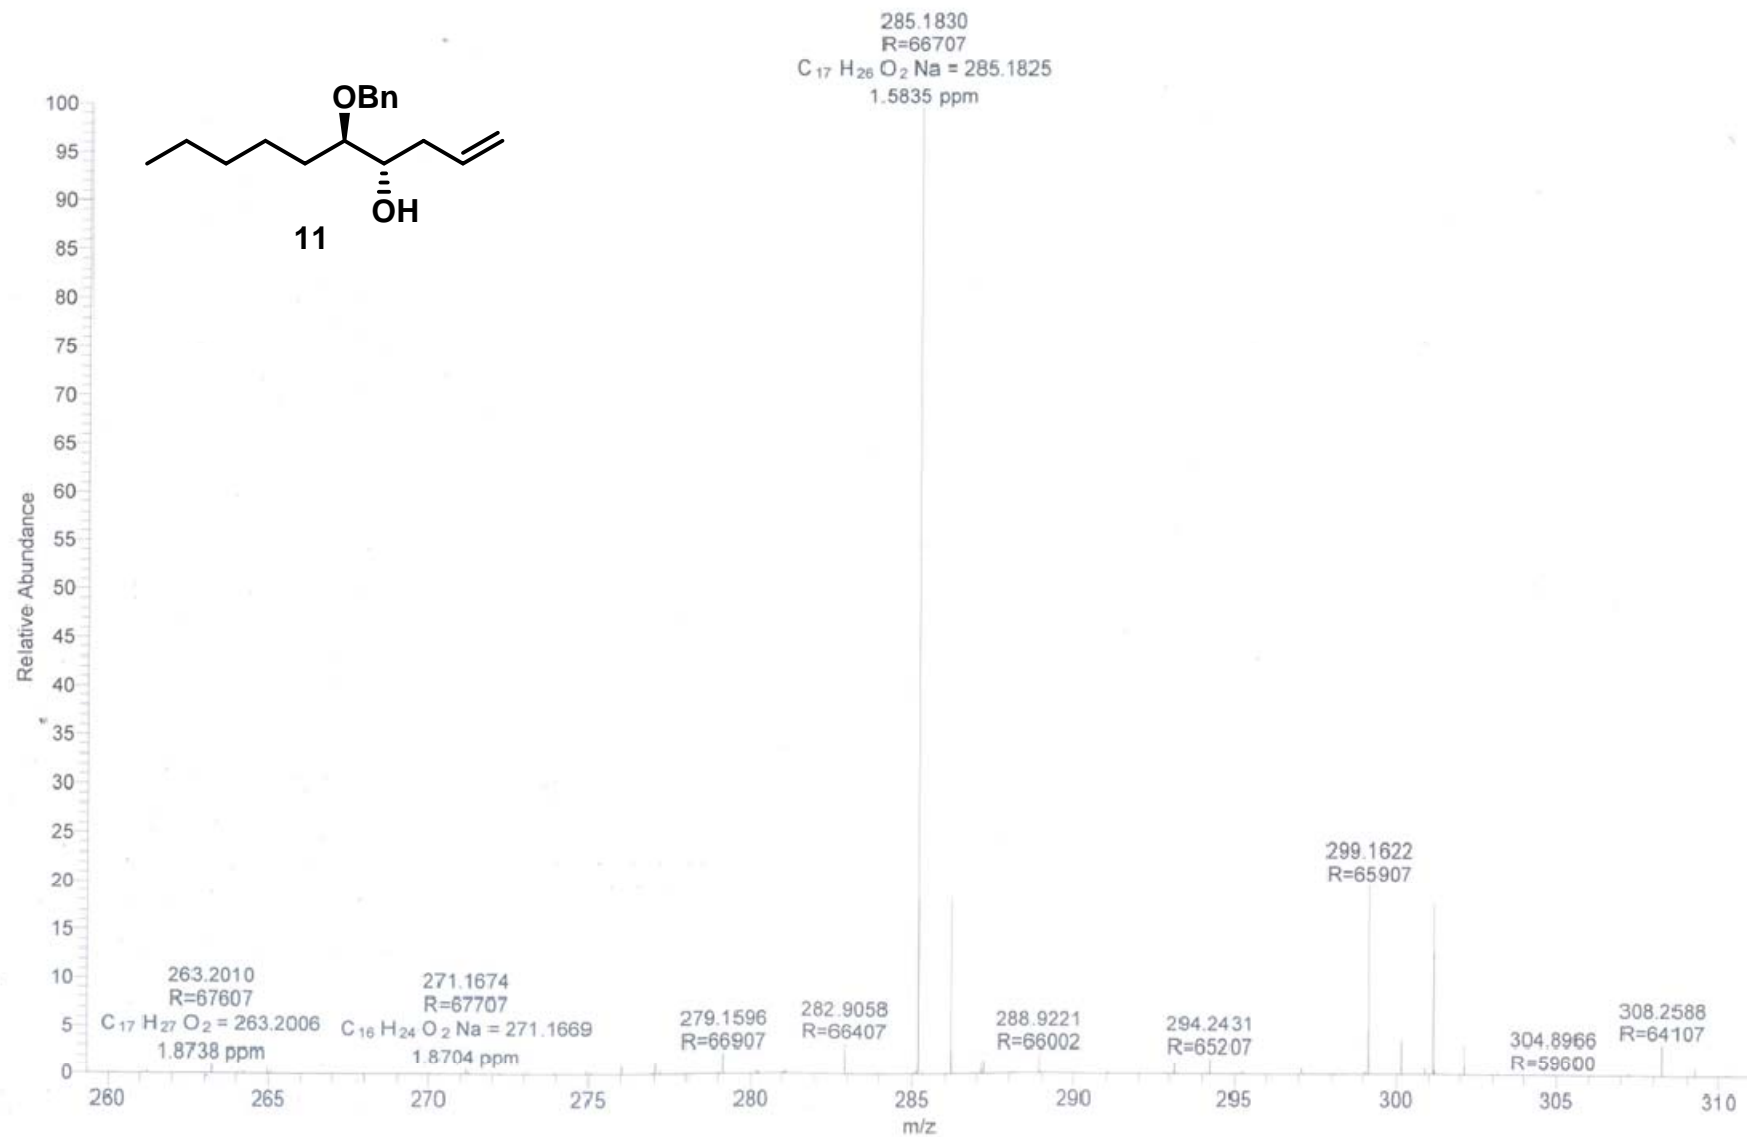

**<sup>1</sup>H NMR (500MHz, CDCl<sub>3</sub>) of the compound O-((4R,5R)-4-((tert-butyldimethylsilyl)oxy)dec-1-en-5-yl)-N-phenylhydroxylamine 12:**

Wed5av500#002001500140899  
CHLOROFORM-d

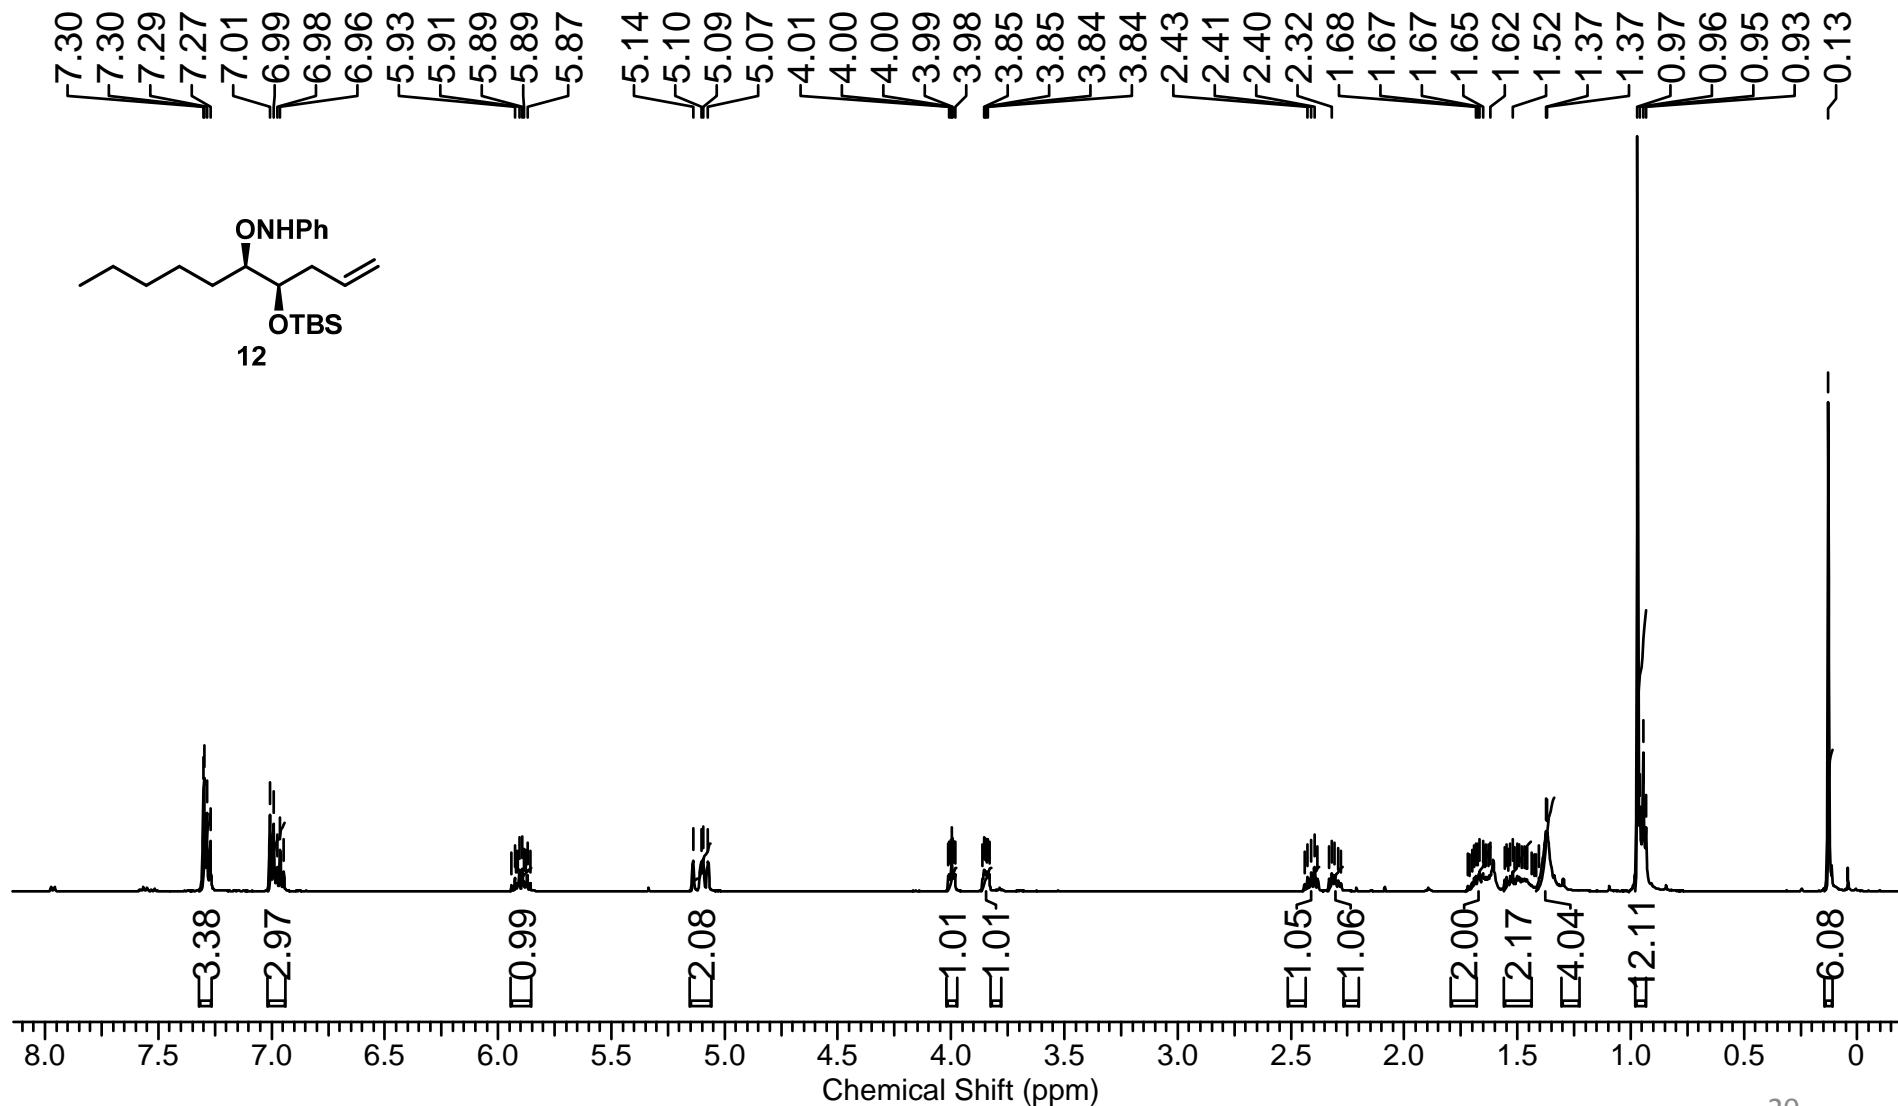

**$^{13}\text{C}$  NMR (125MHz,  $\text{CDCl}_3$ ) of the compound O-((4R,5R)-4-((tert-butyldimethylsilyl)oxy)dec-1-en-5-yl)-N-phenylhydroxylamine 12:**

Wed5av500#002.003.001.1r.esp

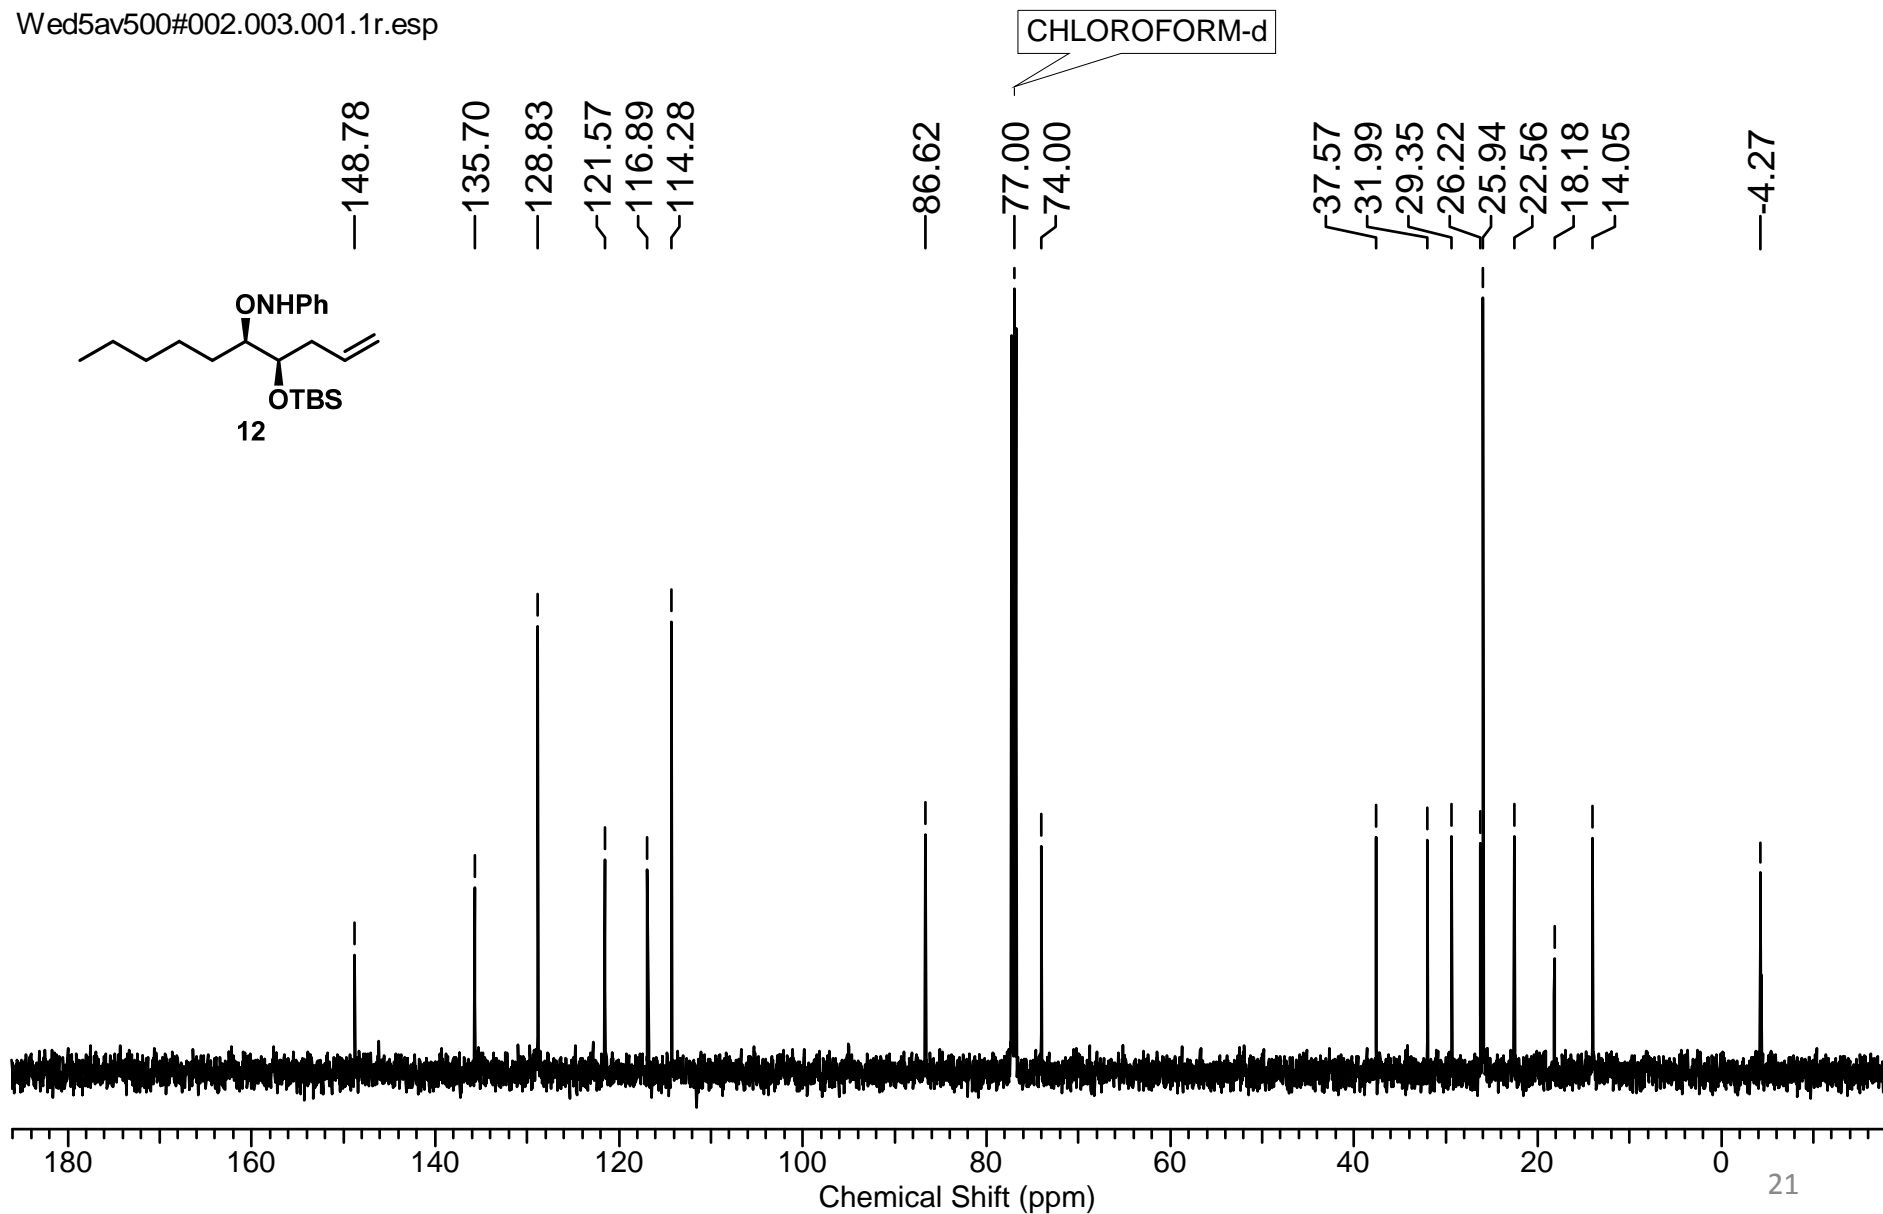

UNR-A-2 #466 RT: 2.08 AV: 1 NL: 6.39E7  
T: FTMS + p ESI Full ms [86.00-1290.00]

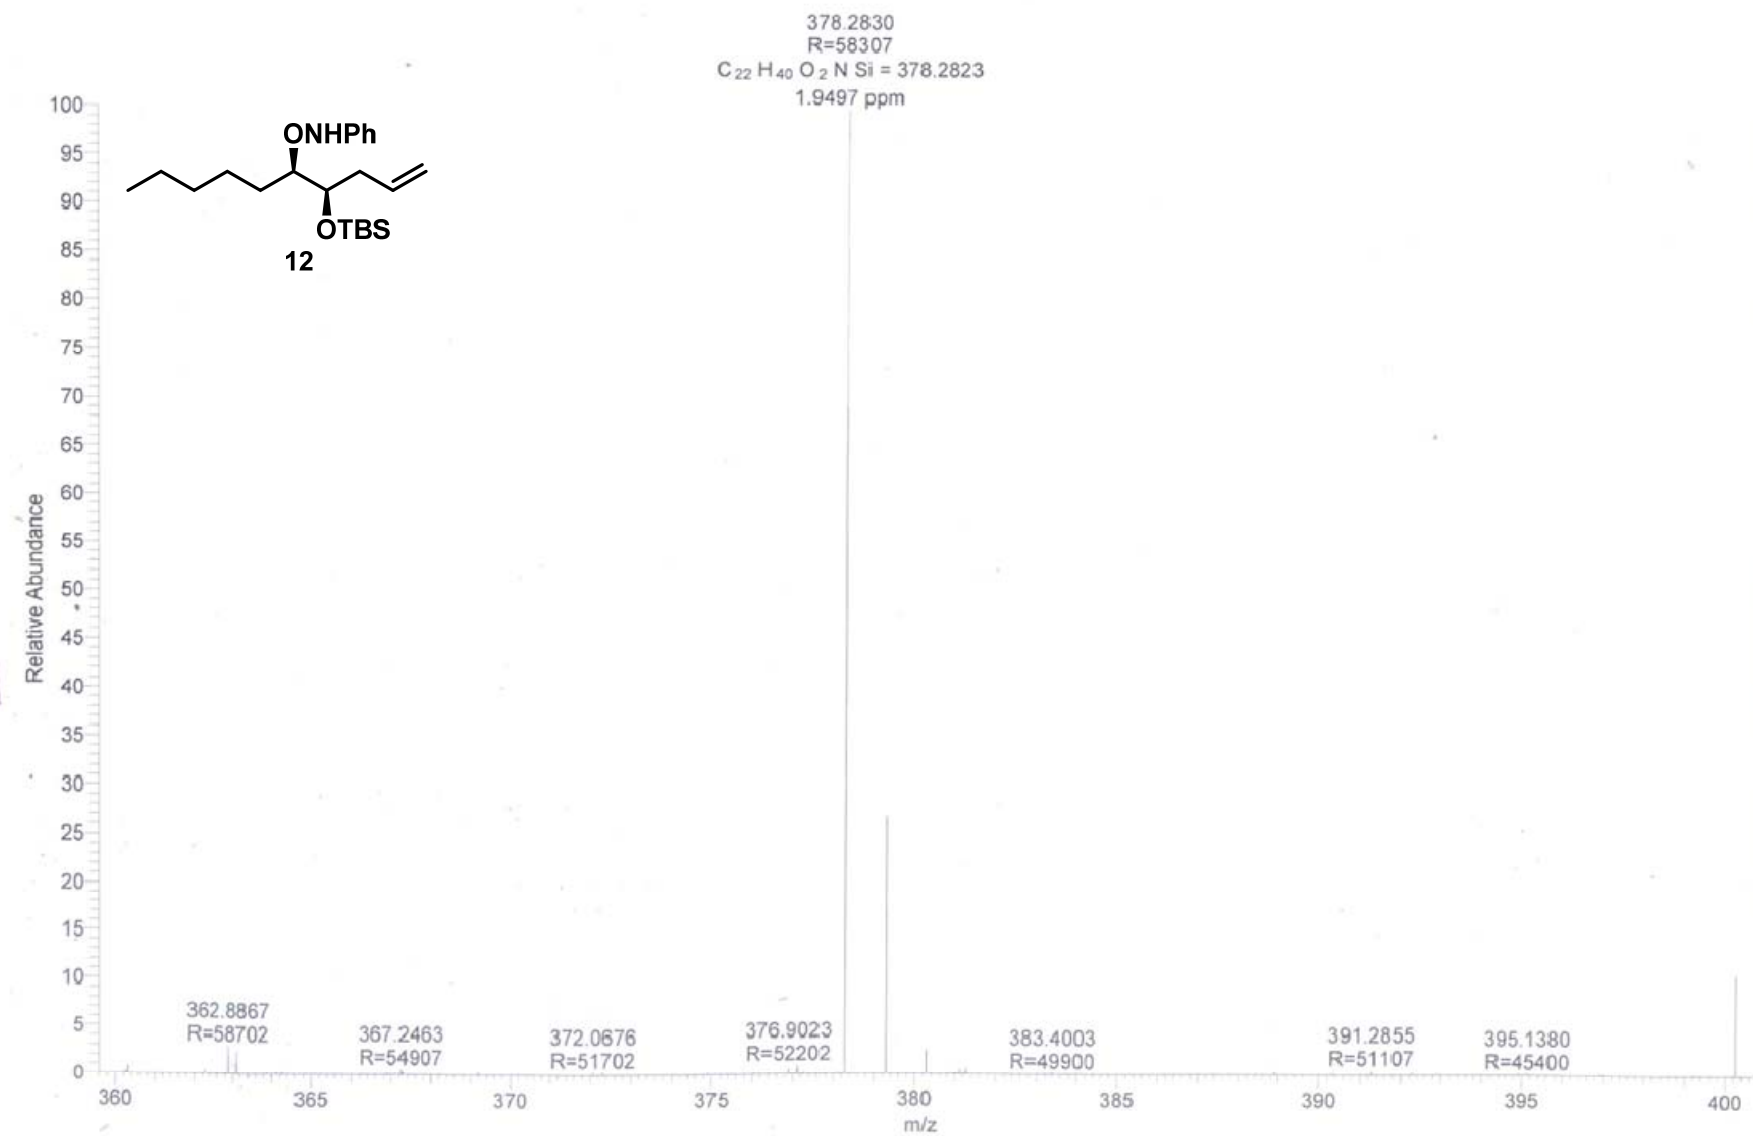

**$^1\text{H}$  NMR (500MHz,  $\text{CDCl}_3$ ) of the compound (4*R*,5*R*)-4-((tert-butyldimethylsilyl)oxy)dec-1-en-5-ol 13:**

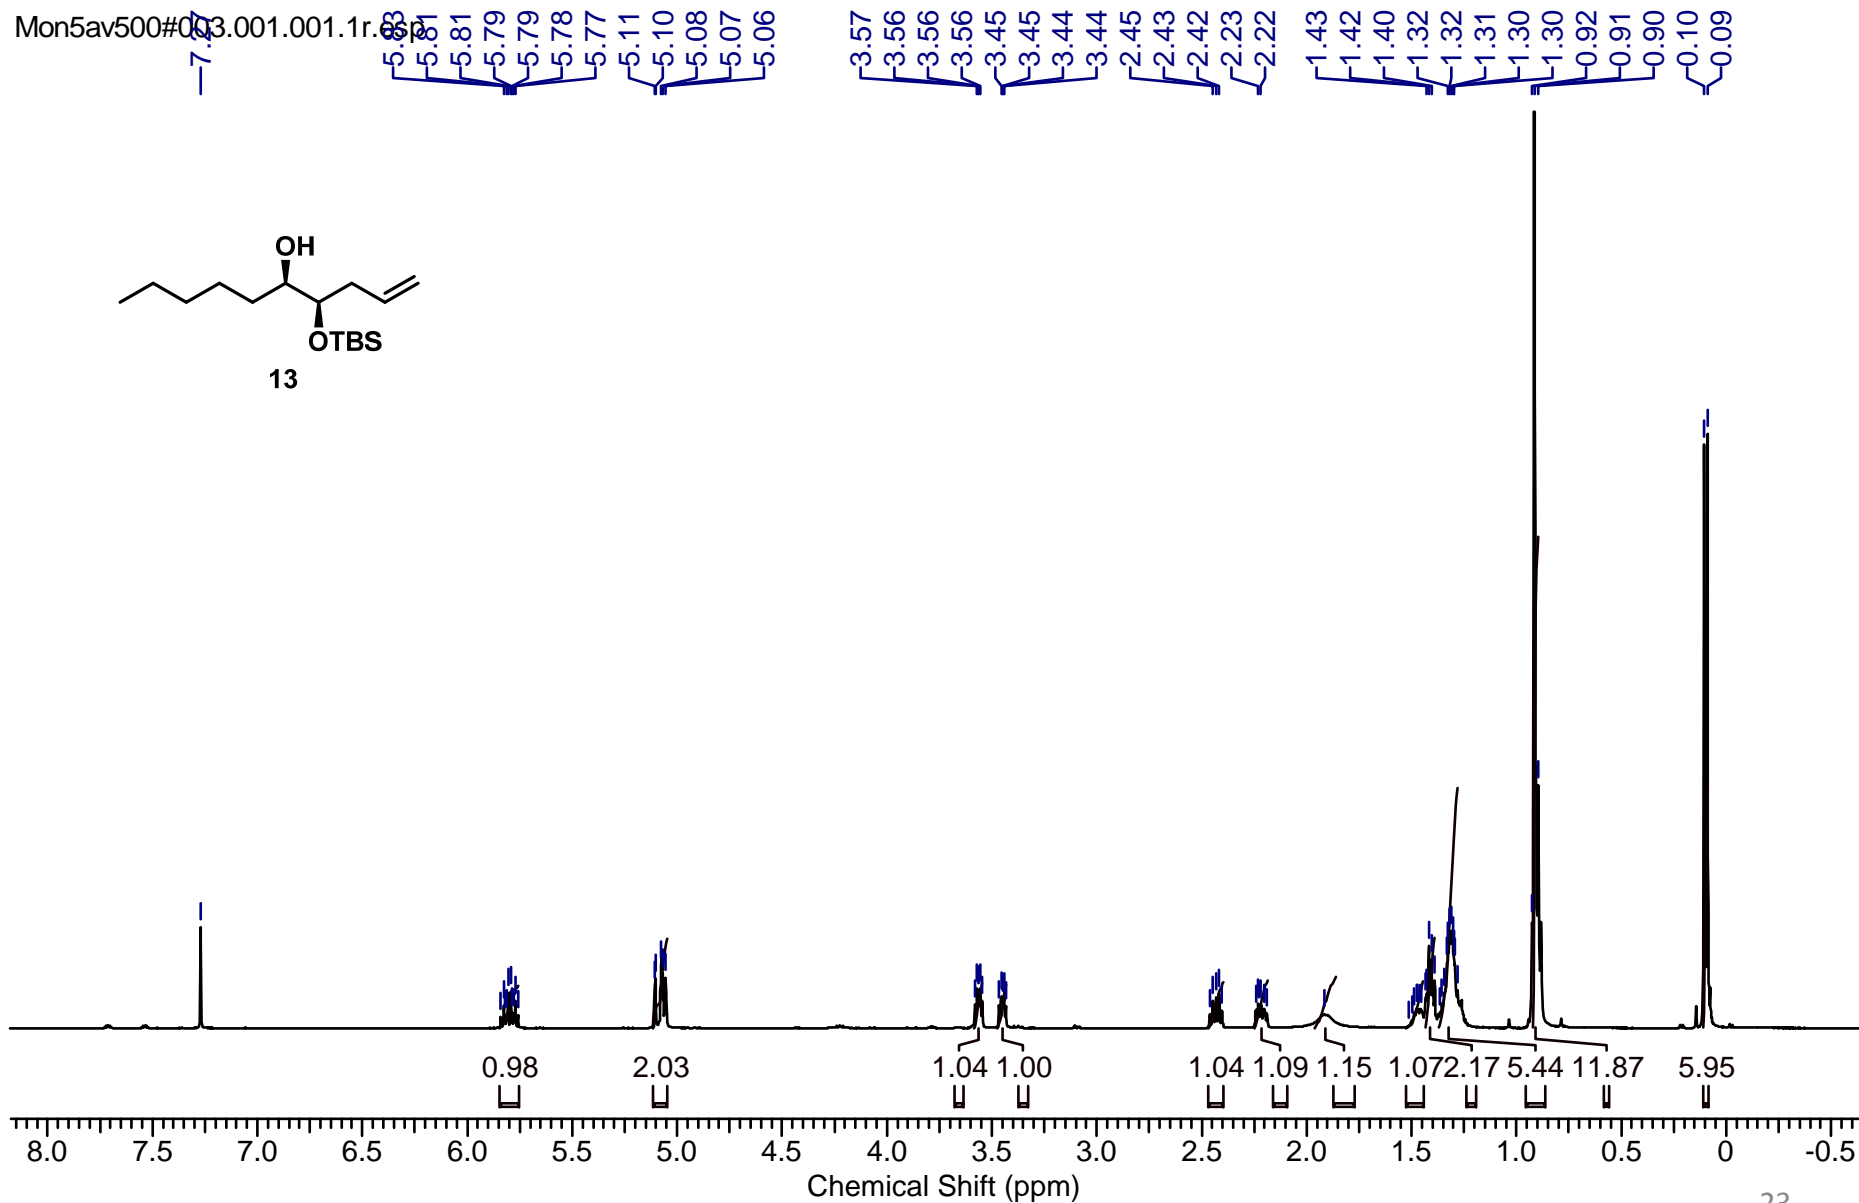

**$^{13}\text{C}$  NMR (125MHz,  $\text{CDCl}_3$ ) of the compound (4*R*,5*R*)-4-((tert-butyldimethylsilyl)oxy)dec-1-en-5-ol 13:**

Mon5av500#003.003.001.1r.e

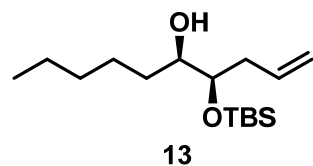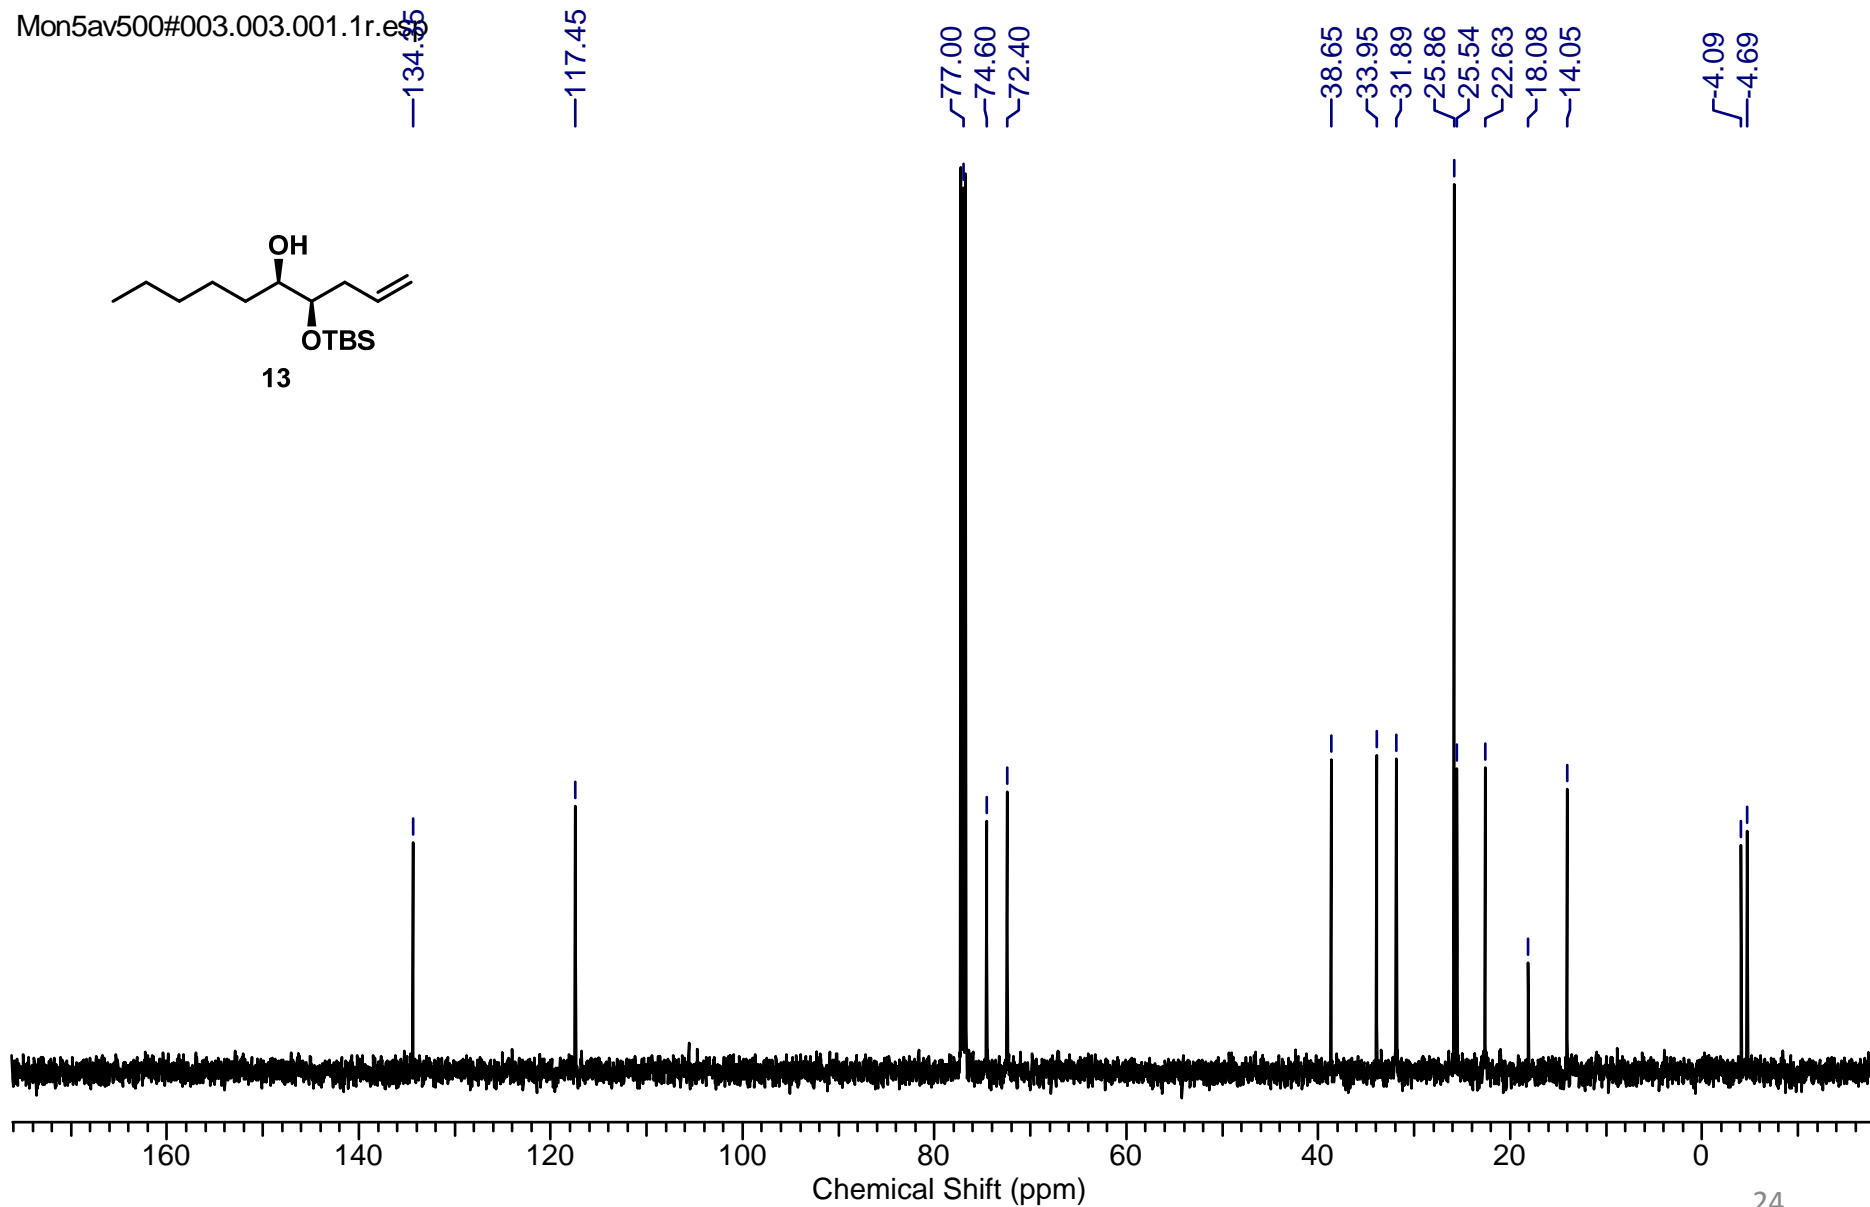



UNR-A-3 #254 RT: 1.13 AV: 1 NL: 1.12E9  
T: FTMS + p ESI Full ms [86.00-1290.00]

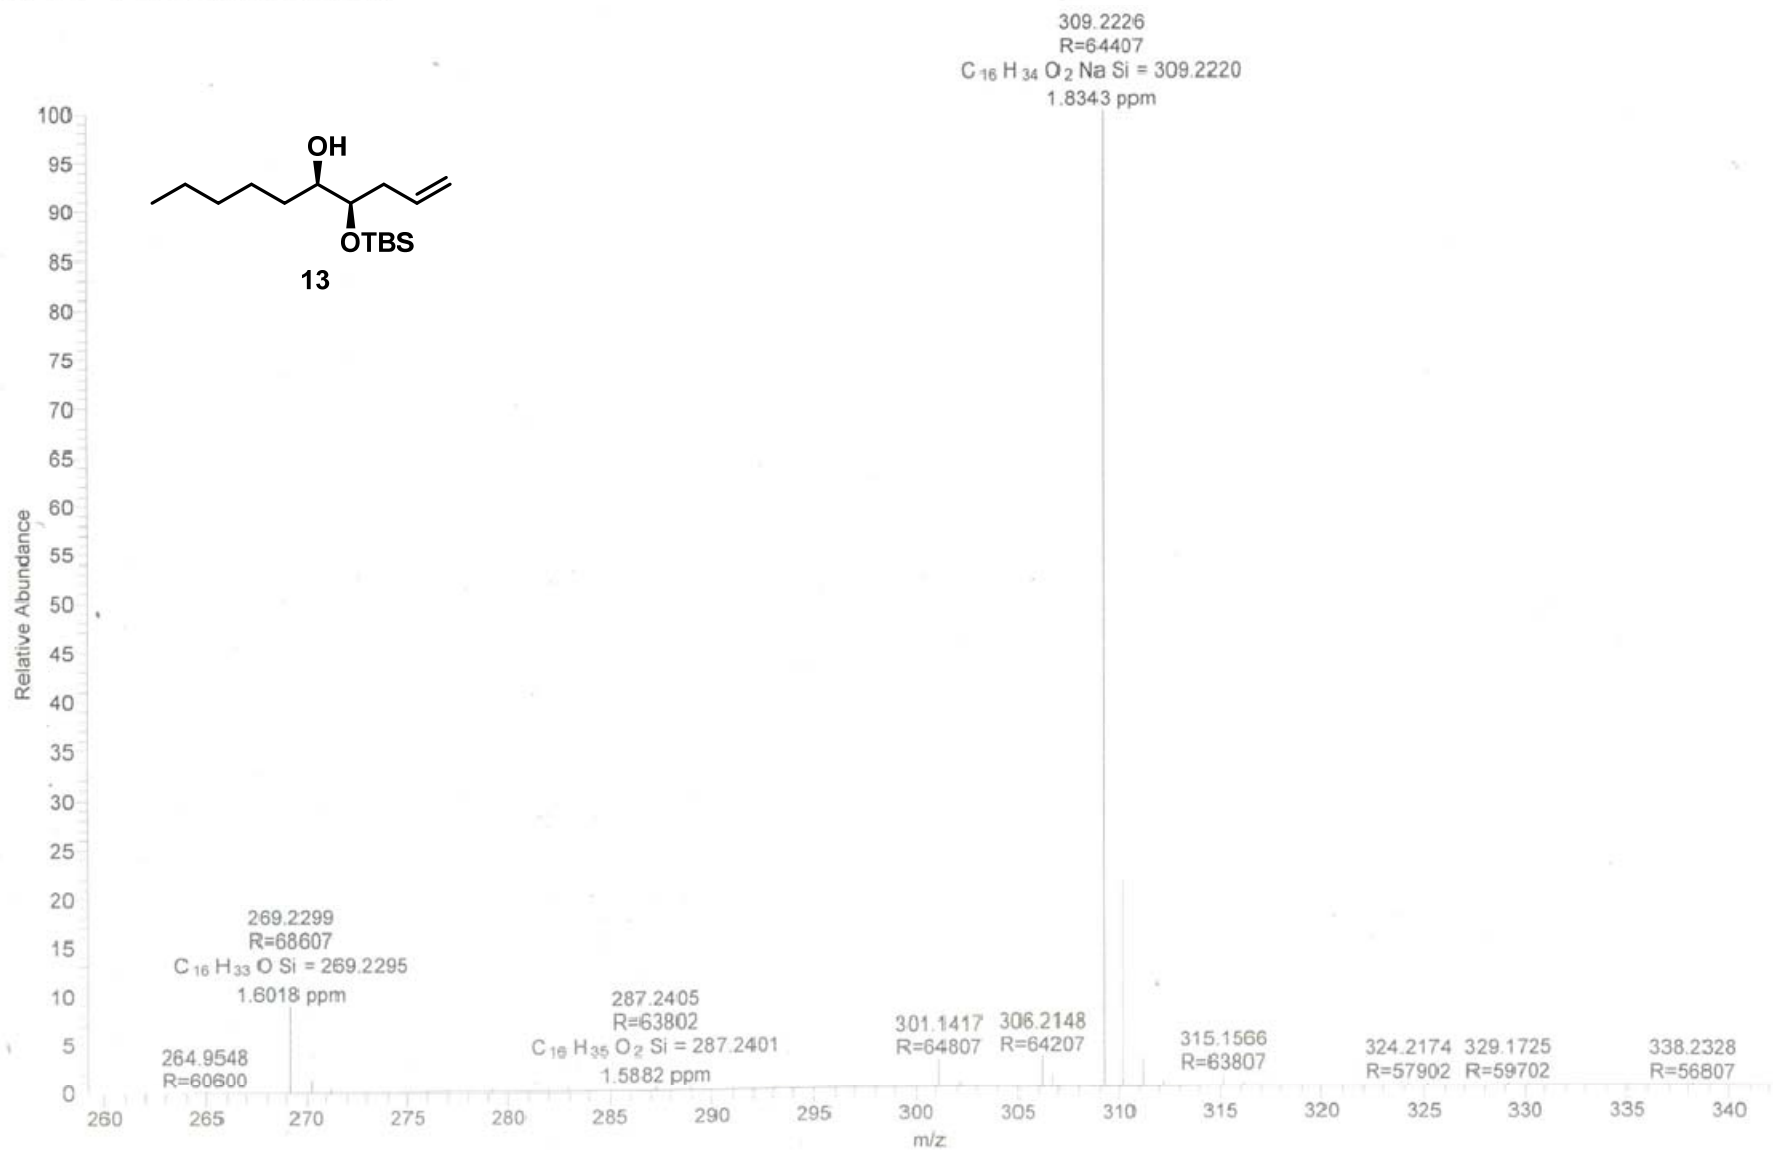

**$^1\text{H}$  NMR (500MHz,  $\text{CDCl}_3$ ) of the compound (((4*R*,5*R*)-5-(benzyloxy)dec-1-en-4-yl)oxy)(tert-butyl)dimethylsilane 14:**

Wed4av500#019\_A\_417\_001\_001\_1r.esp

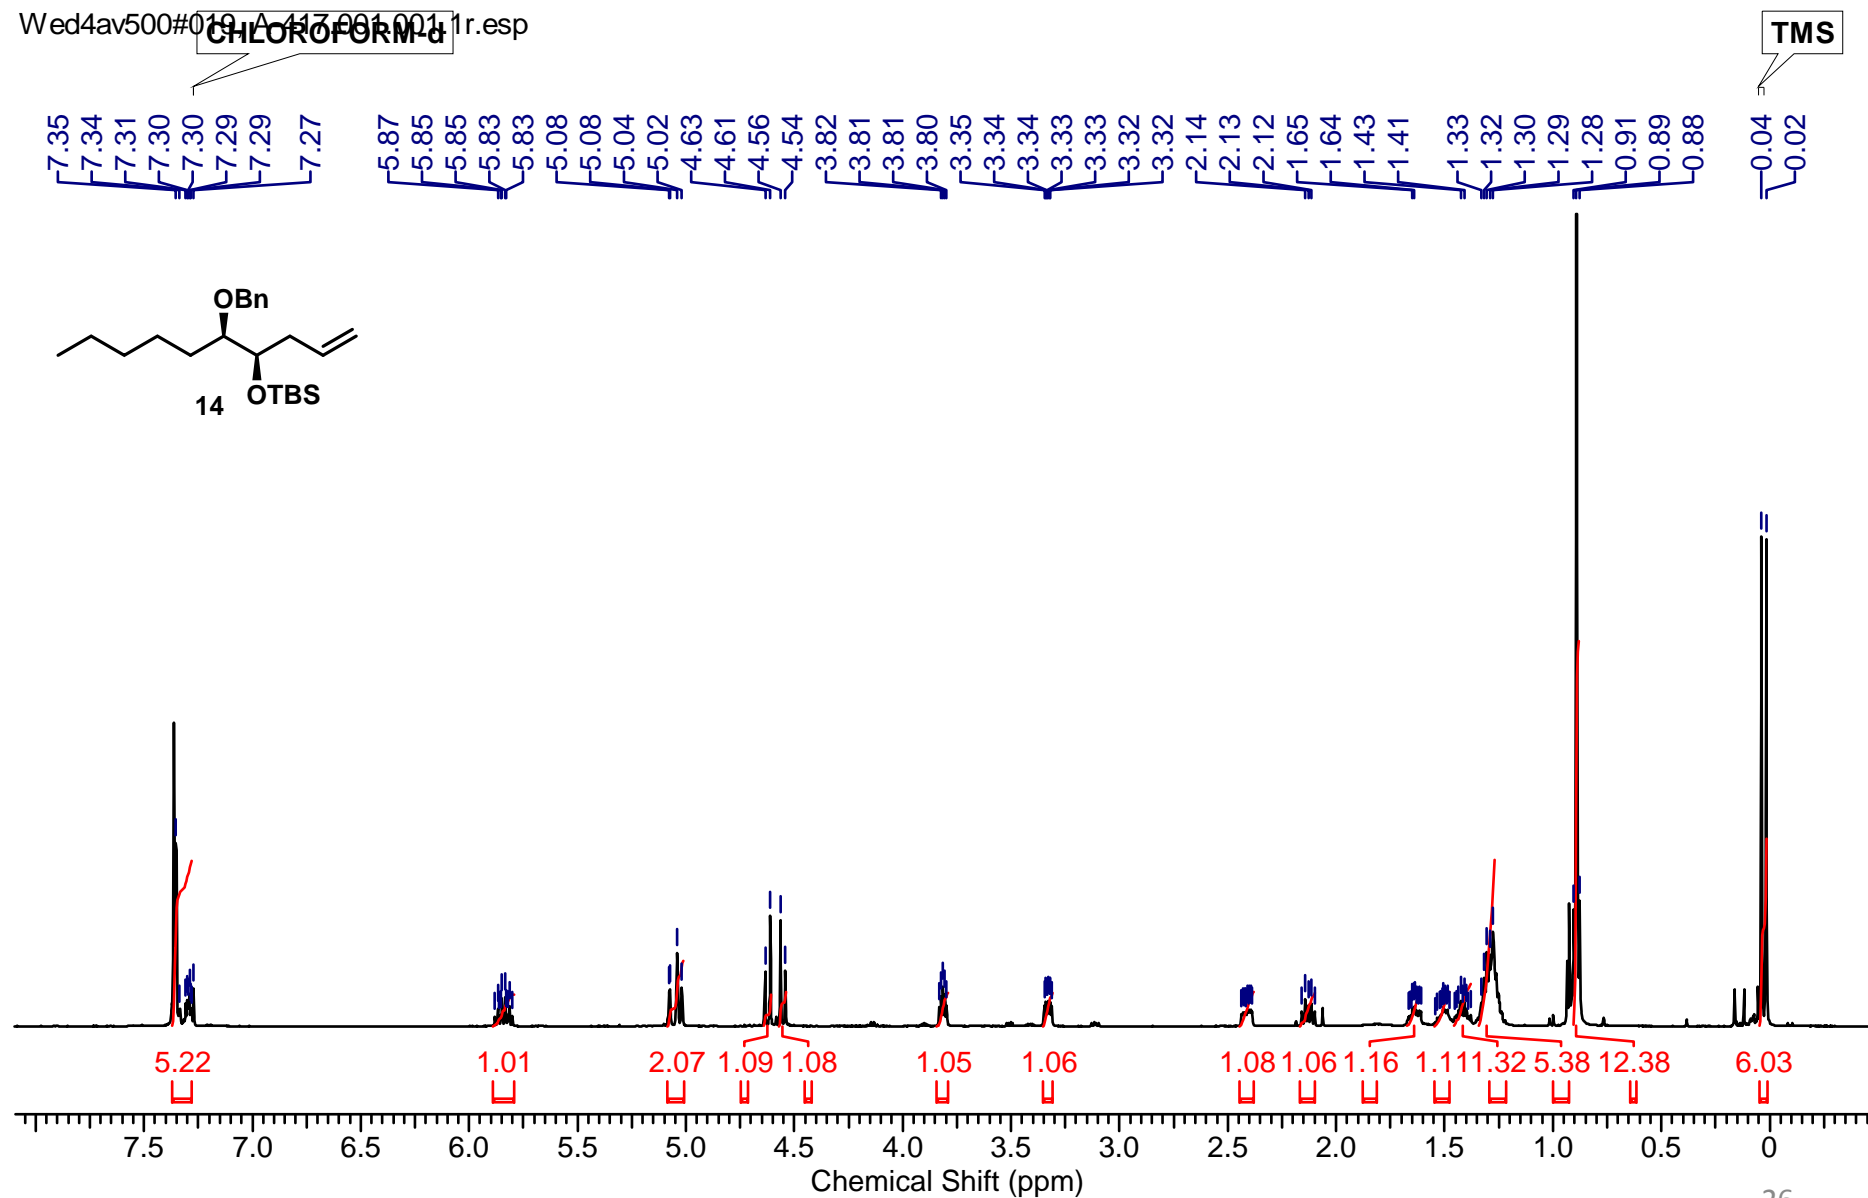

**$^{13}\text{C}$  NMR (125MHz,  $\text{CDCl}_3$ ) of the compound (((4*R*,5*R*)-5-(benzyloxy)dec-1-en-4-yl)oxy)(tert-butyl)dimethylsilane 14:**

Wed4av500#019, A-417.003.001.1r.esp

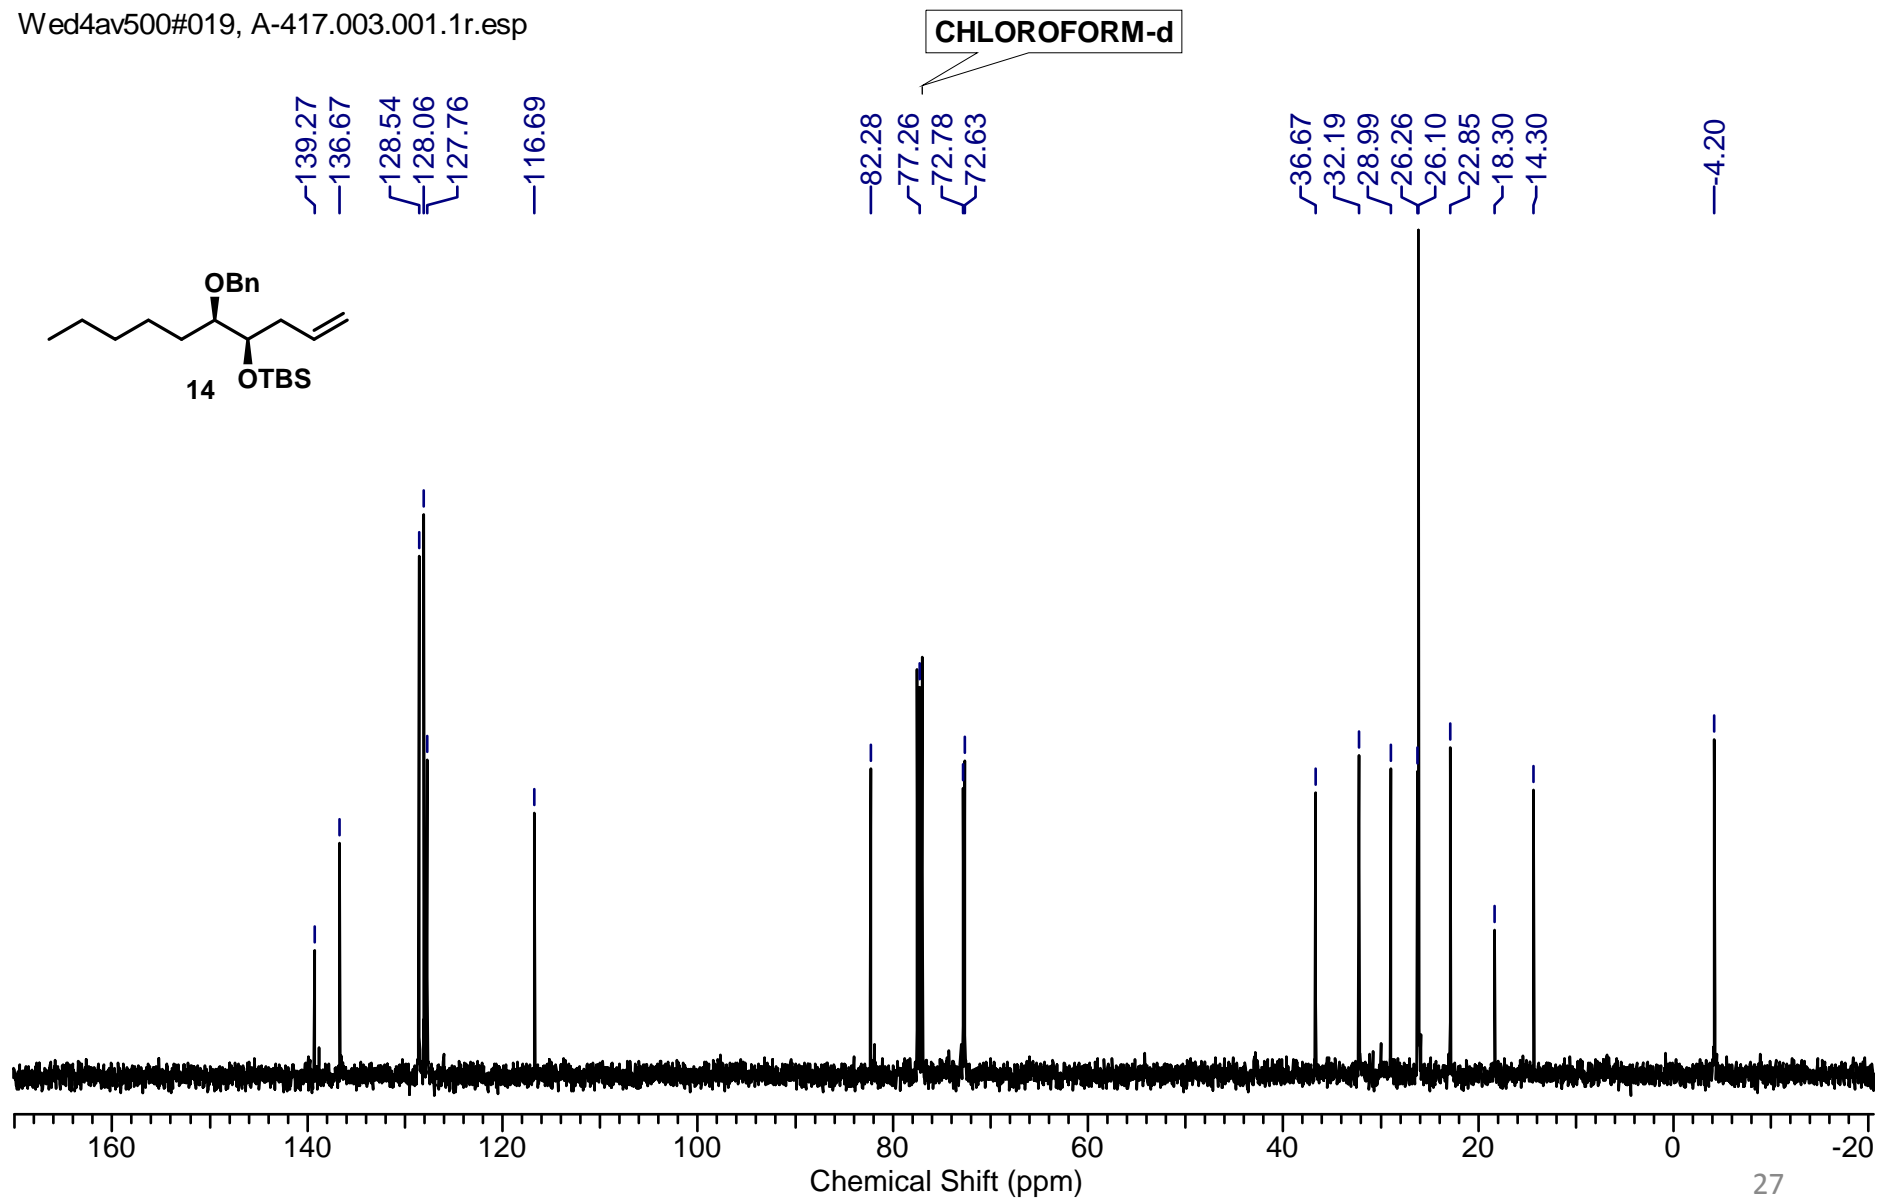

UNR-A-4 #653 RT: 2.91 AV: 1 NL: 3.02E8  
T: FTMS + p ESI Full ms [00.00-1290.00]

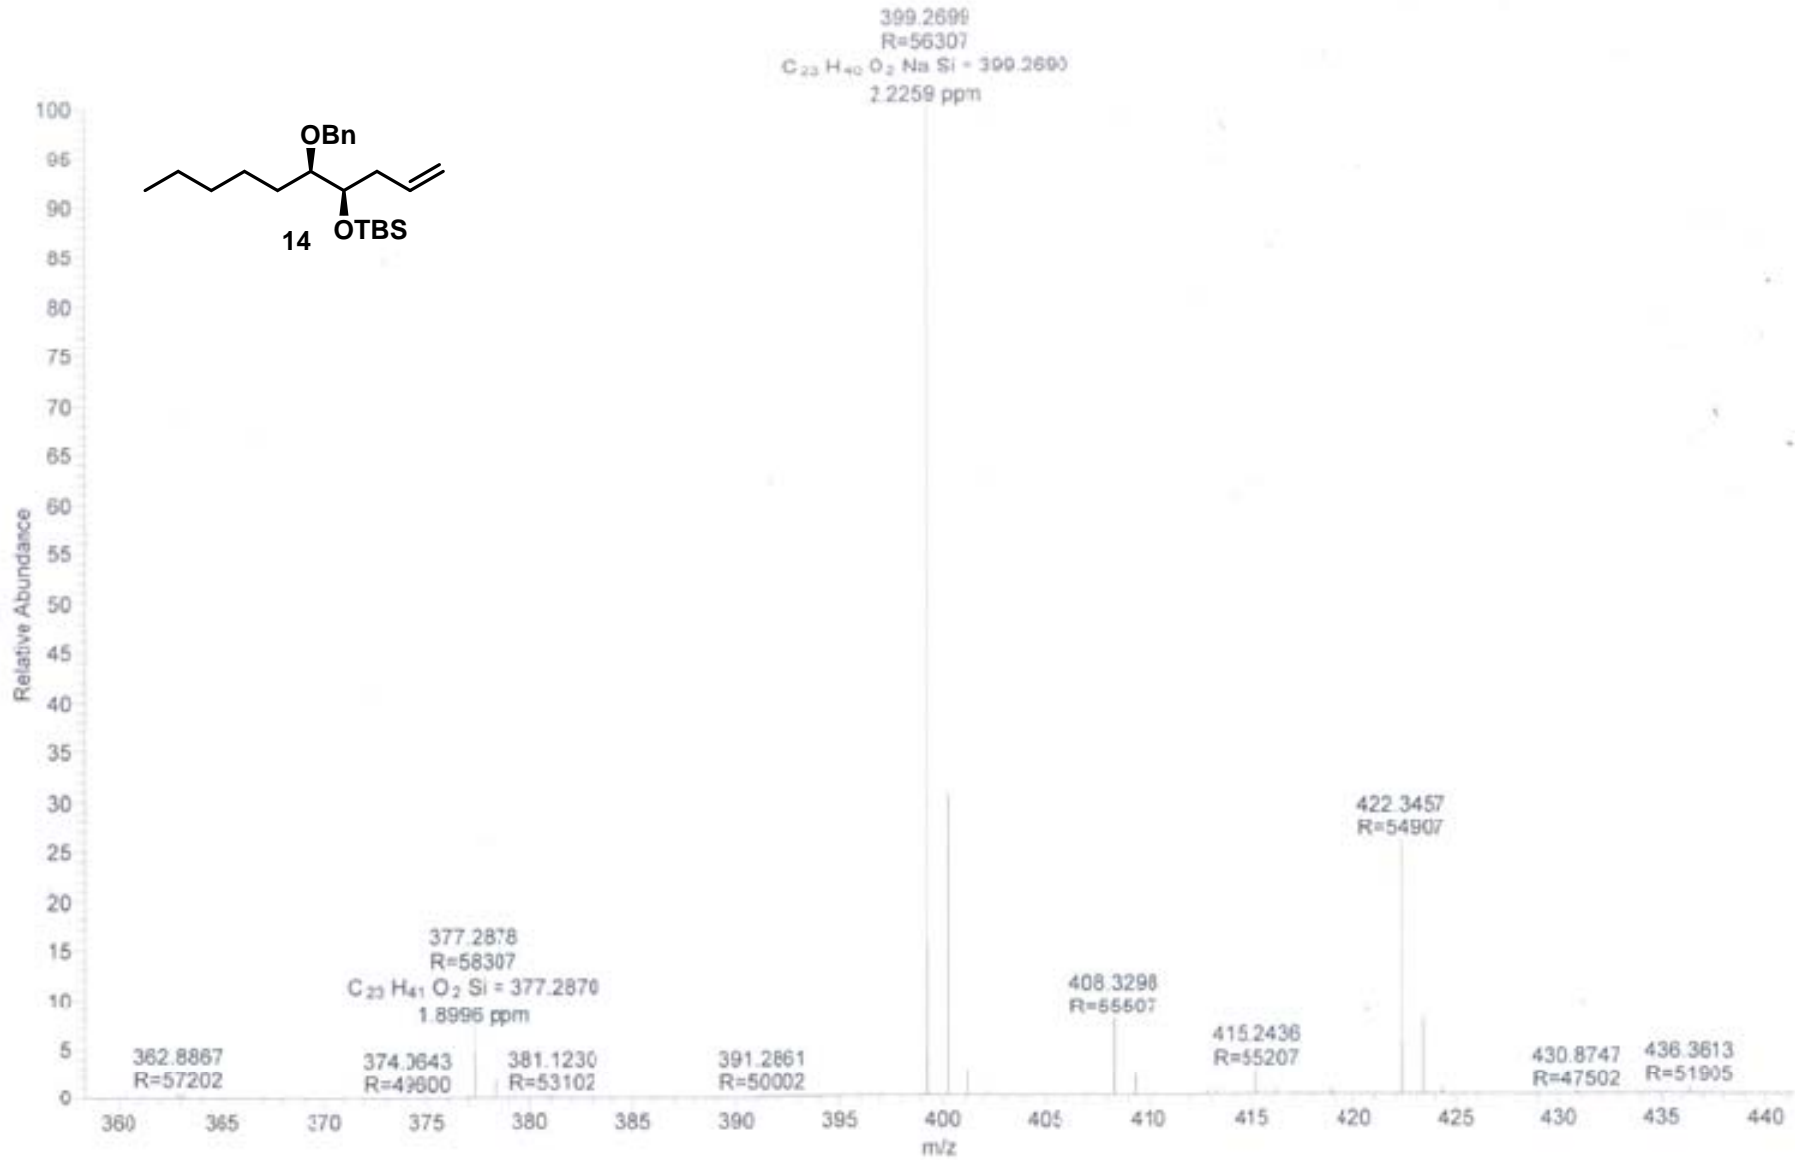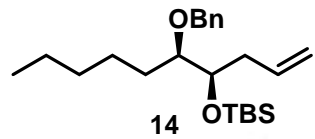

**$^1\text{H}$  NMR (400MHz,  $\text{CDCl}_3$ ) of the compound (4*R*,5*R*)-5-(benzyloxy)dec-1-en-4-ol 15:**

Sat1av400#00500100111931  
CHLOROFORM-d

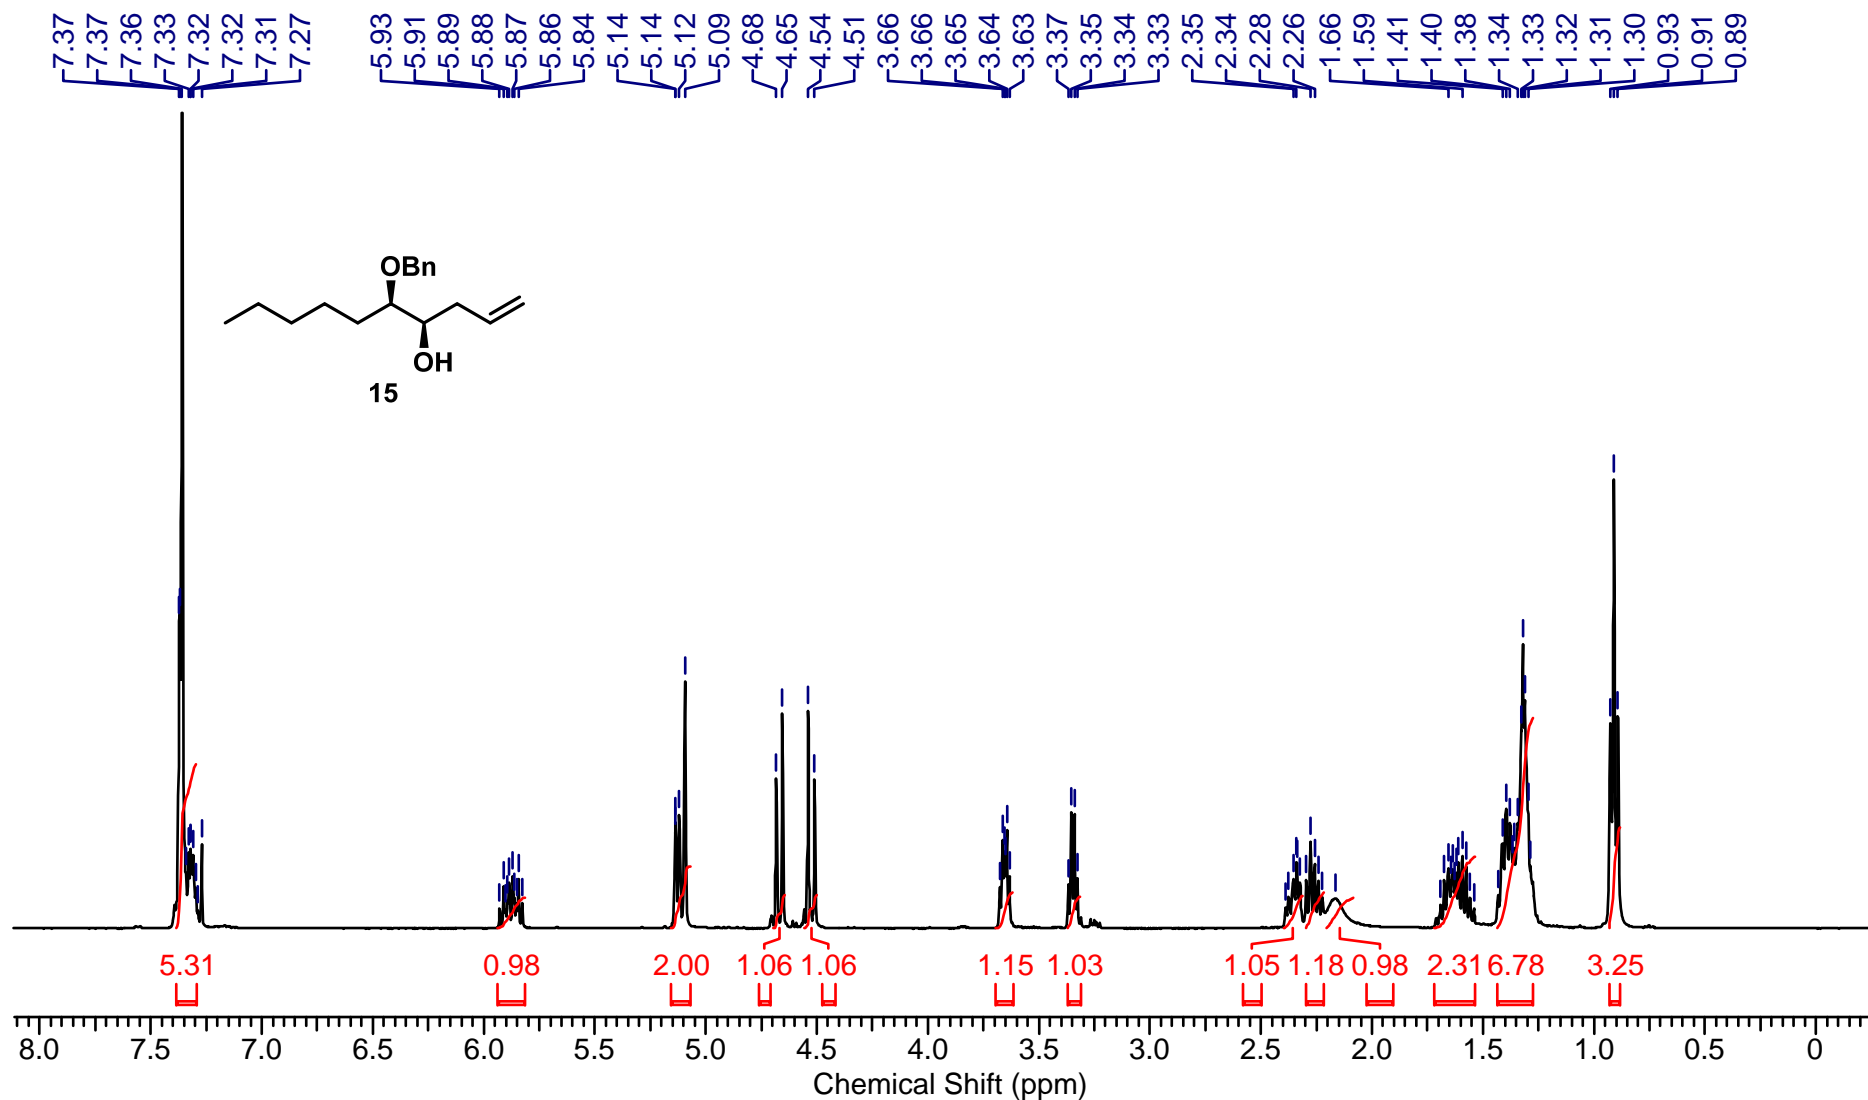

# $^{13}\text{C}$ NMR (100MHz, $\text{CDCl}_3$ ) of the compound (4*R*,5*R*)-5-(benzyloxy)dec-1-en-4-ol 15:

Sat1av400#005.003.001.1r.esp

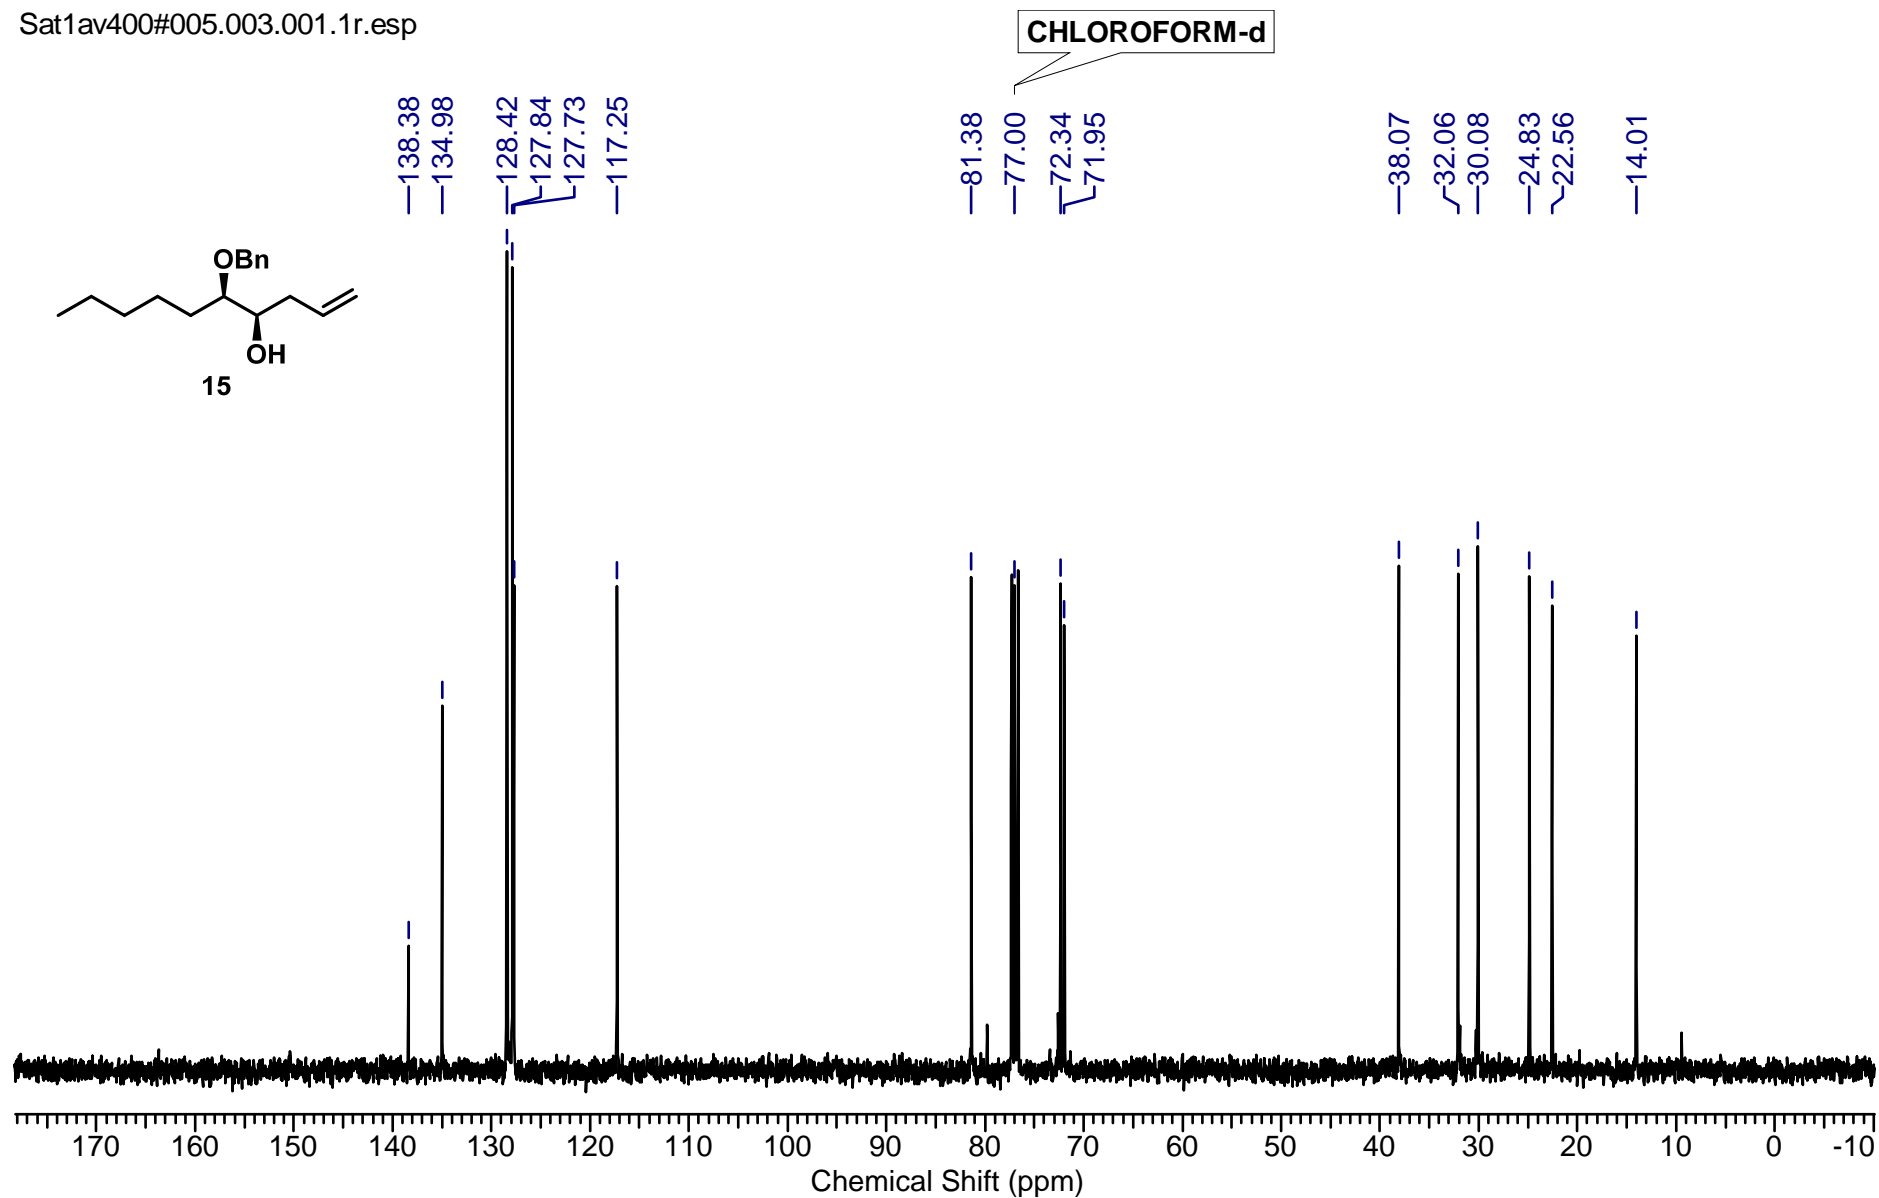

UNR-A-5 #142 RT: 0.63 AV: 1 NL: 3.71E7  
T: FTMS + p ESI Full ms [86.00-1290.00]

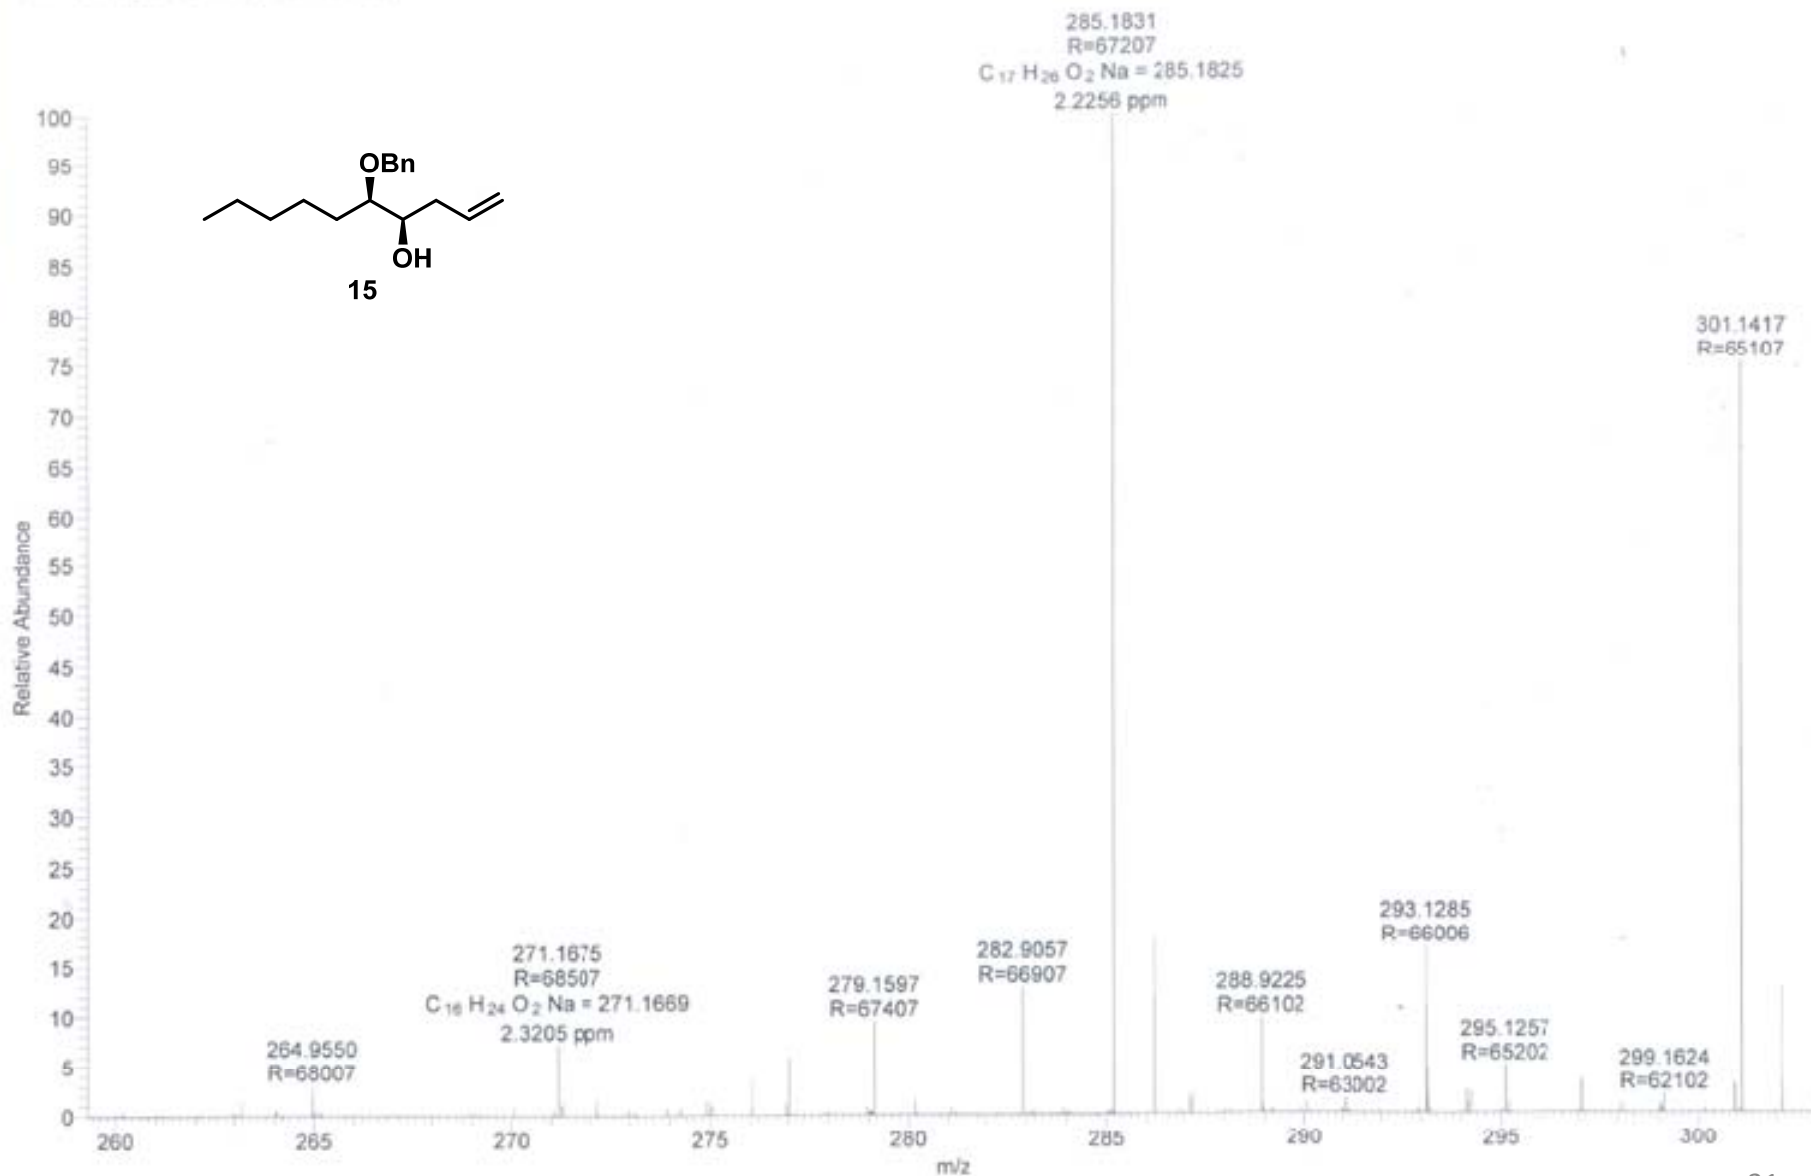

**<sup>1</sup>H NMR (400MHz, CDCl<sub>3</sub>) of the compound (4*S*,5*R*)-5-(benzyloxy)dec-1-en-4-yl 4-nitrobenzoate 16:**

Sat1av400#002.001.001.1r.epp

CHLOROFORM-d

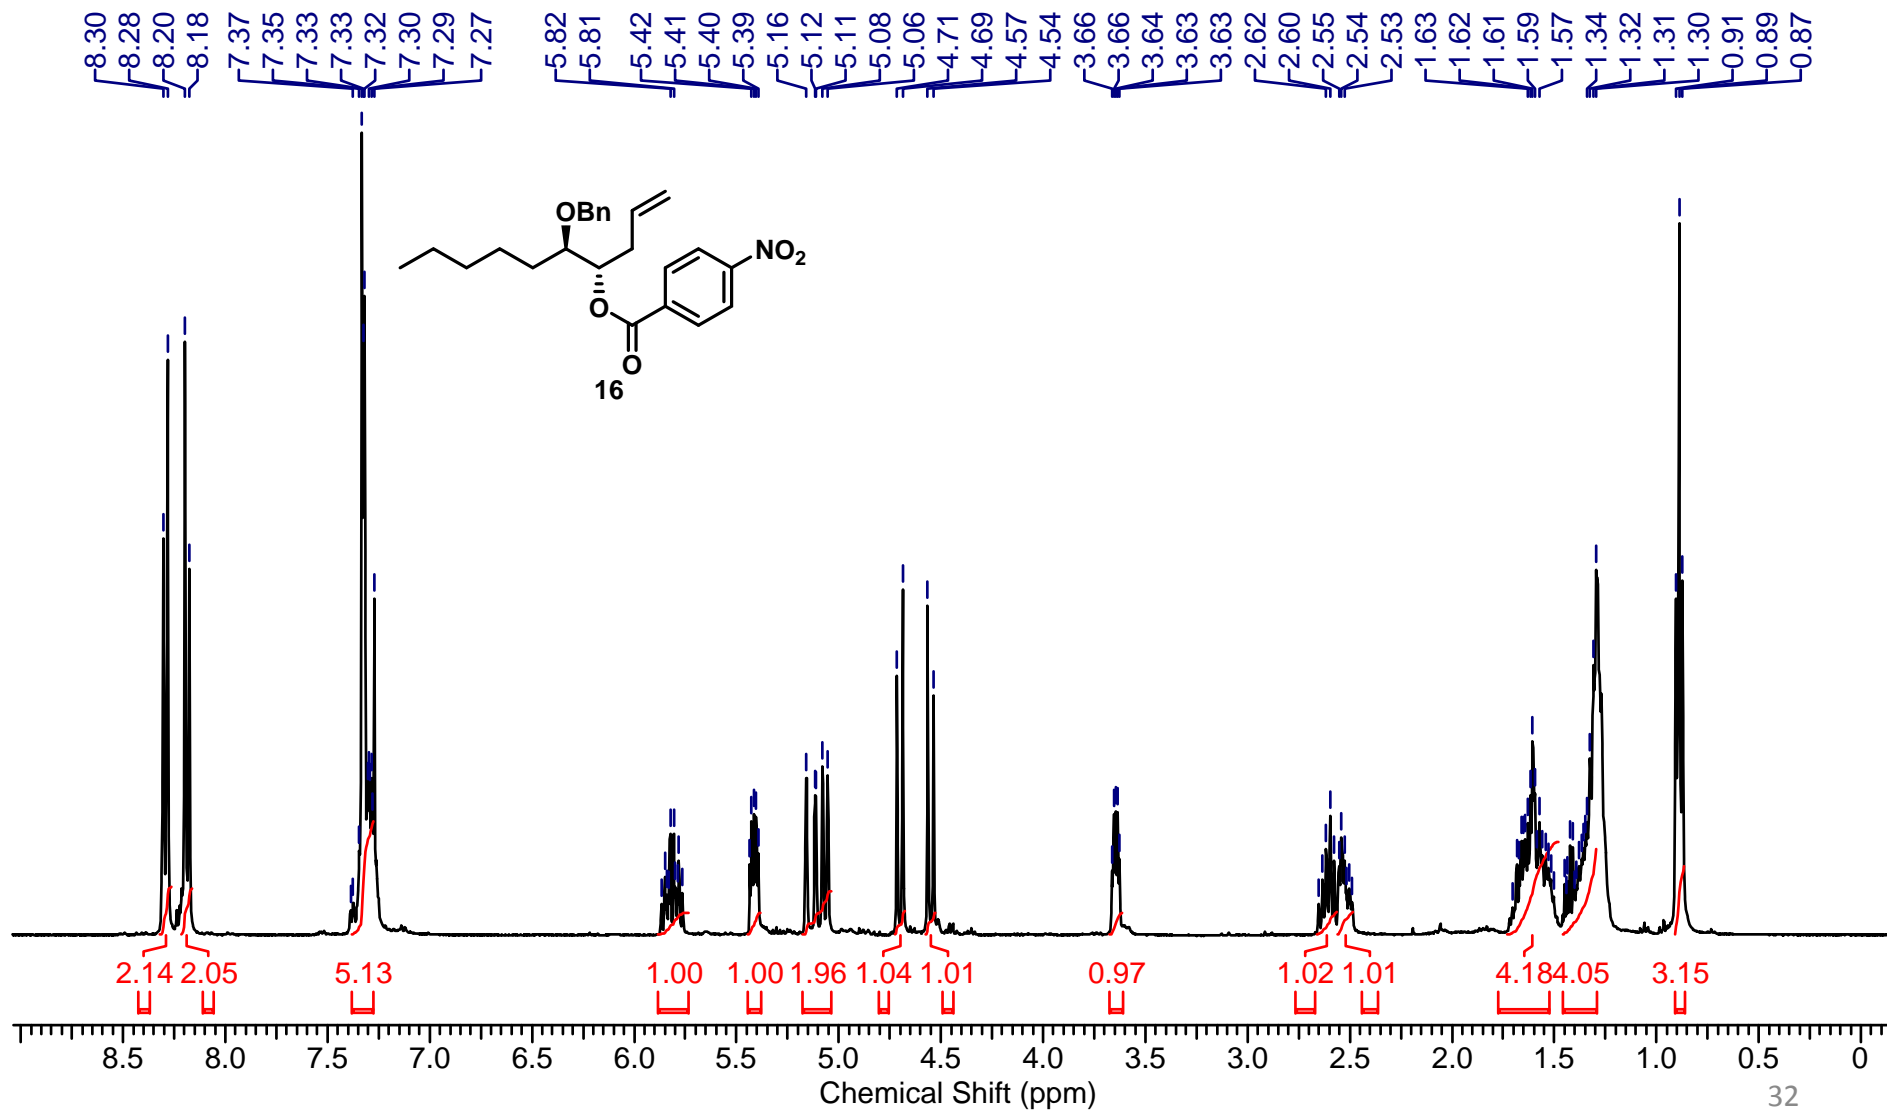



**$^{13}\text{C}$  NMR (100MHz,  $\text{CDCl}_3$ ) of the compound (4*S*,5*R*)-5-(benzyloxy)dec-1-en-4-yl 4-nitrobenzoate 16:**

Sat1av400#002.003.001.1r.esp

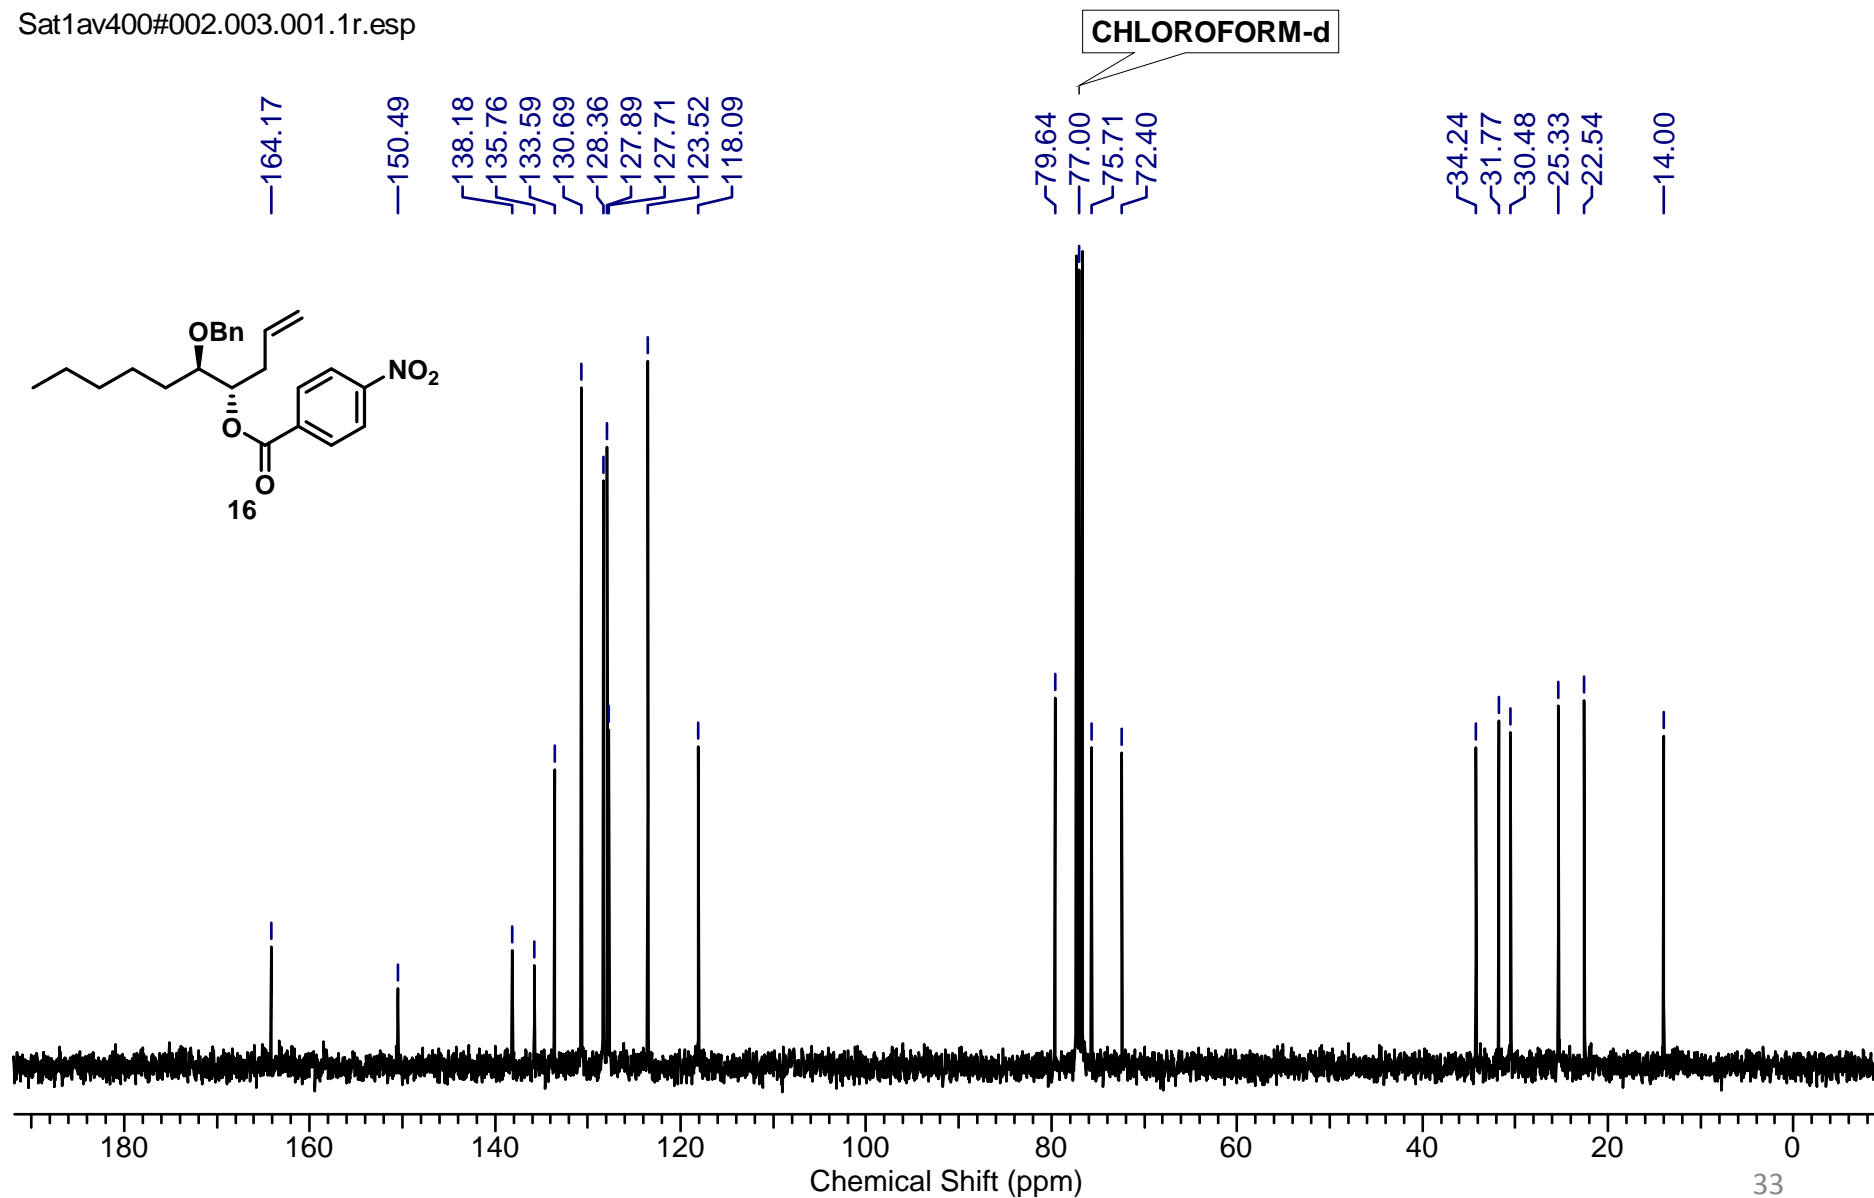

UNR-A-9 #231 RT: 1.03 AV: 1 NL: 4.46EB  
T: FTMS + p ESI Full ms [86 00-1200 00]

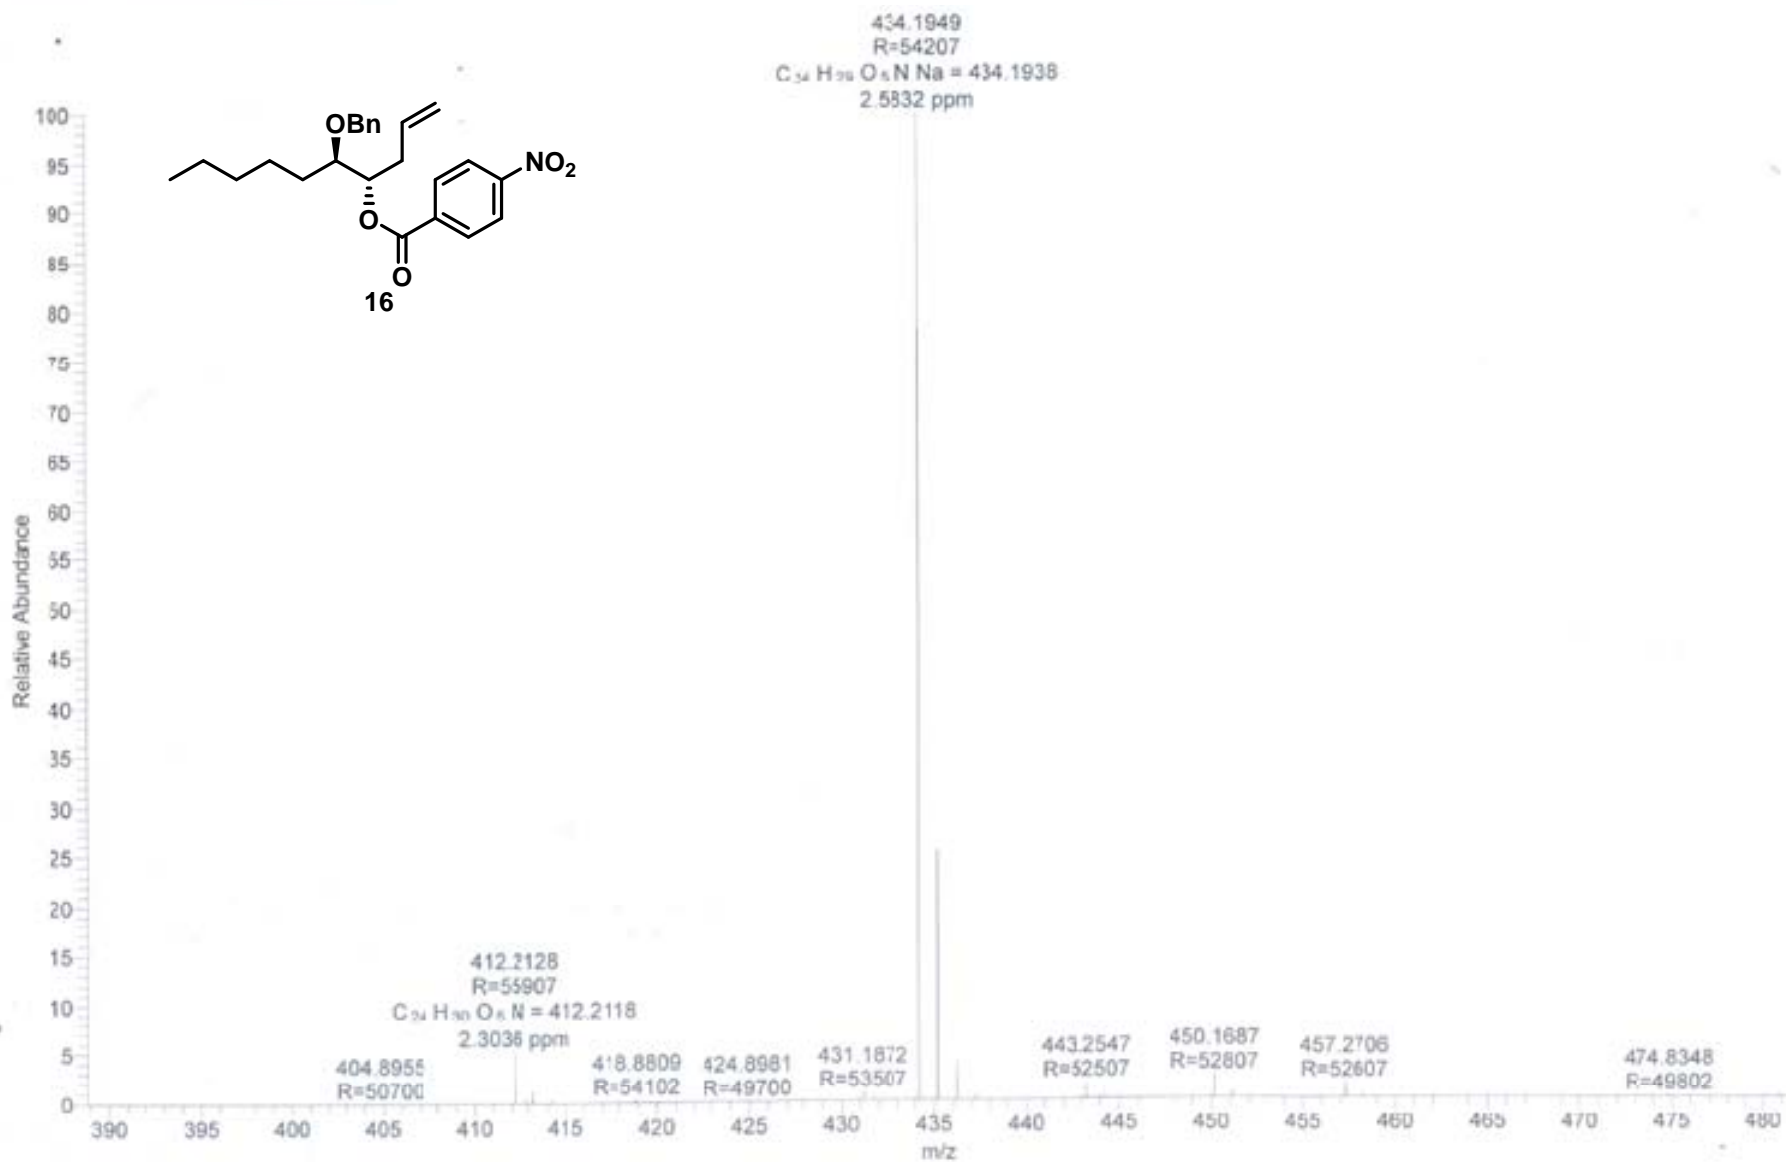

# $^1\text{H}$ NMR (200MHz, $\text{CDCl}_3$ ) of the compound hex-5-enoic acid 17:

Wed1av2#140.0010011 F01  
CHLOROFORM-d

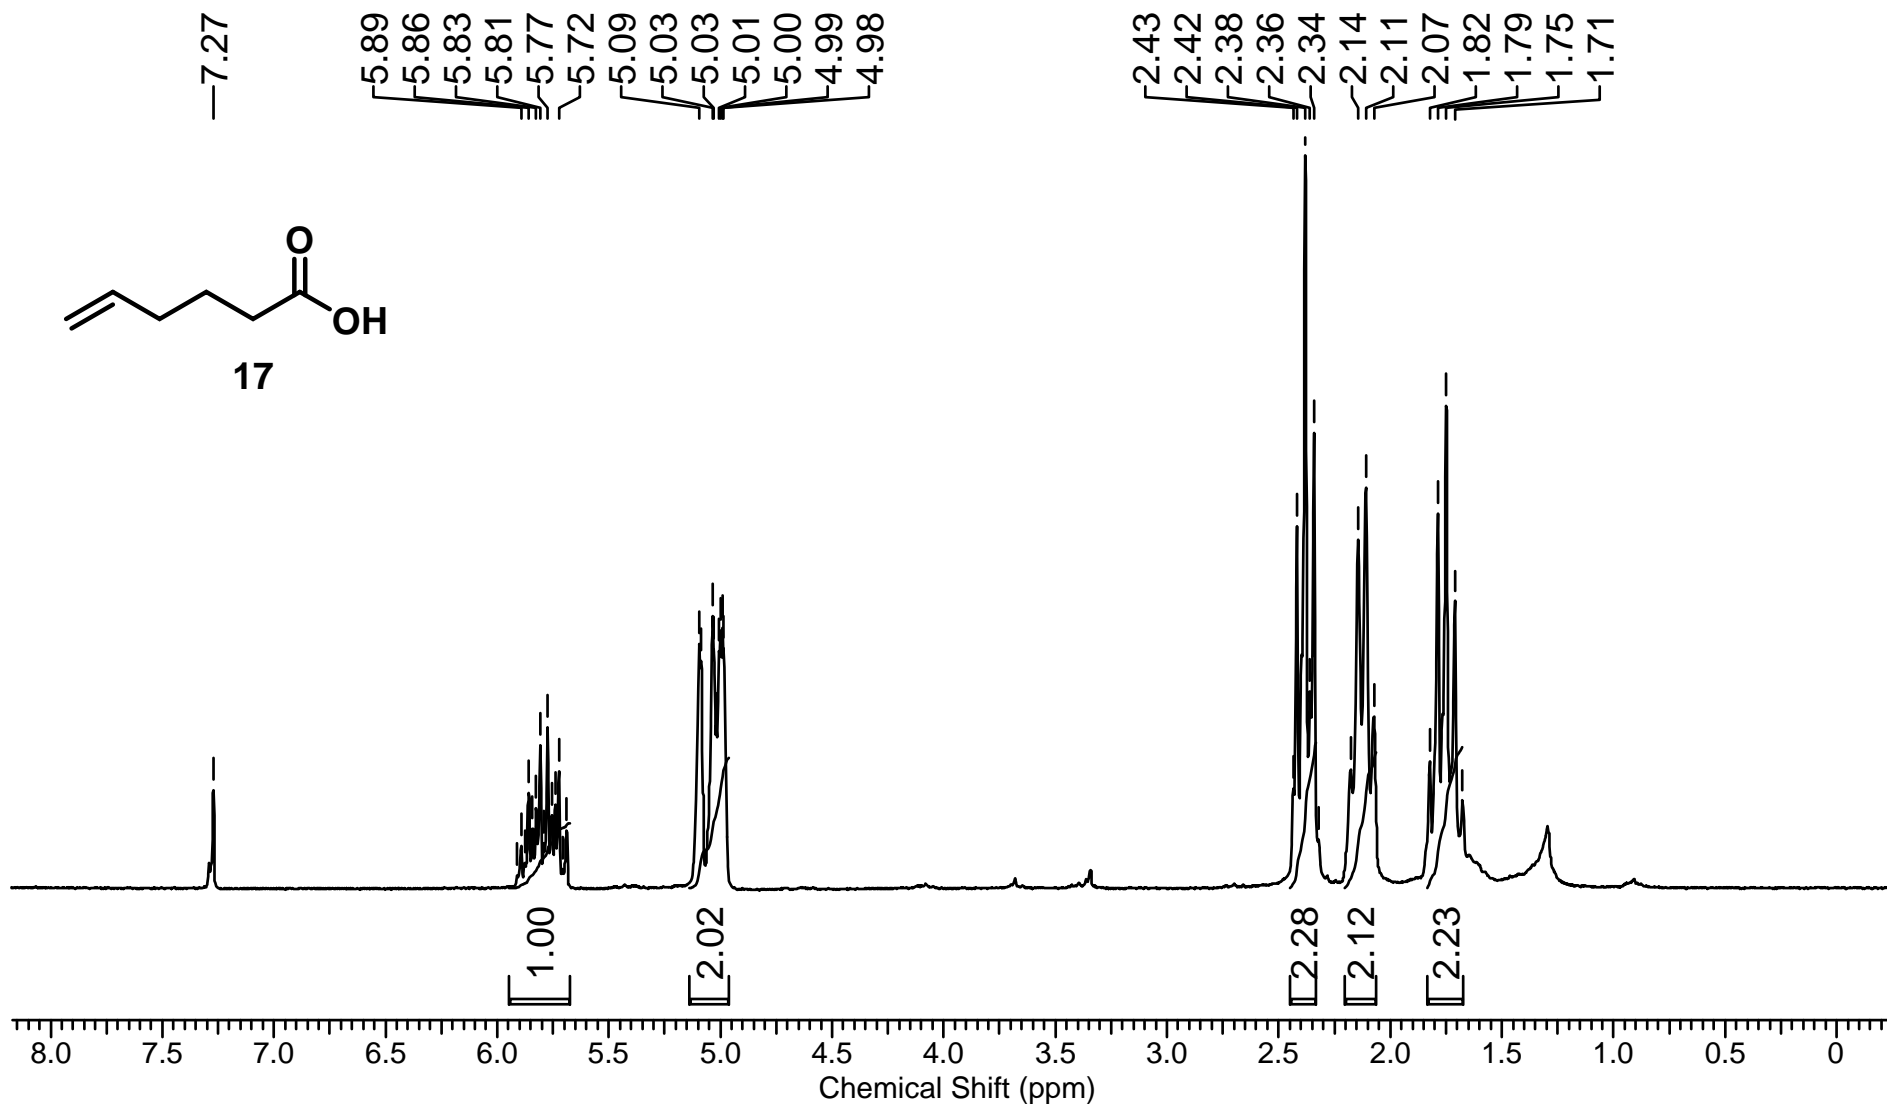

**$^1\text{H}$  NMR (200MHz,  $\text{CDCl}_3$ ) of the compound benzyl hex-5-enoate 18:**

Wed2av2#020.001.001.1089  
CHLOROFORM-d

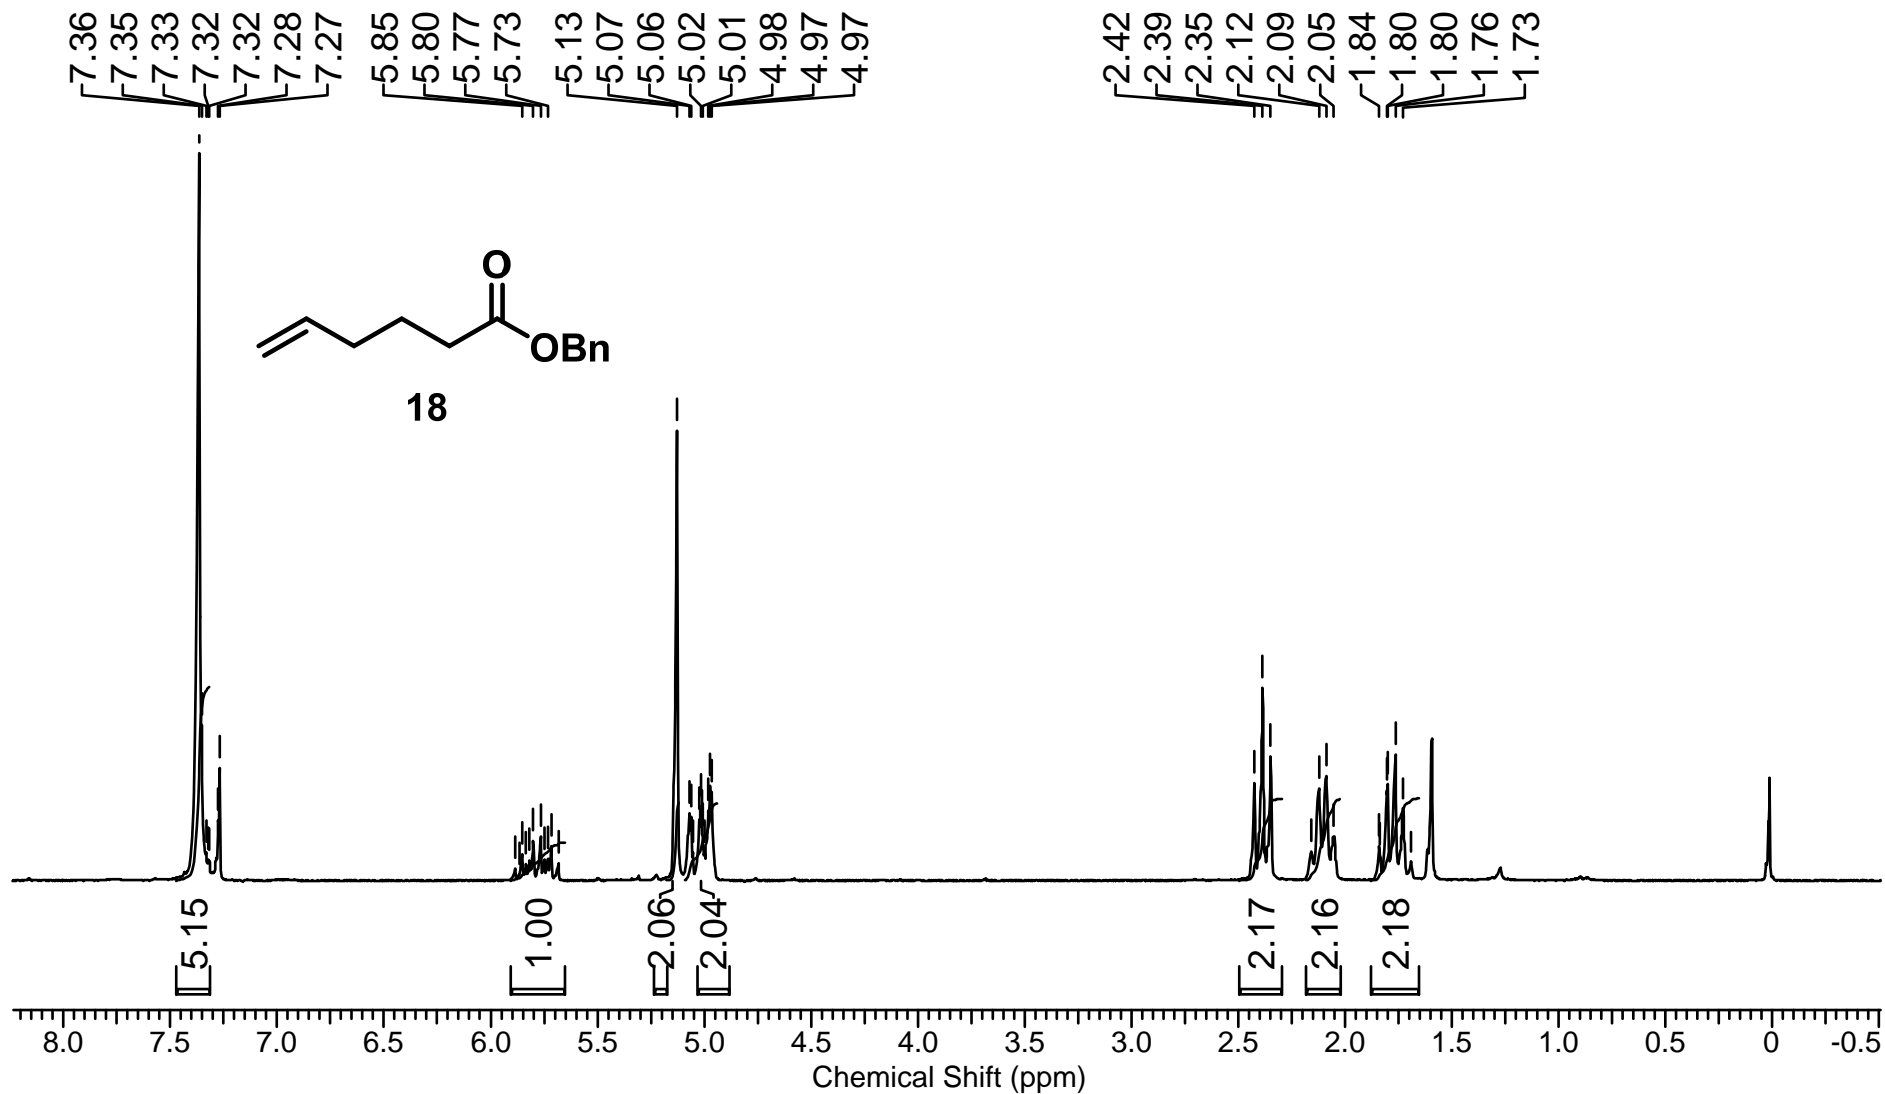

# $^1\text{H}$ NMR (50MHz, $\text{CDCl}_3$ ) of the compound benzyl hex-5-enoate 18:

Tue5av2#252.001.001.1r.esp

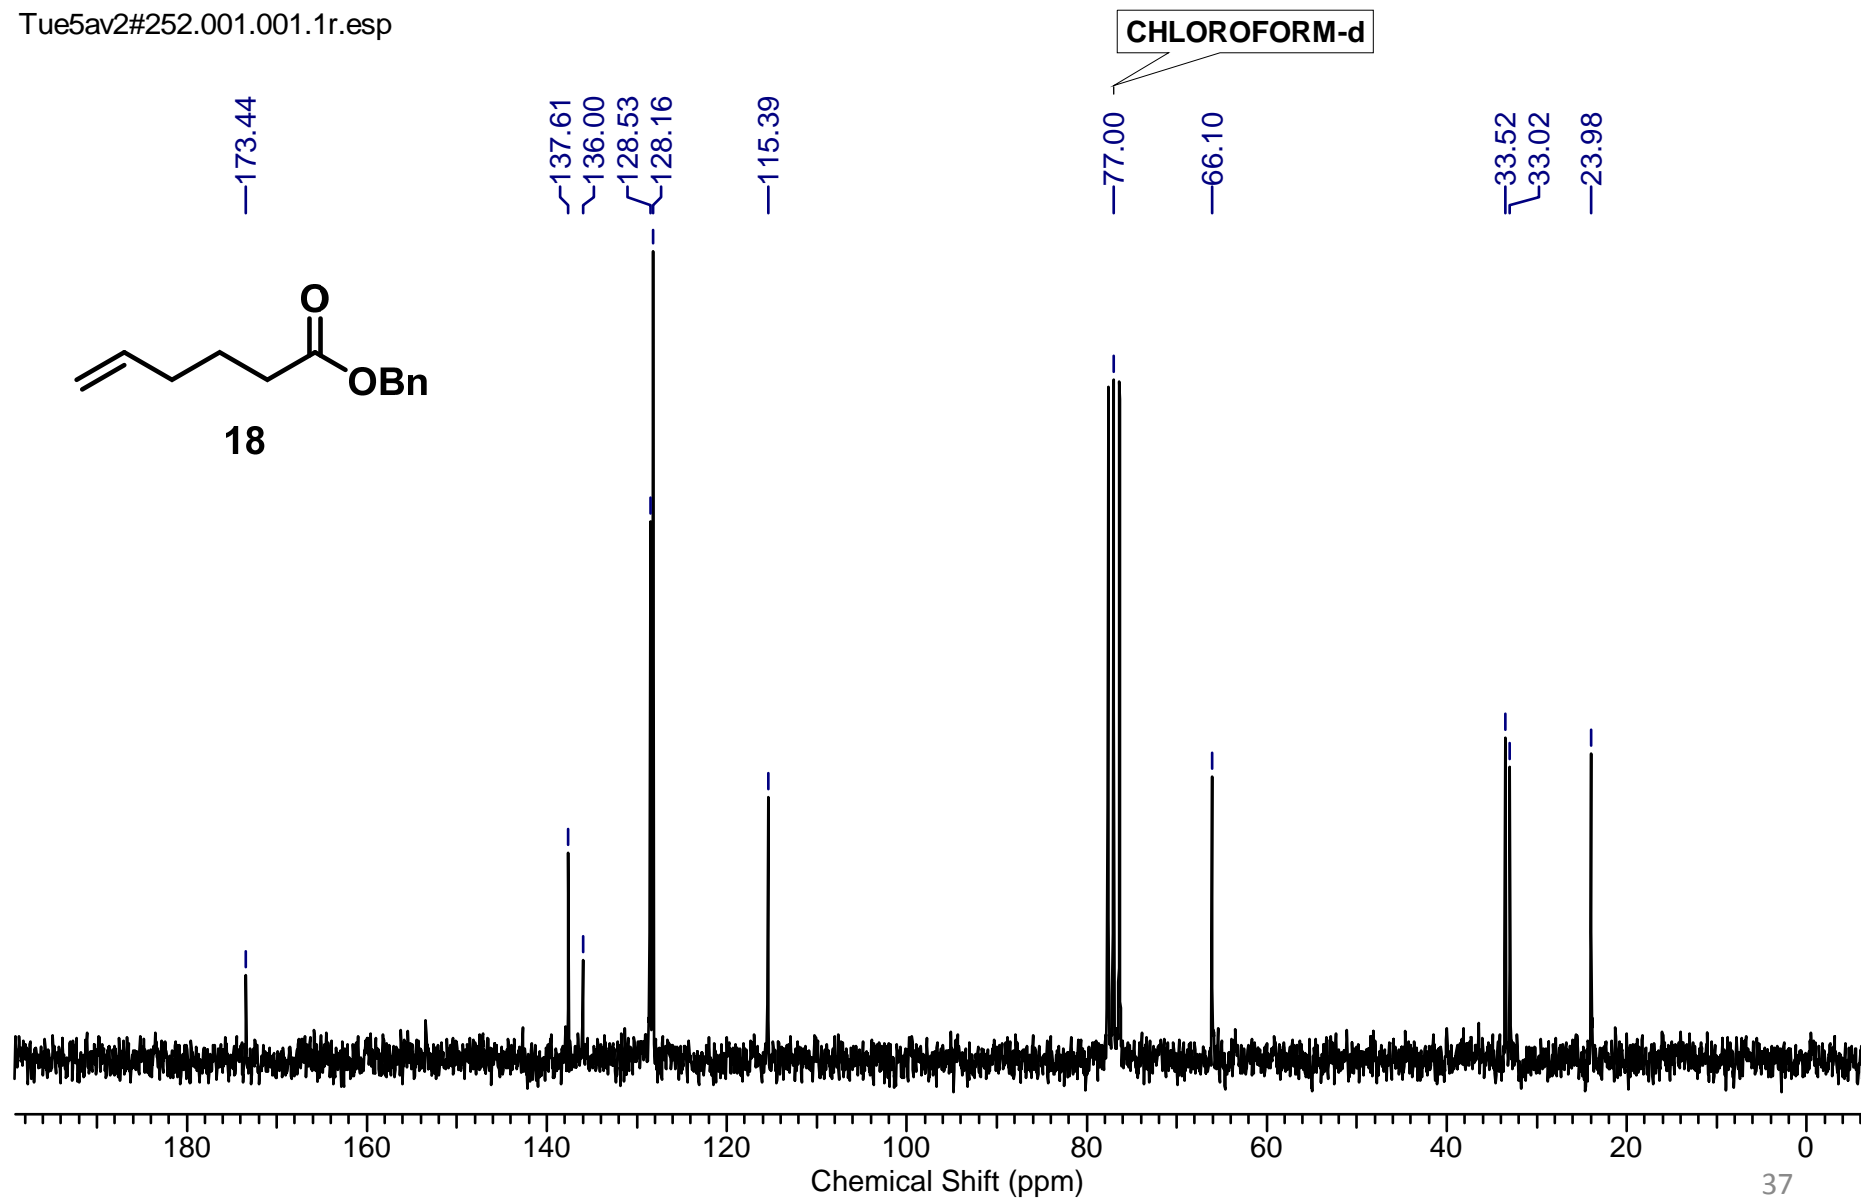

UNR-A-22 #130 RT: 0.58 AV: 1 NL: 9.23E7  
T: FTMS + p ESI Full ms [86.00-1290.00]

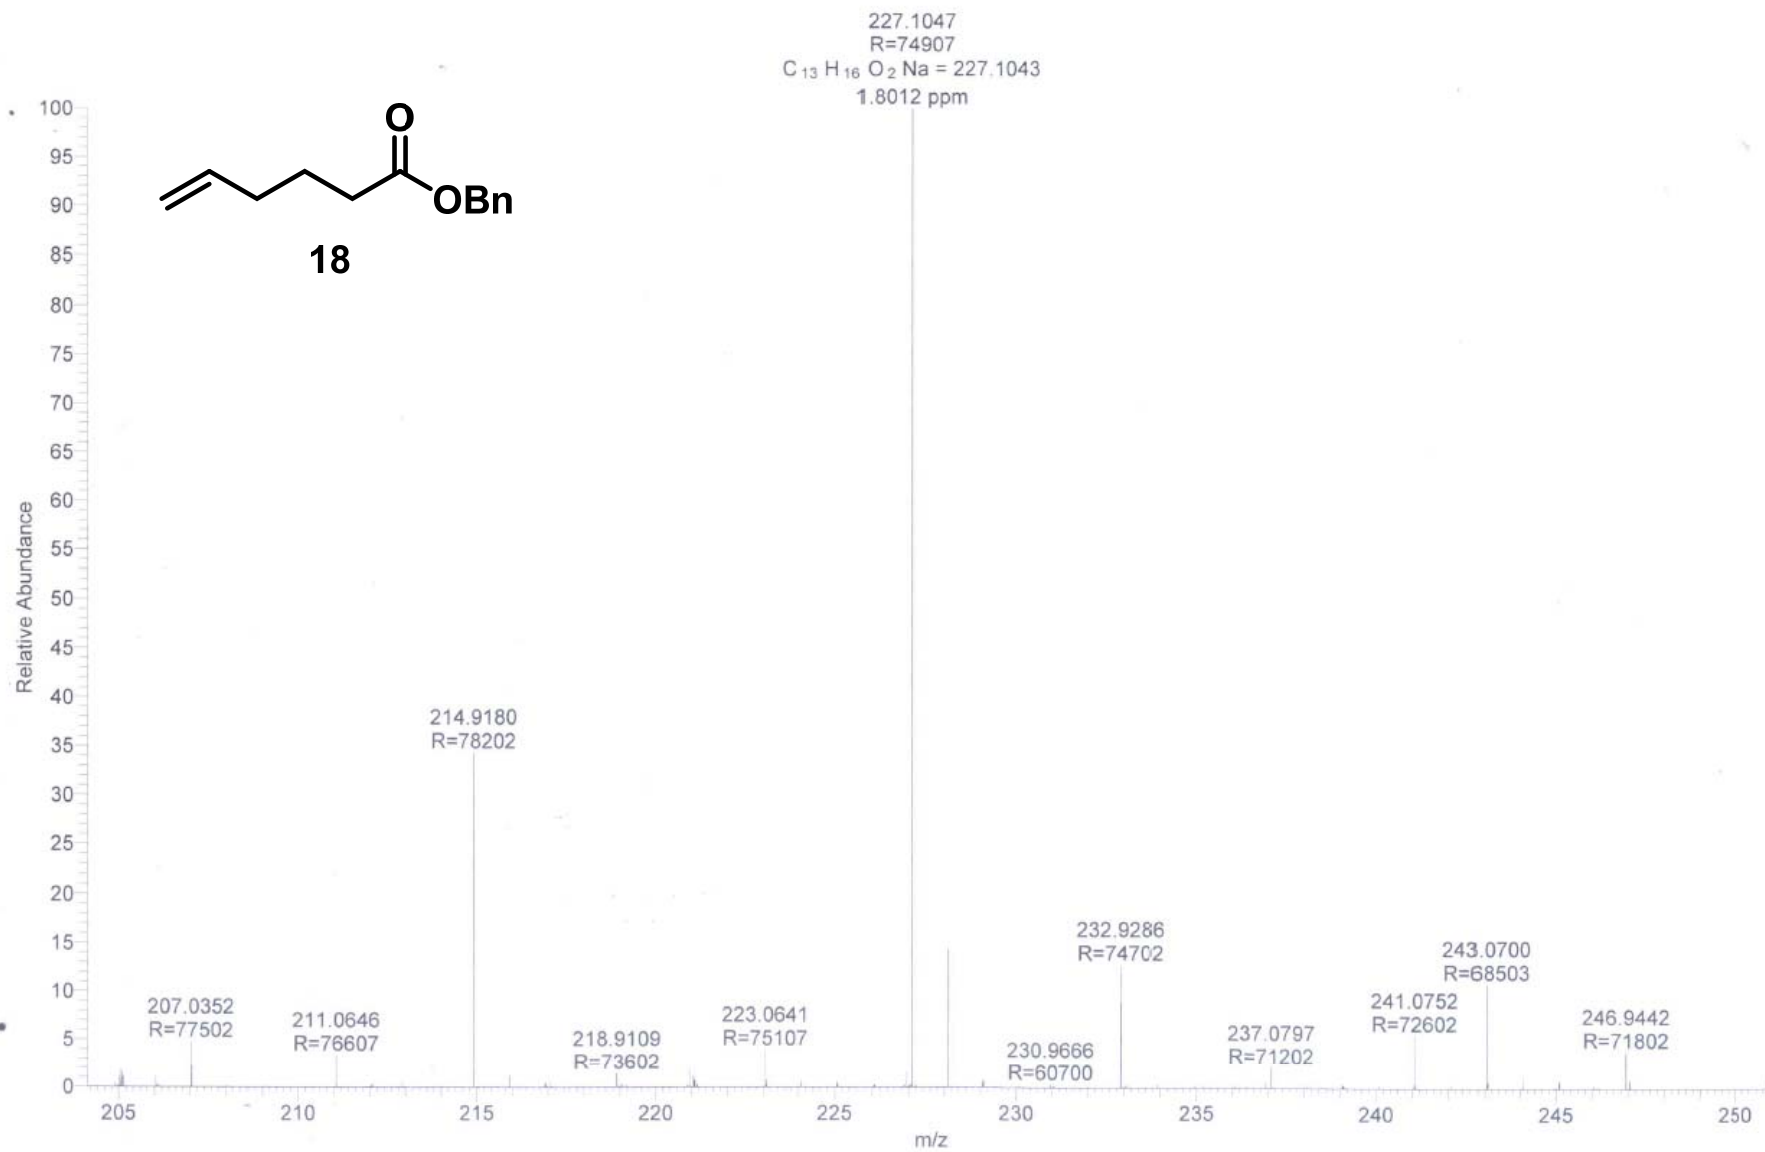

**$^1\text{H}$  NMR (400MHz,  $\text{CDCl}_3$ ) of the compound benzyl (8*S*,9*R*,*E*)-9-(benzyloxy)-8-hydroxytetradec-5-enoate 19:**

Sat1av400#004.001.001.1r.esp

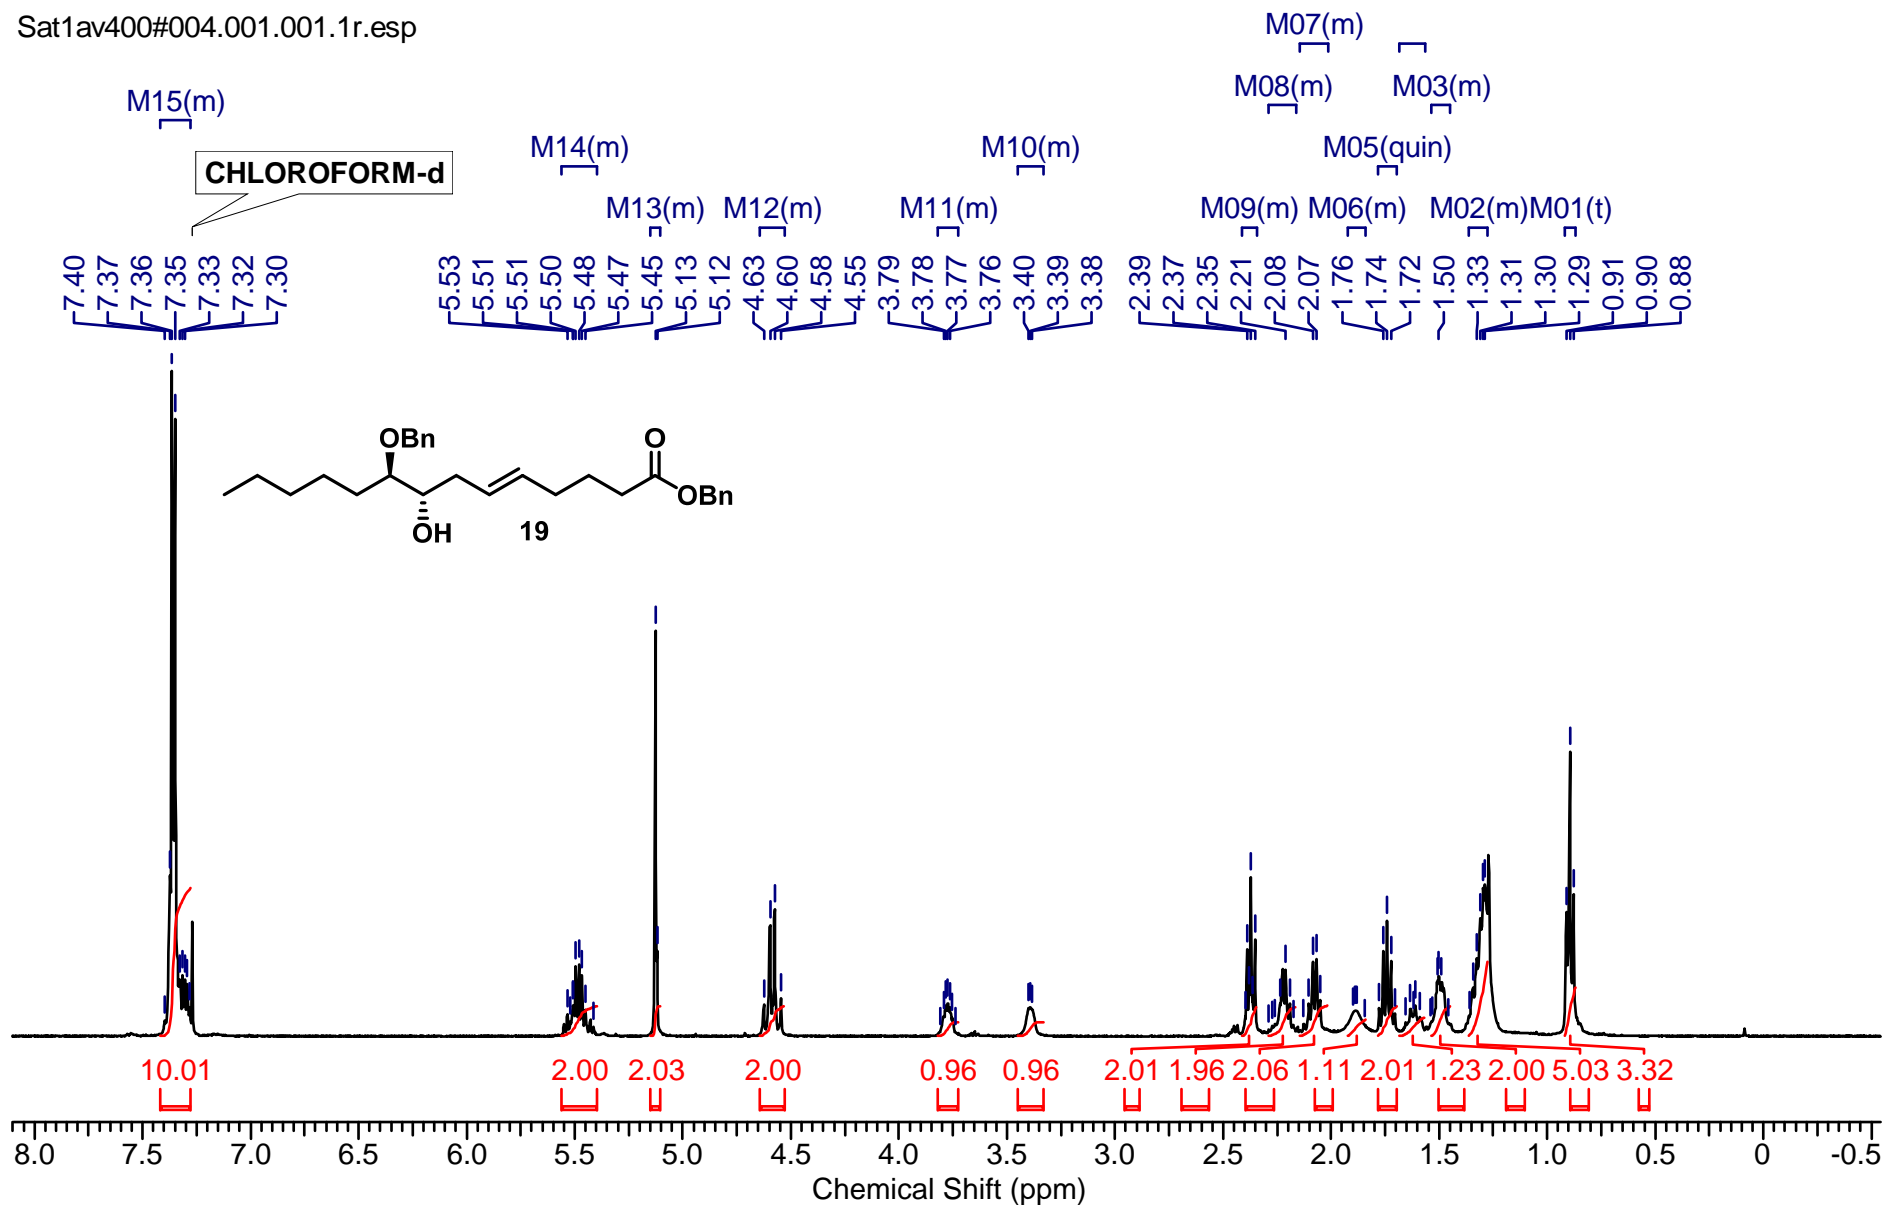

**$^{13}\text{C}$  NMR (100MHz,  $\text{CDCl}_3$ ) of the compound benzyl (8*S*,9*R*,*E*)-9-(benzyloxy)-8-hydroxytetradec-5-enoate 19:**

Sat1av400#004.003.001.1r.esp

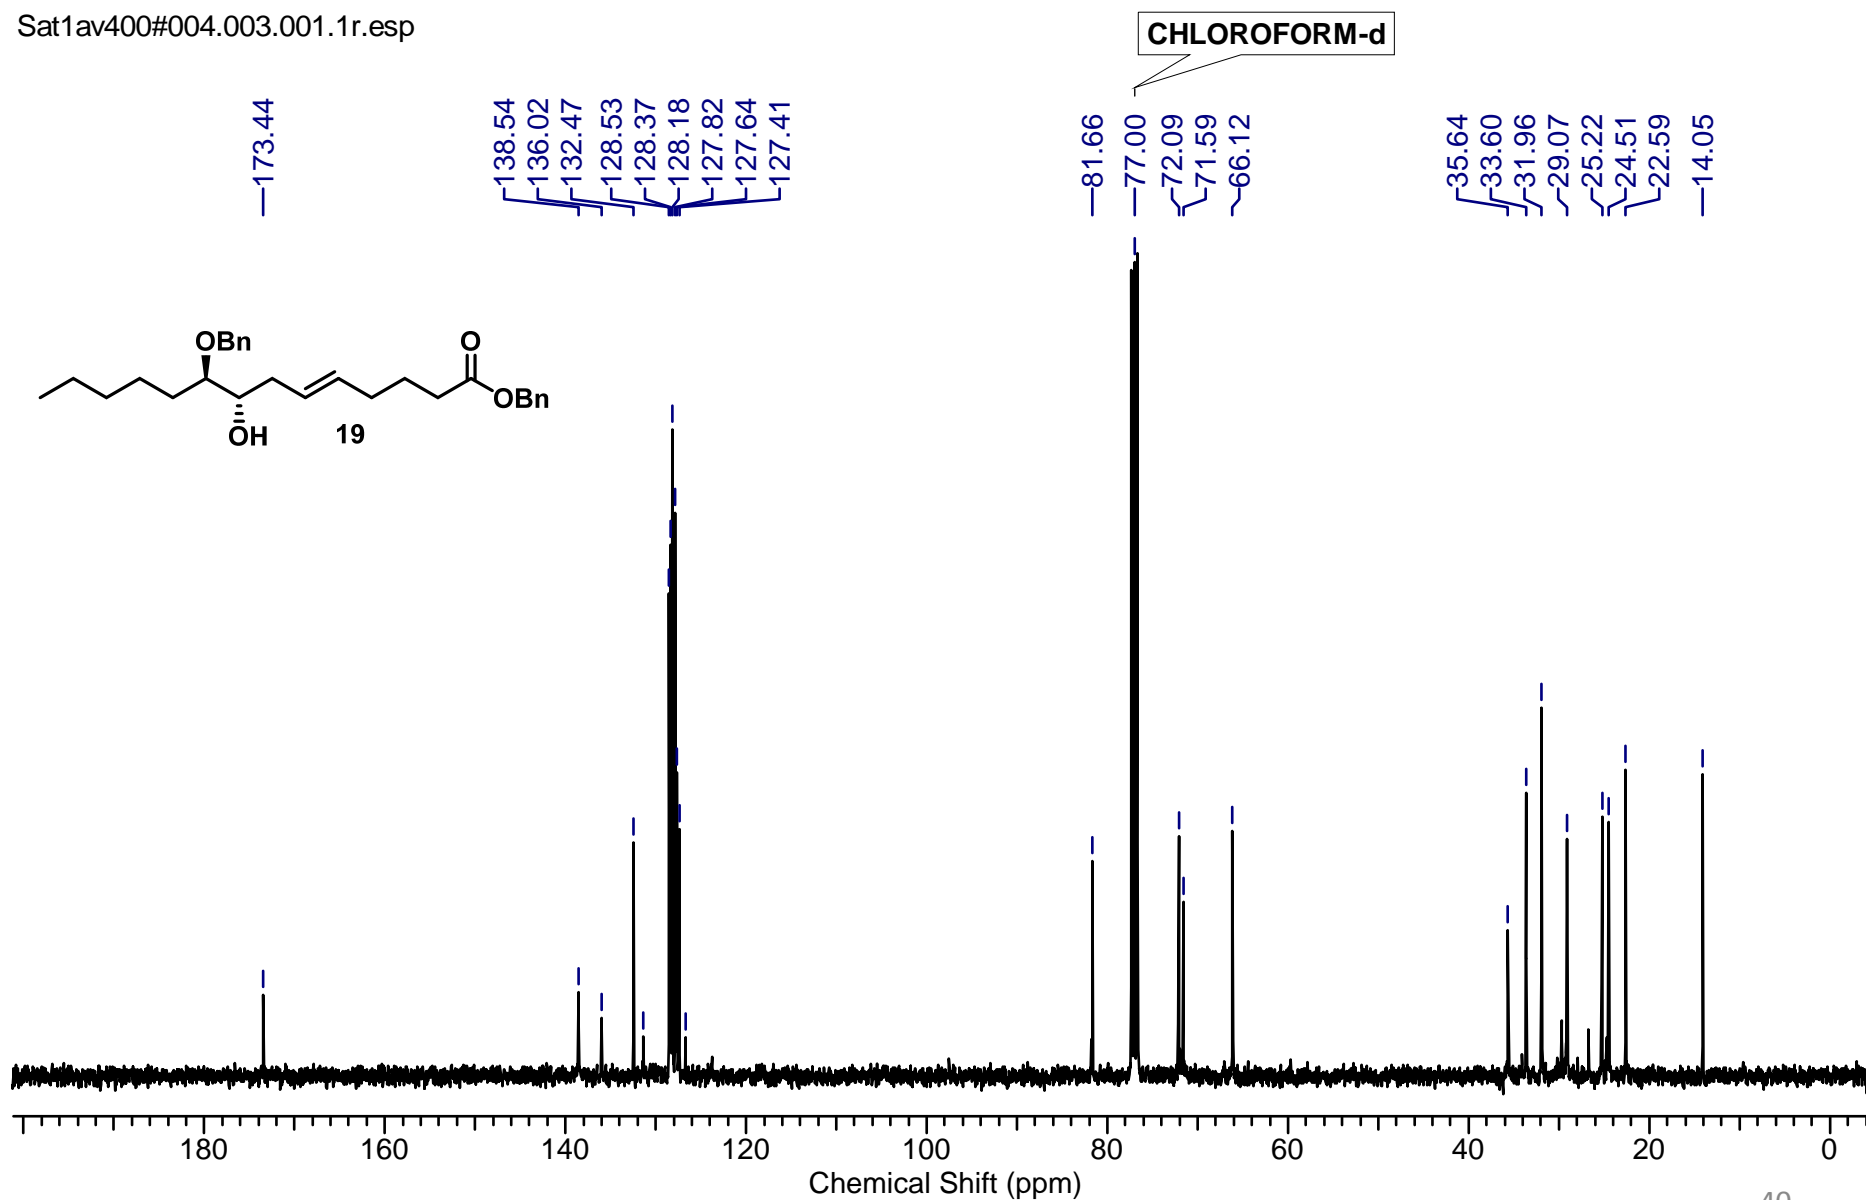



UNR-A-7 #197 RT: 0.88 AV: 1 NL: 8.77E8  
T: FTMS + p ESI Full ms [86.00-1290.00]

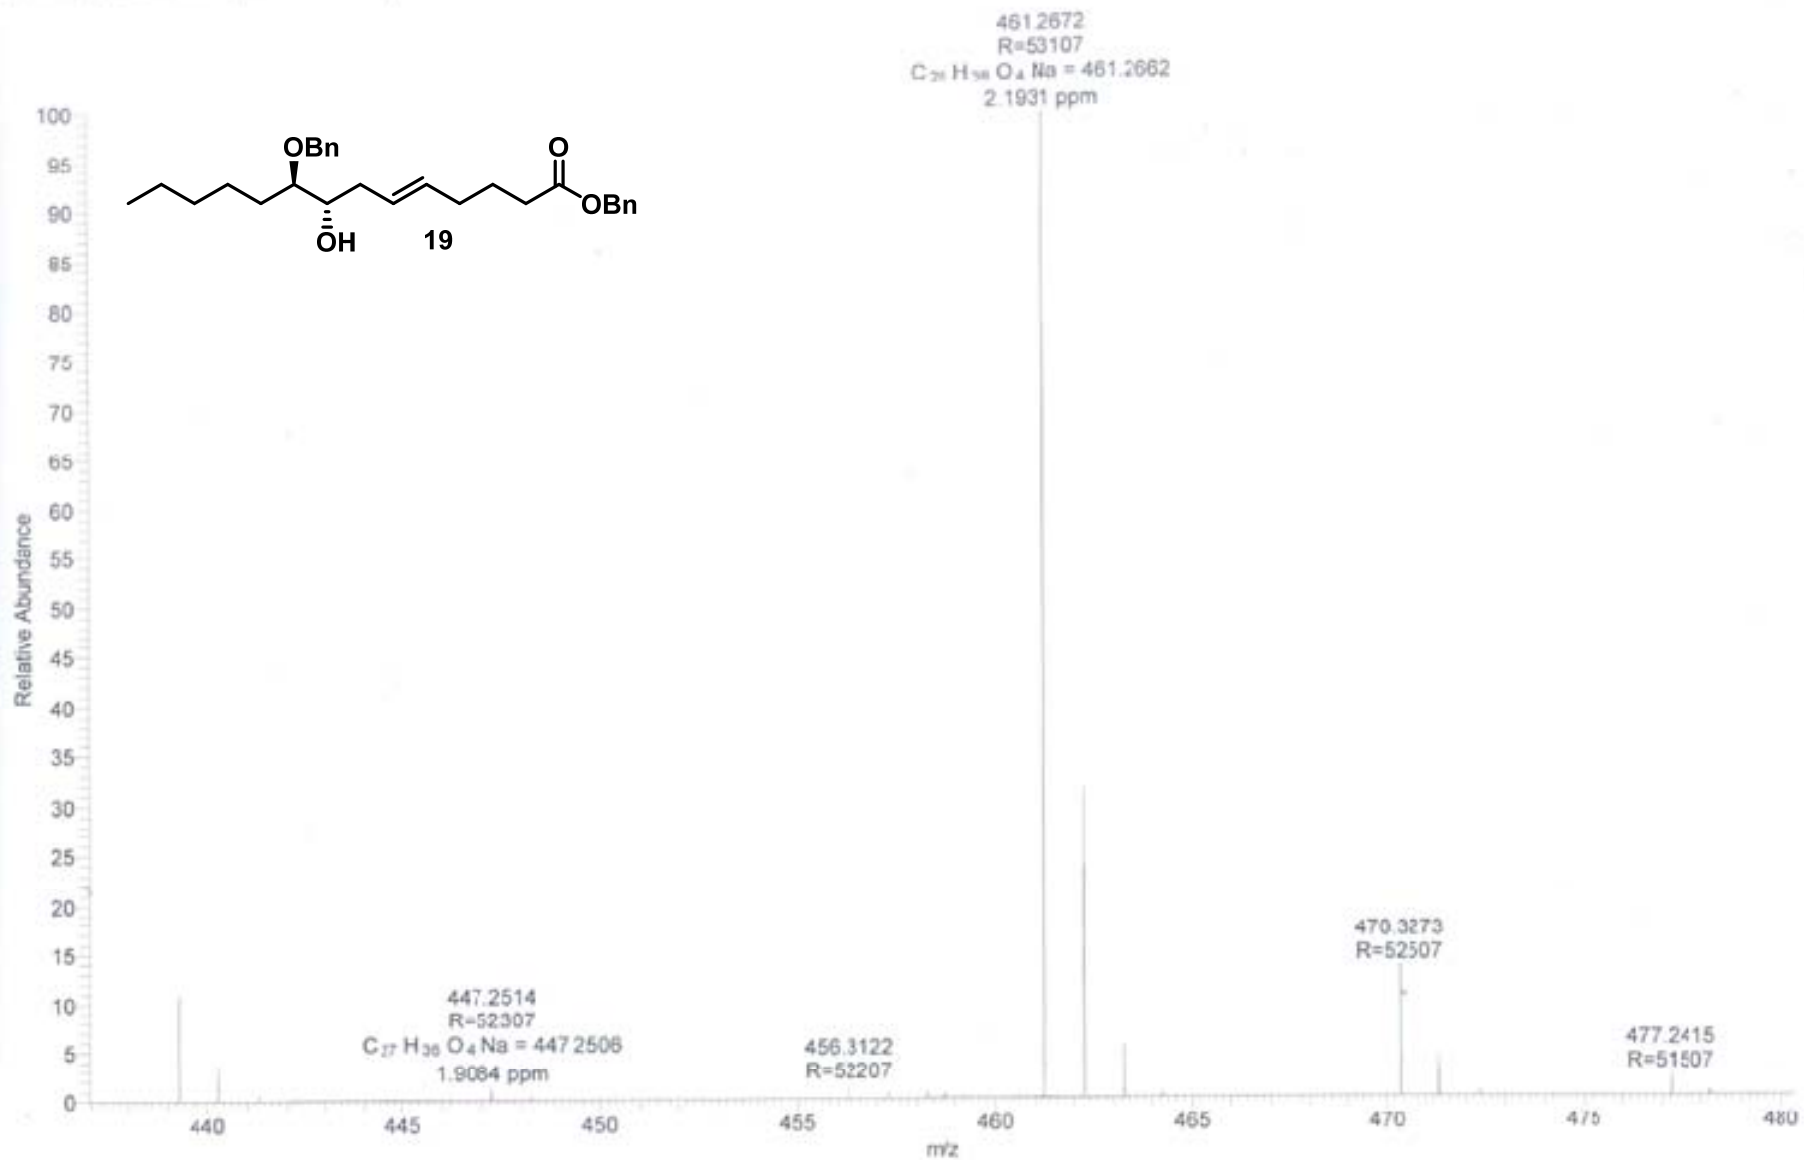

# $^1\text{H}$ NMR (400MHz, $\text{CDCl}_3$ ) of the compound benzyl 4-((2S,3S,5R)-5-((R)-1-(benzyloxy)hexyl)-3-hydroxytetrahydrofuran-2-yl)butanoate 20:

Thu2av400#019.001.001.1r.esp

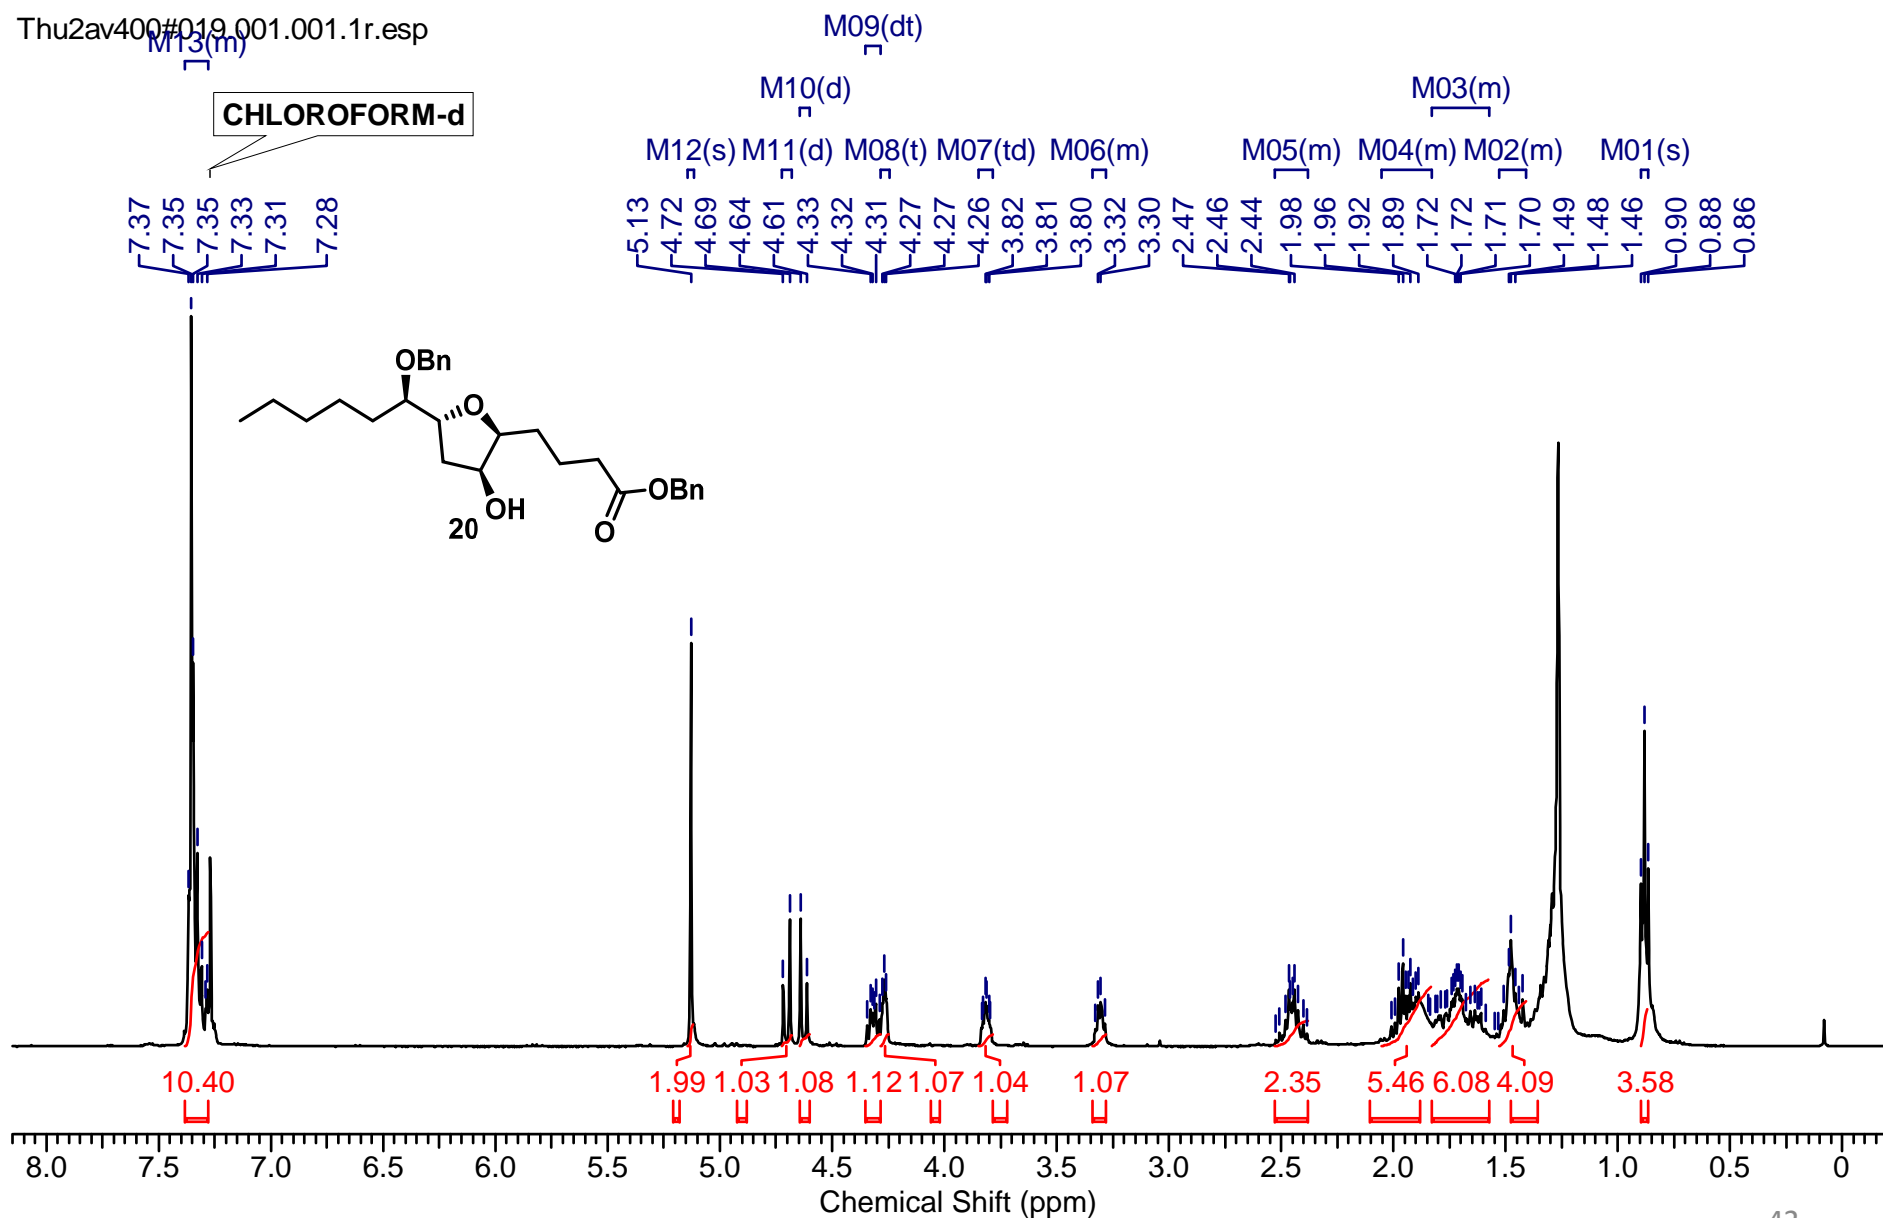

**$^{13}\text{C}$ NMR (100MHz,  $\text{CDCl}_3$ ) of the compound benzyl 4-((2*S*,3*S*,5*R*)-5-((*R*)-1-(benzyloxy)hexyl)-3-hydroxytetrahydrofuran-2-yl) butanoate 20:**

Thu2av400#019.003.001.1r.esp

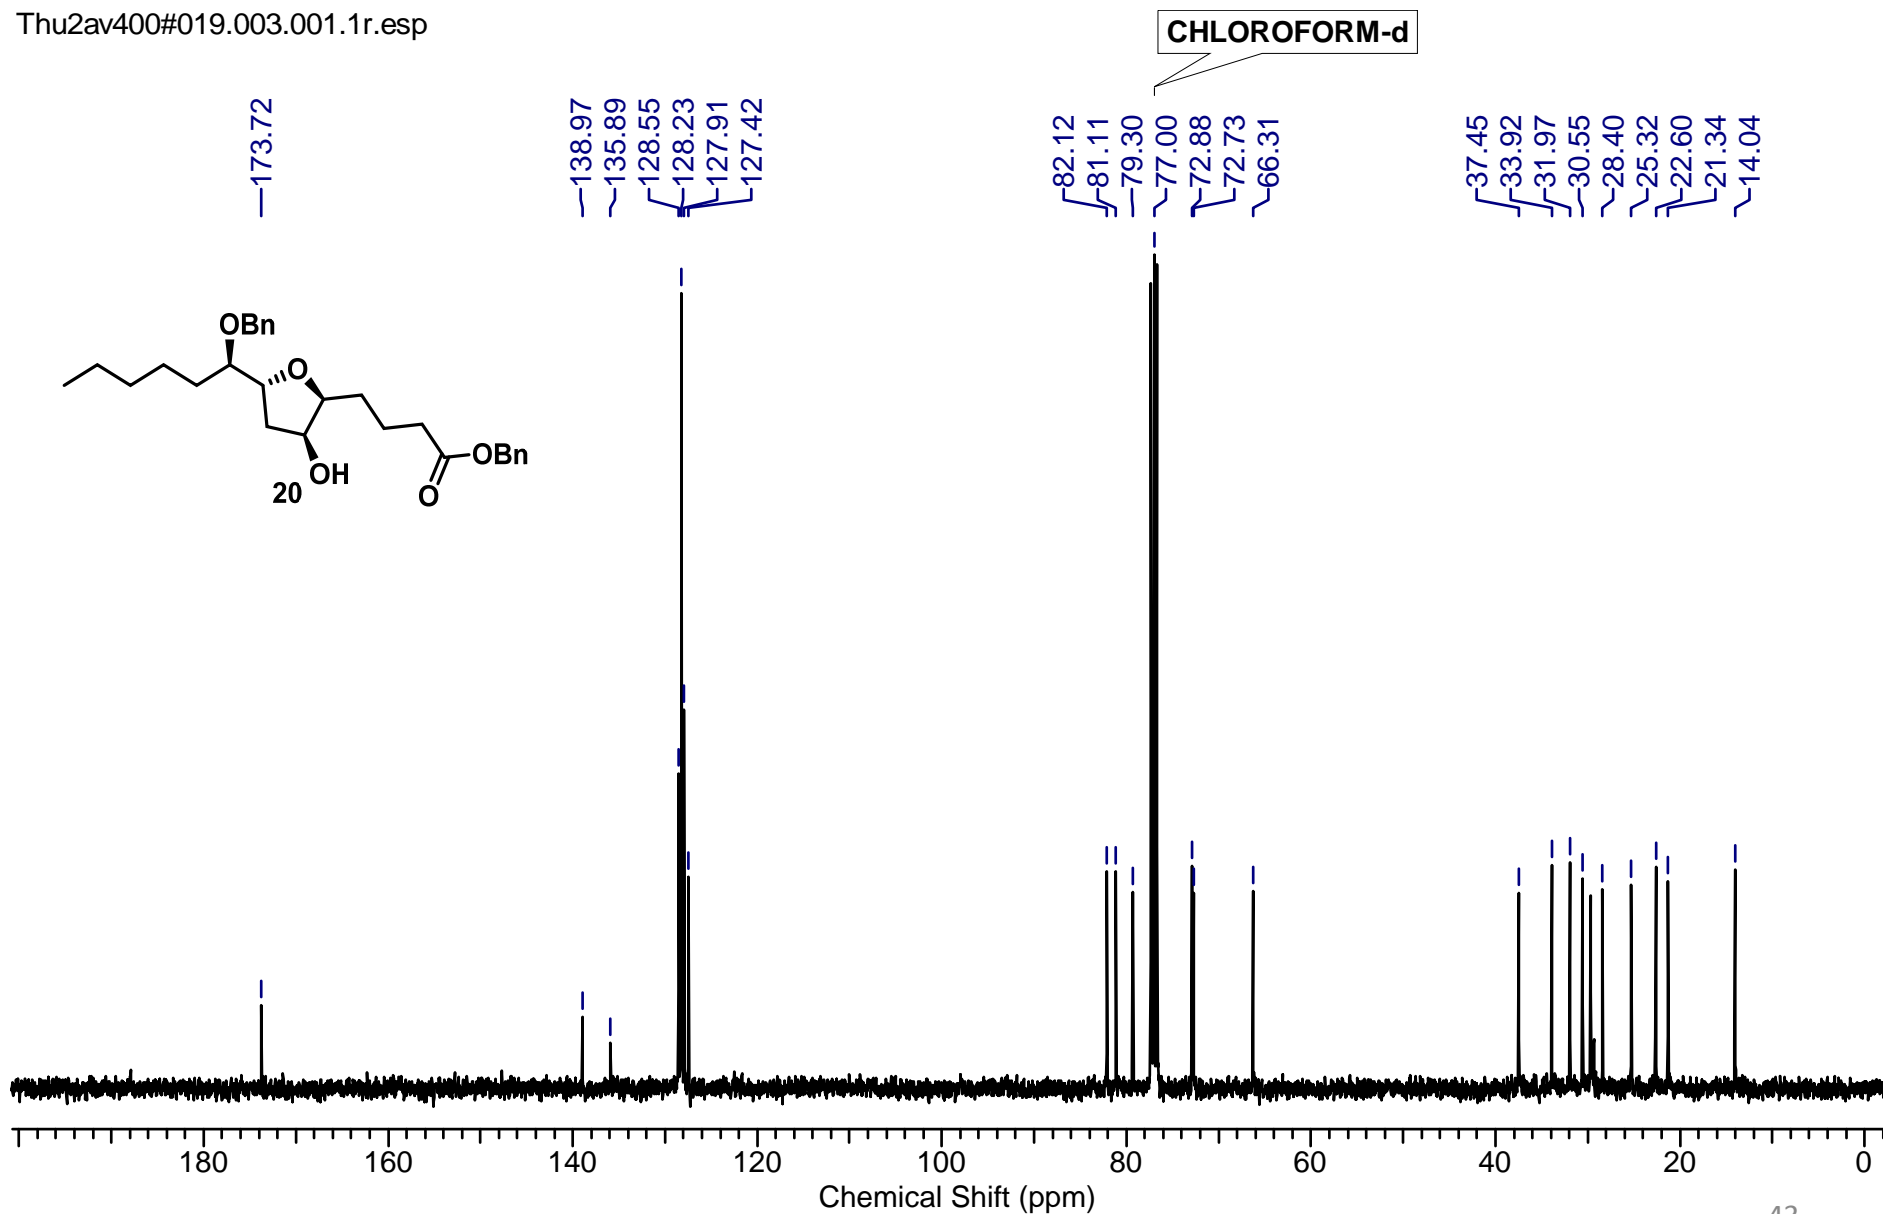

UNR-A-8 #162 RT: 0.72 AV: 1 NL: 3.21E8  
T: FTMS + p ESI Full ms [86.00-1290.00]

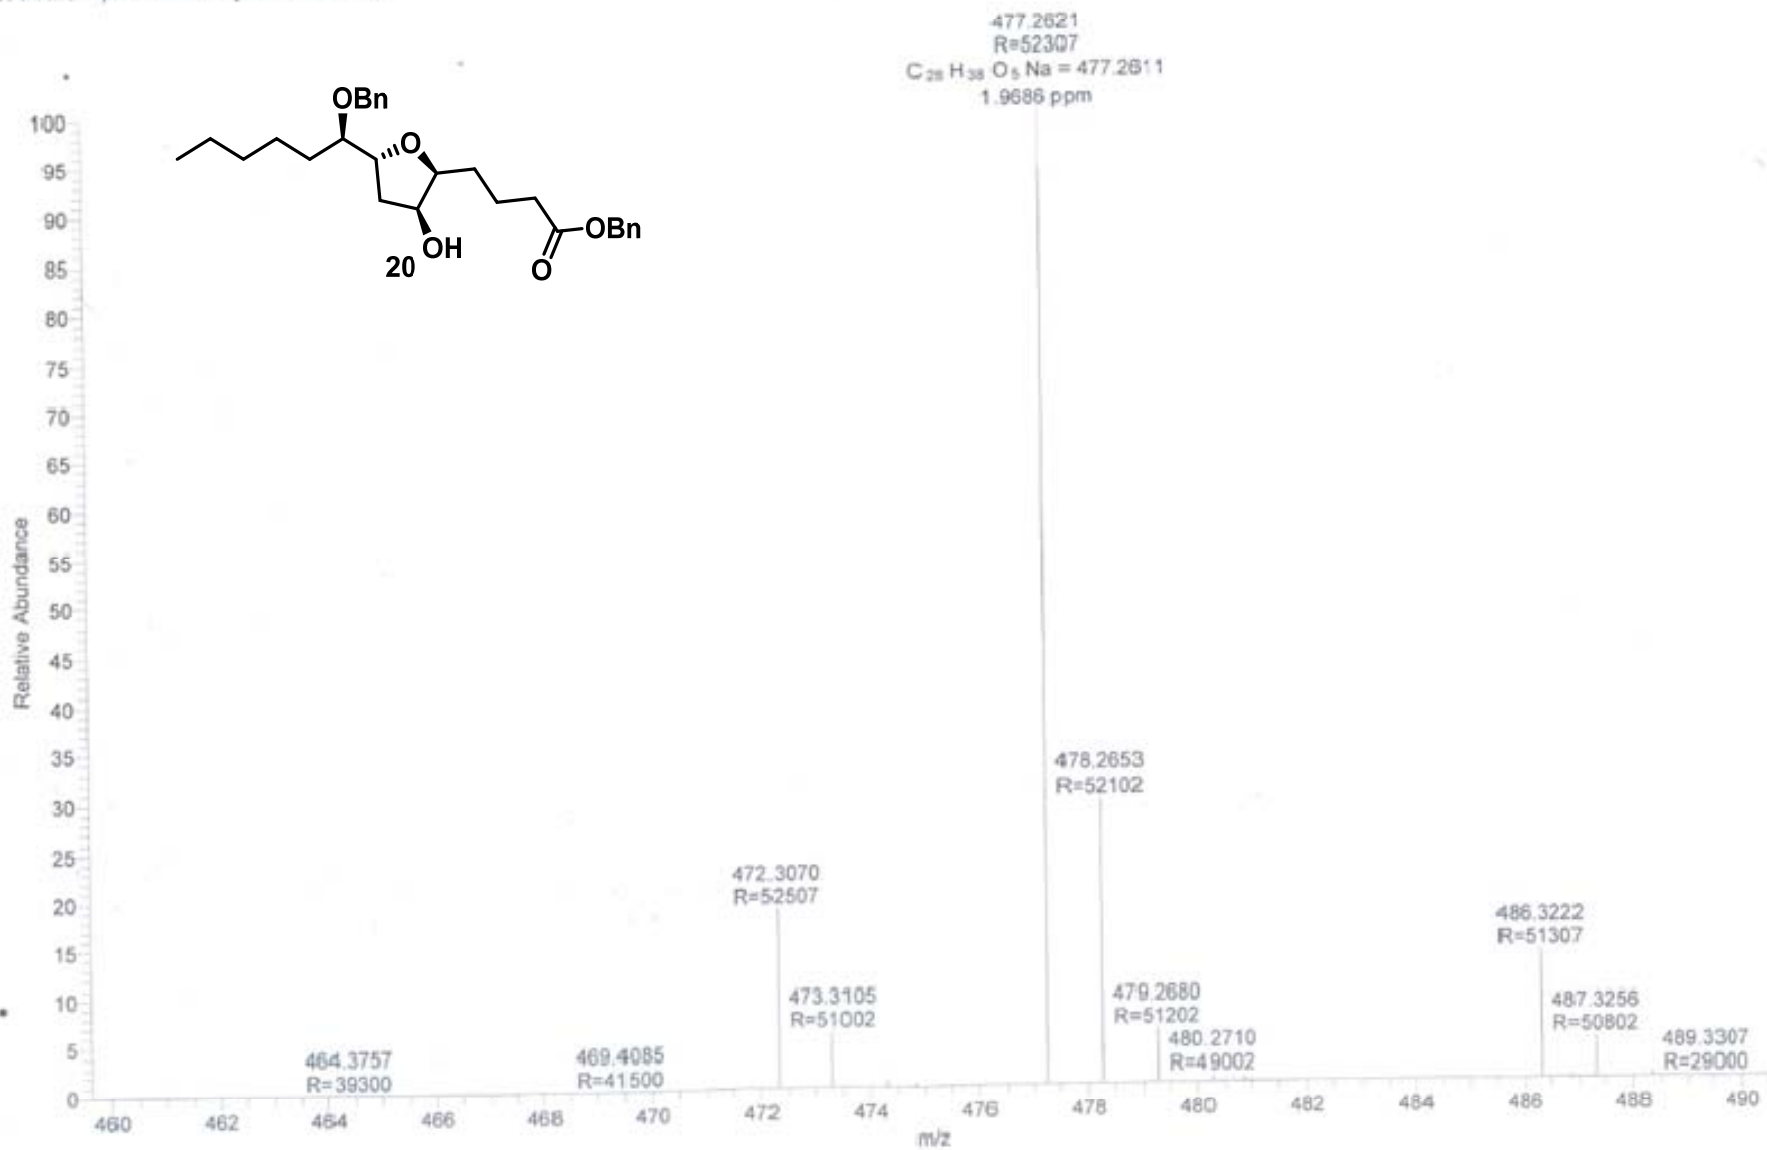

# $^1\text{H}$ NMR (500MHz, $\text{CDCl}_3$ ) of the compound (+)-Petromyroxol 1:

Tue3av500#015\_001\_001\_1r.esp

CHLOROFORM-d

-7.27

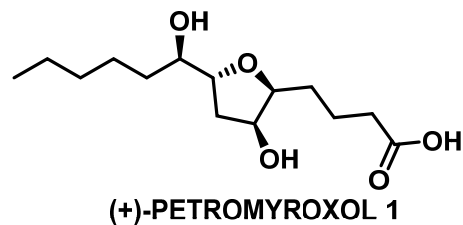

4.30  
4.29  
4.09  
4.08  
4.08  
4.06  
4.05  
3.81  
3.80  
3.80  
3.79  
3.41  
3.40  
3.38  
2.43  
2.42  
2.04  
1.74  
1.72  
1.71  
1.40  
1.39  
1.38  
1.33  
1.31  
1.31  
1.30  
1.29  
0.91  
0.89  
0.88

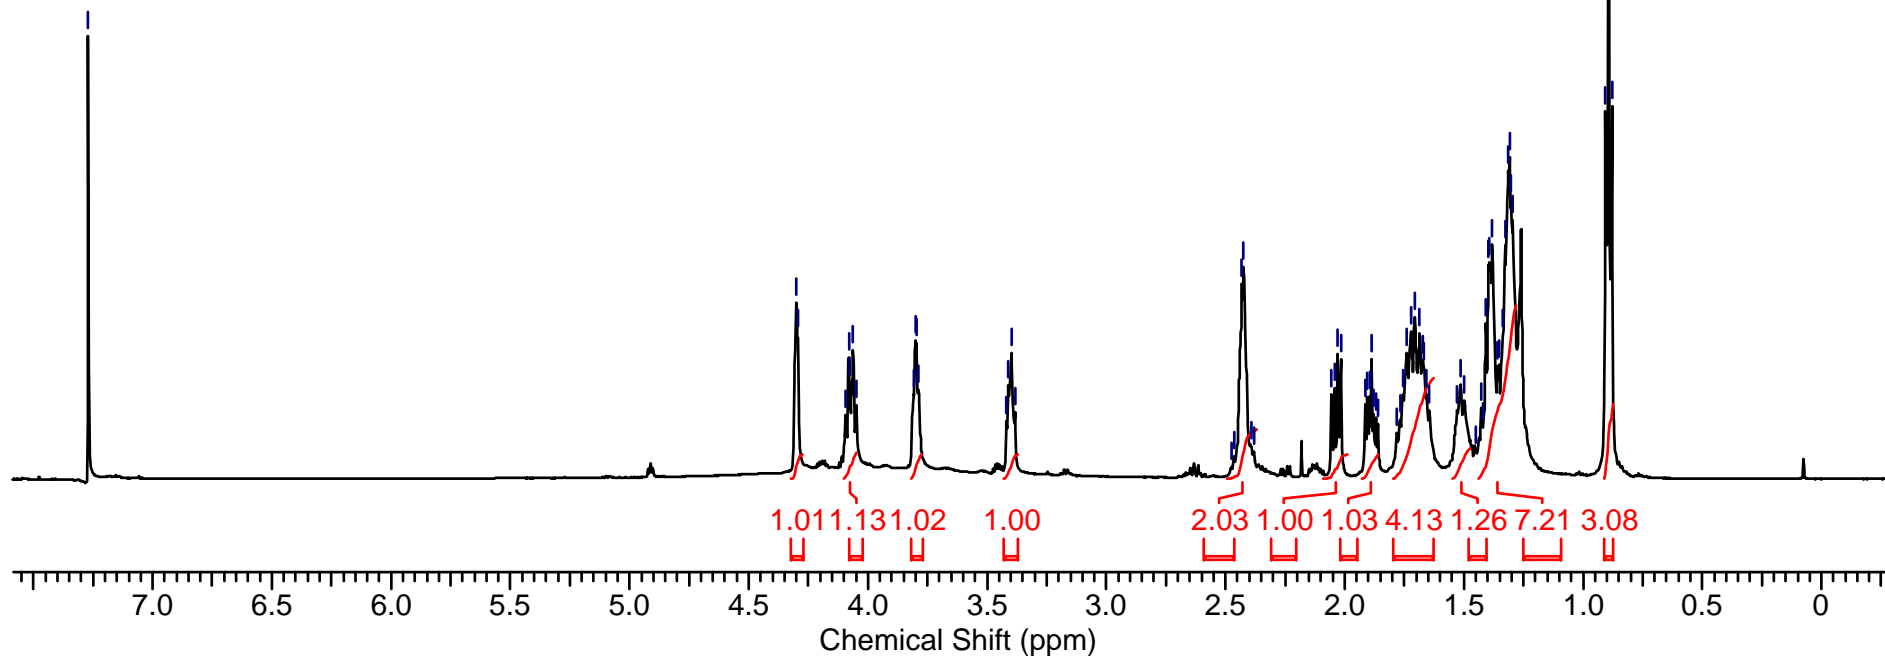

# $^{13}\text{C}$ NMR (125MHz, $\text{CDCl}_3$ ) of the compound (+)-Petromyroxol 1:

Tue3av500#015.003.001.1r.esp

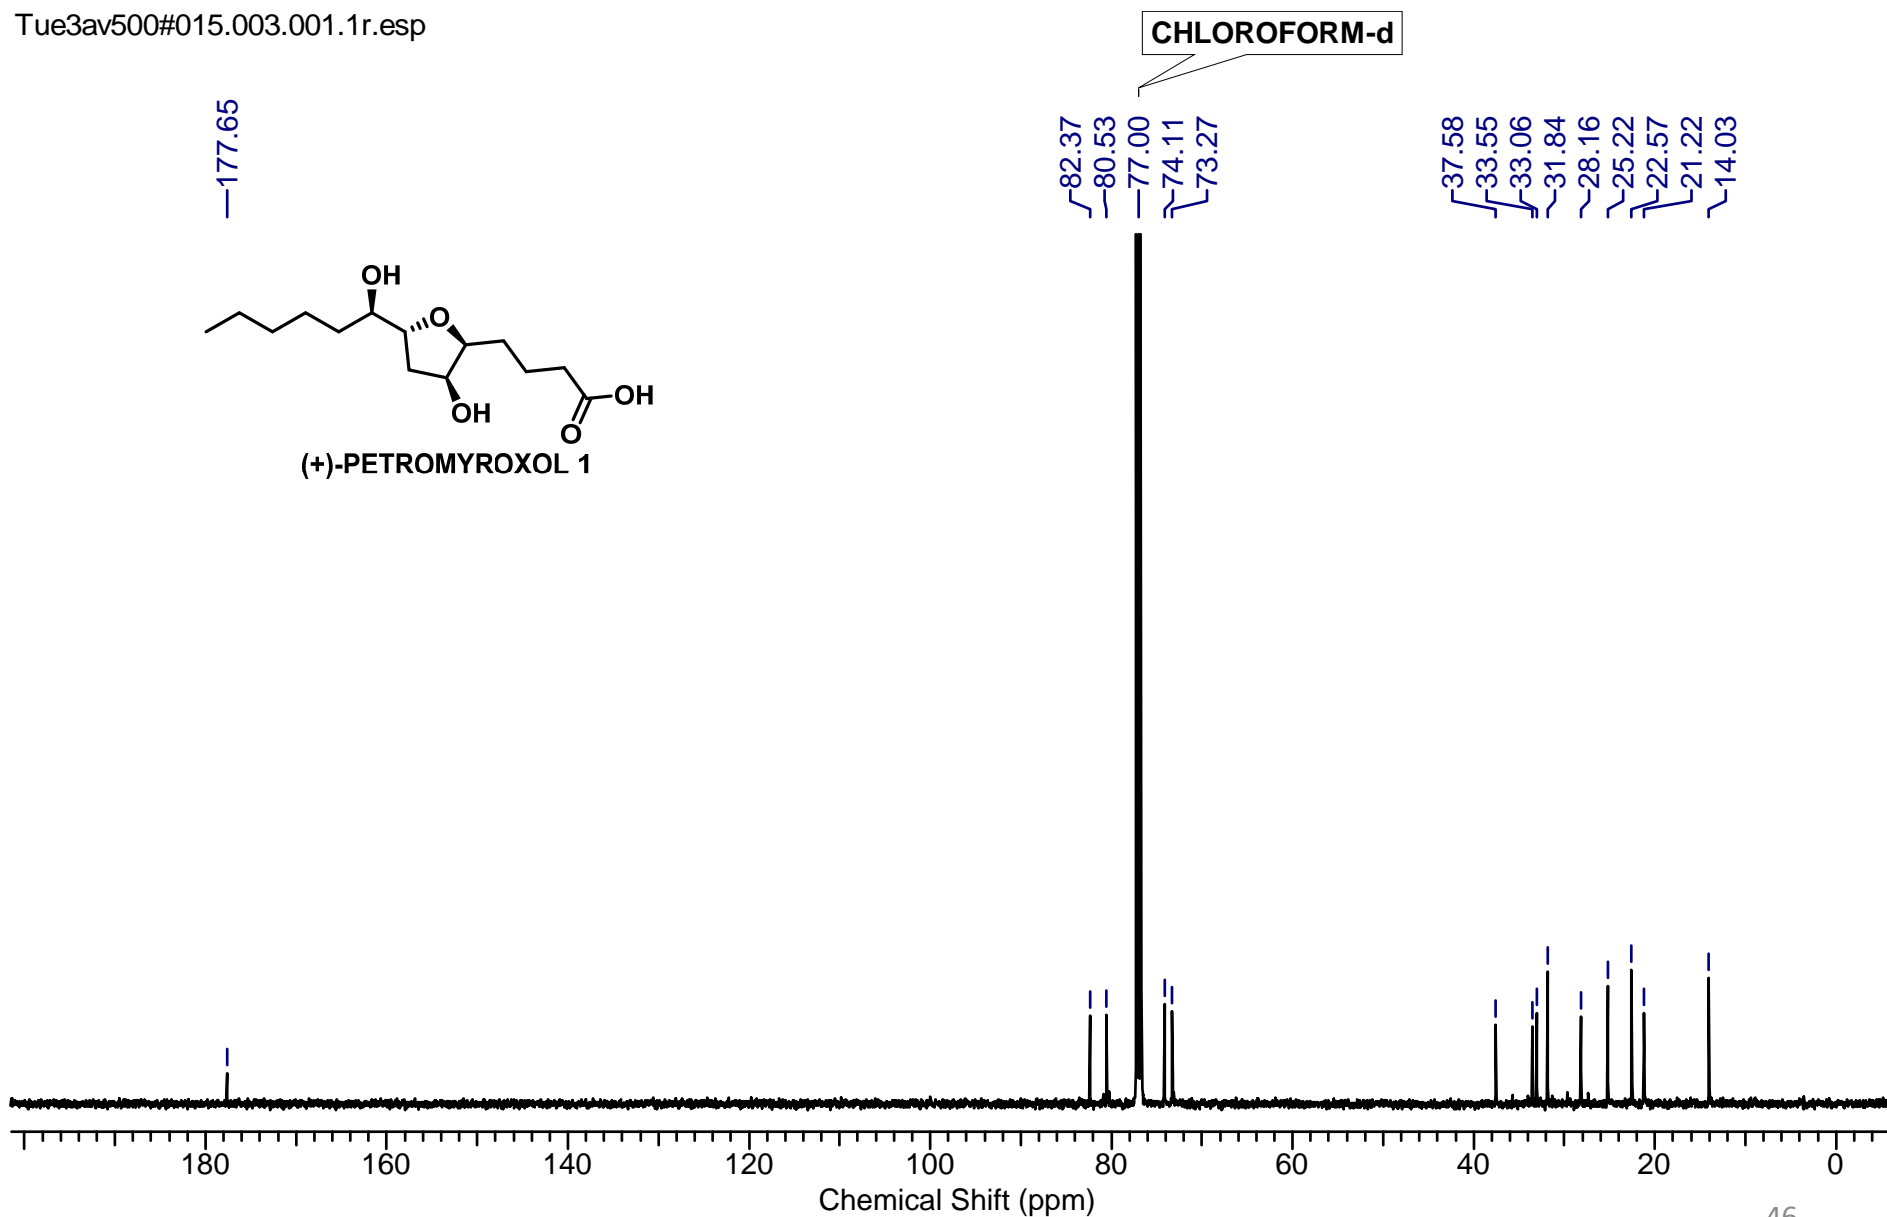

UNR-A-10 #104 RT: 0.46 AV: 1 NL: 1.74E8  
T: FTMS + p ESI Full ms [86.00-1290.00]

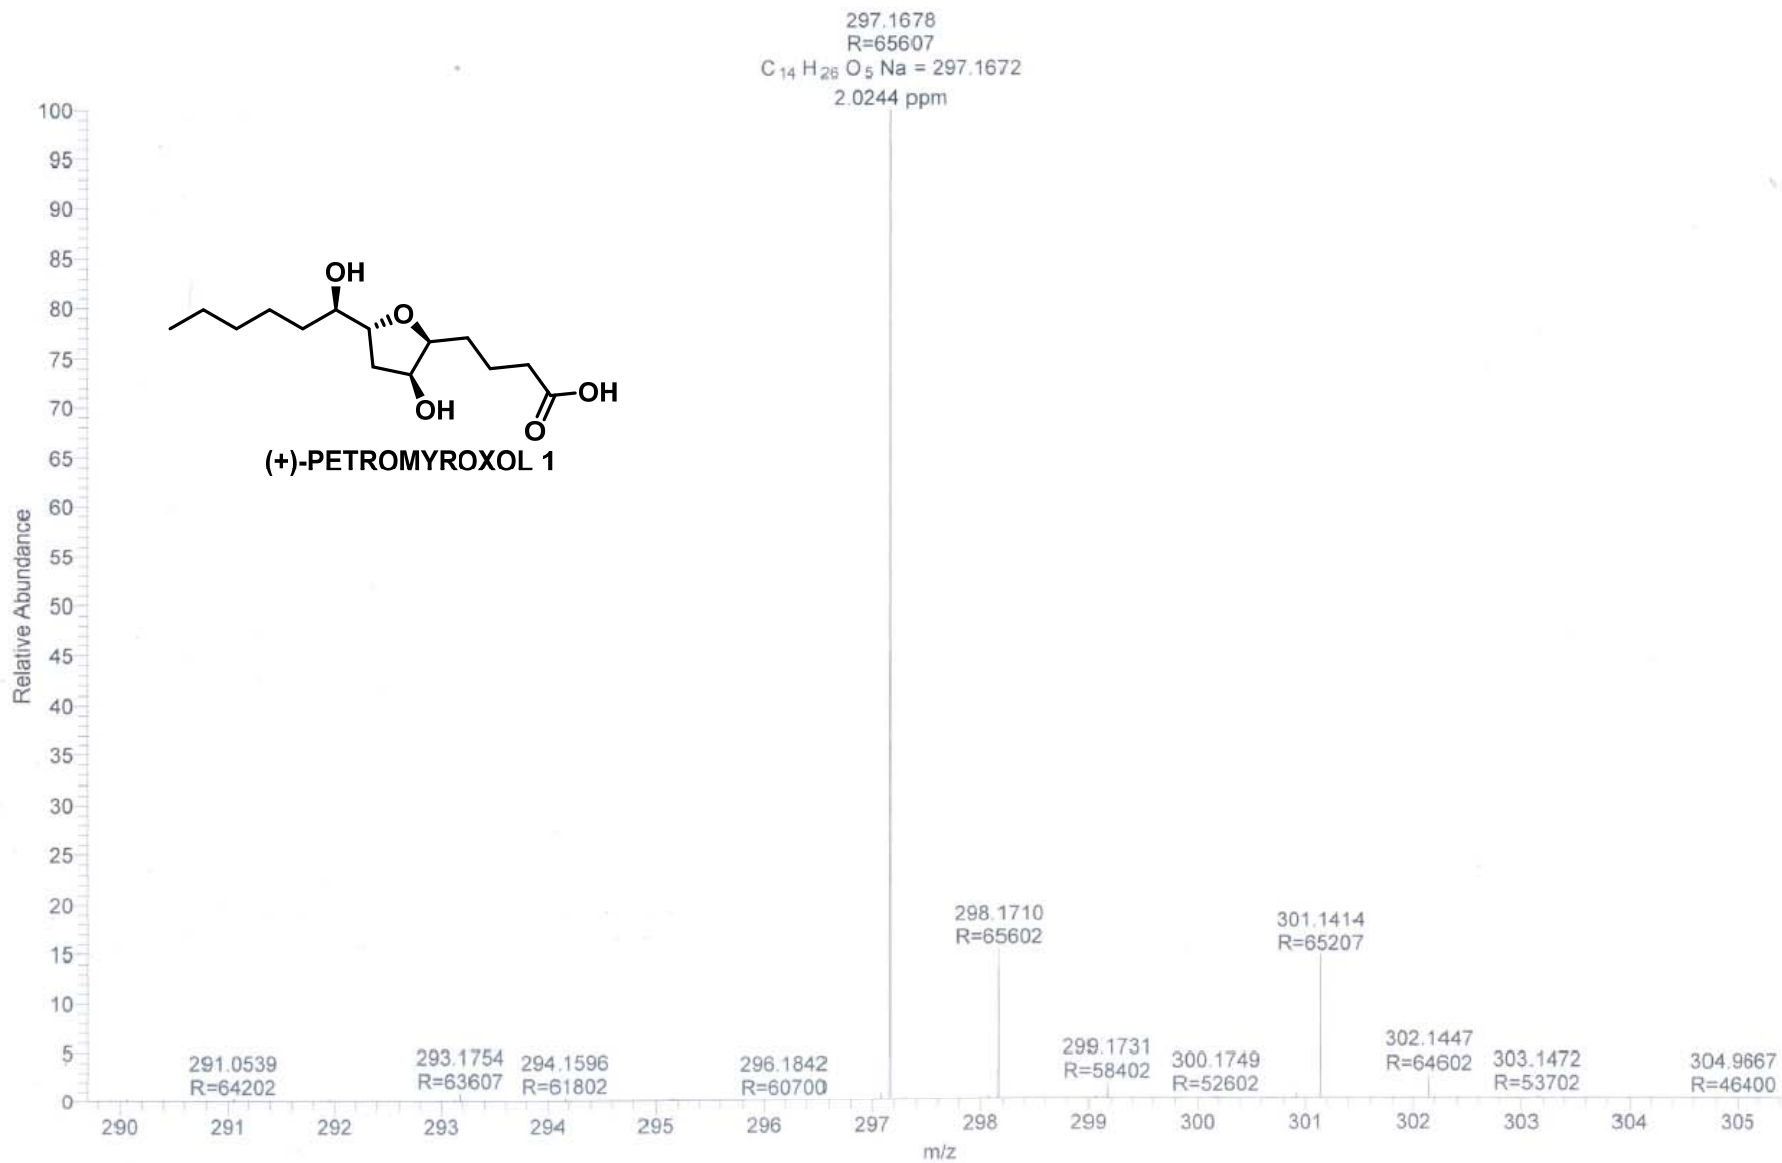

# Comparison of <sup>1</sup>H NMR

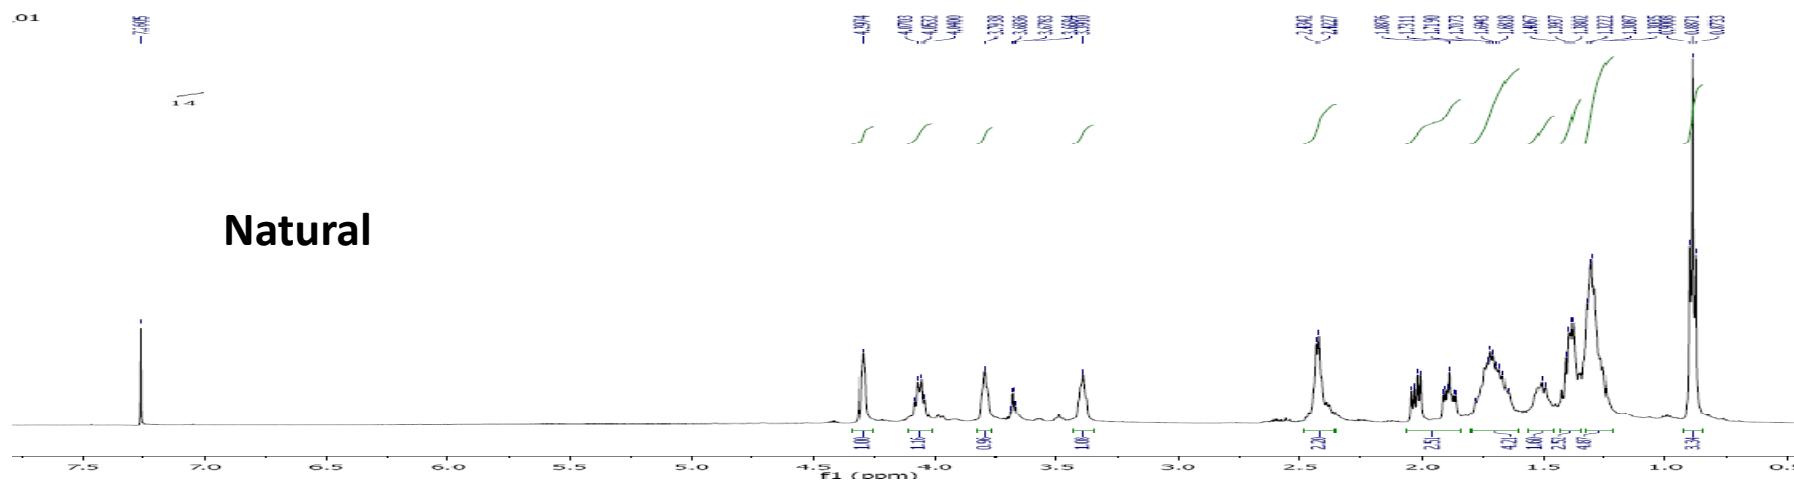

Tue34 CHLOROFORM-d Ir.esp

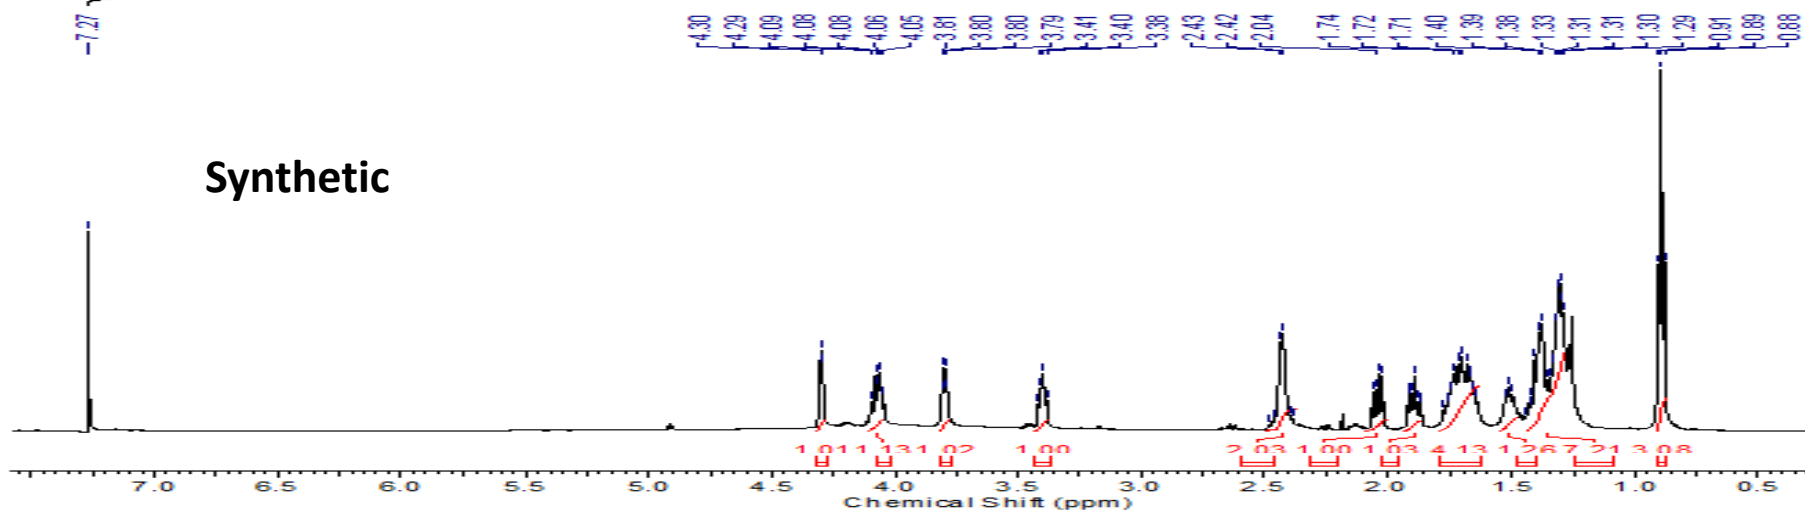



# Comparison of $^{13}\text{C}$ NMR

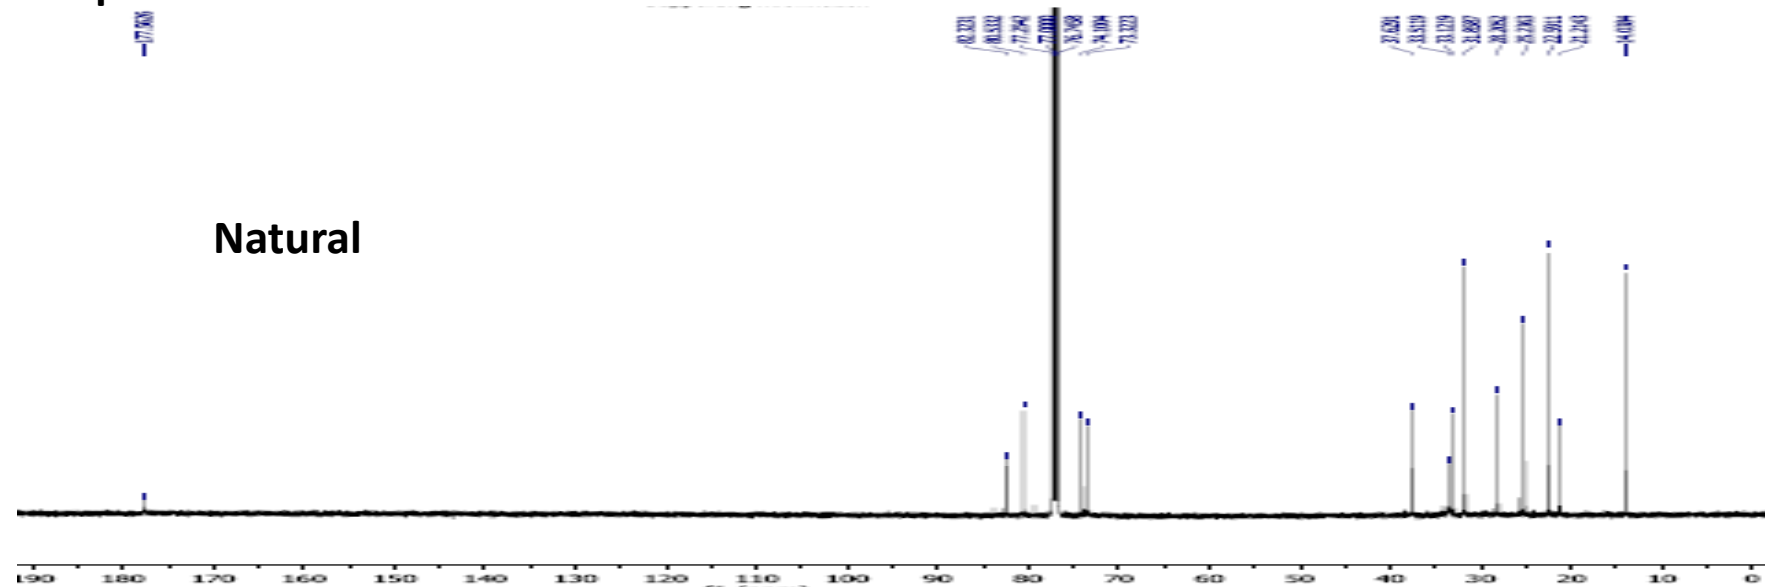

Tue3av500#015.003.001.1r.esp

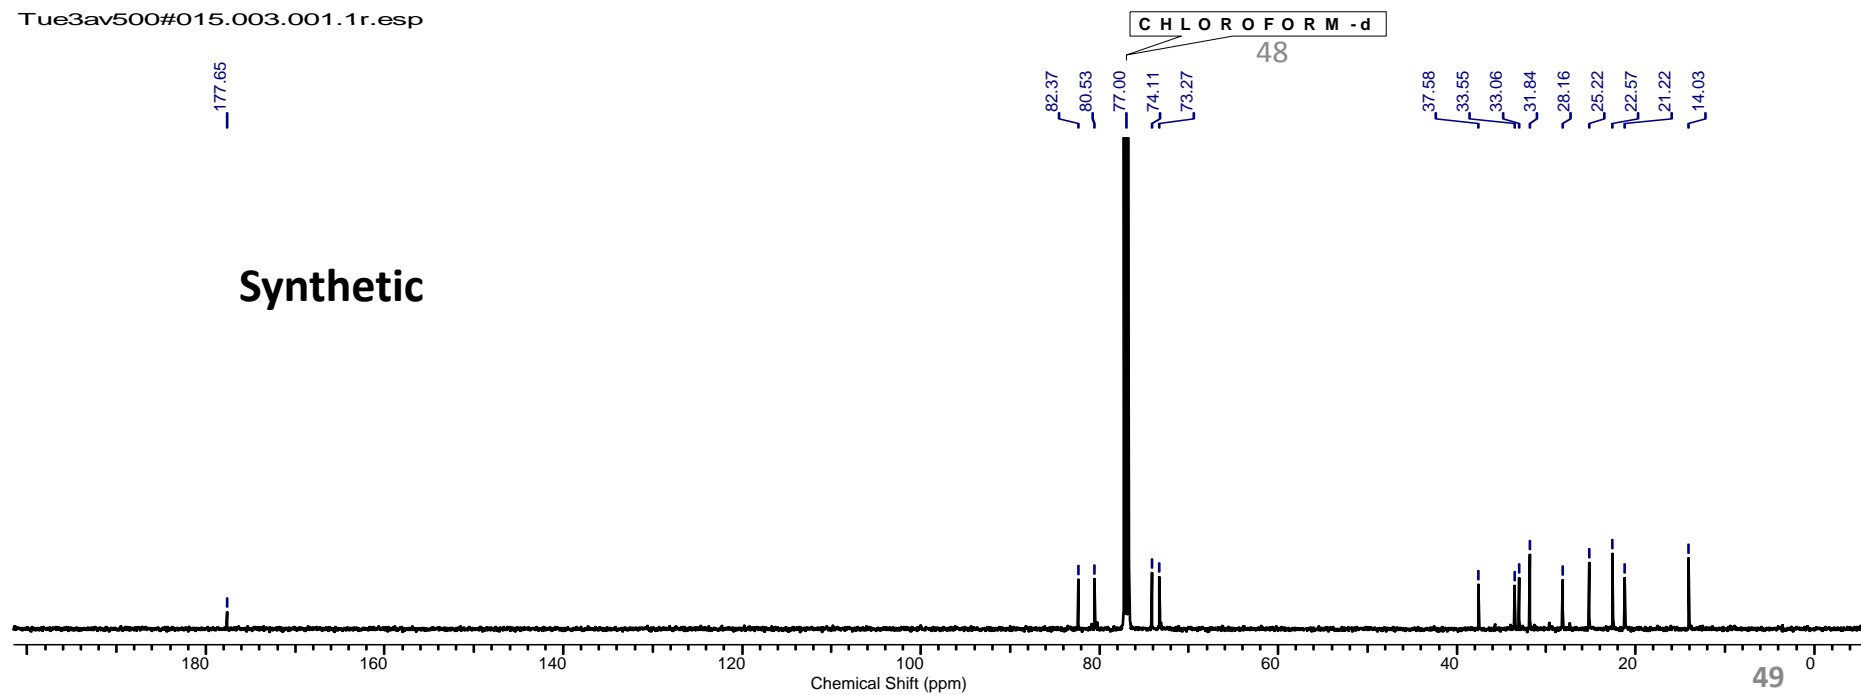

**Comparison of  $^1\text{H}$  and  $^{13}\text{C}$  NMR data of both natural and synthetic (+)-Petromyroxol**

| Synthetic (+)-Petromyroxol spectroscopic data<br>(500MHz, $\text{CDCl}_3$ ) |                                         |                     | Natural (+)-Petromyroxol spectroscopic data<br>(500MHz, $\text{CDCl}_3$ ) |                     |
|-----------------------------------------------------------------------------|-----------------------------------------|---------------------|---------------------------------------------------------------------------|---------------------|
| S.No.                                                                       | $(\delta_{\text{H}}, J \text{ in Hz})$  | $\delta_{\text{C}}$ | $(\delta_{\text{H}}, J \text{ in Hz})$                                    | $\delta_{\text{C}}$ |
| 1.                                                                          |                                         | 177.7               |                                                                           | 177.6, C            |
| 2.                                                                          | 2.49 - 2.37 m                           | 33.5                | 2.43, m                                                                   | 33.7, $\text{CH}_2$ |
| 3.                                                                          | 1.80 - 1.63 m                           | 21.2                | 1.77 m, 1.70 m                                                            | 21.4, $\text{CH}_2$ |
| 4.                                                                          |                                         | 28.2                | 1.72 m, 1.67 m                                                            | 28.4, $\text{CH}_2$ |
| 5.                                                                          | 3.82 - 3.77 ddd ( $J = 2.4, 6.5, 6.5$ ) | 82.4                | 3.79 ddd ( $J = 2.5, 6.5, 6.5$ )                                          | 82.5, CH            |
| 6.                                                                          | 4.32 - 4.27 dd ( $J = 3.5, 3.5$ )       | 73.3                | 4.30 dd ( $J = 3.5, 3.5$ )                                                | 73.5, CH            |
| 7.                                                                          | 1.89 ddd ( $J = 4.6, 9.1, 13.5$ )       | 37.6                | 1.89 ddd ( $J = 4.6, 9.2, 13.7$ )                                         | 37.8, $\text{CH}_2$ |
|                                                                             | 2.04 dd ( $J = 6.6, 13.3$ )             |                     | 2.02 dd ( $J = 6.6, 13.4$ )                                               |                     |
| 8.                                                                          | 4.10 - 4.04 ddd ( $J = 6.4, 6.7, 8.9$ ) | 80.5                | 4.06 ddd ( $J = 6.5, 6.5, 8.9$ )                                          | 80.7, CH            |
| 9.                                                                          | 3.43 - 3.37 ddd ( $J = 4.0, 6.4, 7.3$ ) | 74.1                | 3.39 m                                                                    | 74.3, CH            |
| 10.                                                                         | 1.55 - 1.47 m                           | 33.1                | 1.40 m                                                                    | 33.3, $\text{CH}_2$ |
| 11.                                                                         |                                         | 25.2                | 1.51 m, 1.38 m                                                            | 25.4, $\text{CH}_2$ |
| 12.                                                                         | 1.44 - 1.28 m                           | 31.8                | 1.29 m                                                                    | 32.0, $\text{CH}_2$ |
| 13.                                                                         |                                         | 22.6                | 1.31 m                                                                    | 22.8, $\text{CH}_2$ |
| 14.                                                                         | 0.89 t ( $J = 6.9$ )                    | 14.0                | 0.89 t ( $J = 6.9$ )                                                      | 14.2, $\text{CH}_2$ |
